# Supplementary material for: Salivary proteomics of healthy dogs: An in depth catalog
Source: PLoS One. 2018 Jan 12;13(1):e0191307. doi: 10.1371/journal.pone.0191307 (PMC5766244; doi:10.1371/journal.pone.0191307)
Supplement: S3 Appendix — (XLSX) [file pone.0191307.s003.xlsx]

## Sheet: Protein_list_GI_numbers.txt
Identified Proteins	Gene Symbol	Accession Number	Additional gi info	Molecular Weight	Protein Grouping Ambiguity	Protein Spectral Counts
						Ancient	Herding-Sighthound	Miscellaneous-1	Miscellaneous-2	Sum
PREDICTED: LOW QUALITY PROTEIN: IgGFc-binding protein [Canis lupus familiaris]	FCGBP	gi|545488517		316 kDa	TRUE	4	234	234	325	797
polymeric immunoglobulin receptor precursor [Canis lupus familiaris]	PIGR	gi|560891934		83 kDa		2	164	204	201	571
PREDICTED: BPI fold-containing family A member 2 isoform 1 [Canis lupus familiaris]	BPIFA2	gi|73991578		27 kDa	TRUE	41	136	103	186	466
PREDICTED: BPI fold-containing family B member 1 isoform X2 [Canis lupus familiaris]	BPIFB1	gi|545540364		54 kDa		42	96	67	147	352
Cluster of serum albumin precursor [Canis lupus familiaris] (gi|55742764)	ALB	gi|55742764	[3]	69 kDa	TRUE	59	64	100	73	296
PREDICTED: ovostatin homolog 2-like isoform X1 [Canis lupus familiaris]	LOC611455	gi|545546408		164 kDa	TRUE	12	85	81	92	270
PREDICTED: mucin-19-like [Canis lupus familiaris]	MUC19	gi|545547107		86 kDa	TRUE	0	65	93	106	264
PREDICTED: angiopoietin-related protein 5-like [Canis lupus familiaris]	LOC607055	gi|545514351		22 kDa	TRUE	10	70	92	89	261
Cluster of PREDICTED: actin, cytoplasmic 2 [Canis lupus familiaris] (gi|545509102)	ACTG1	gi|545509102	[9]	37 kDa	TRUE	29	59	83	73	244
Cluster of PREDICTED: immunoglobulin lambda-like polypeptide 5-like isoform X2 [Canis lupus familiaris] (gi|545544683)	LOC607368	gi|545544683	[6]	25 kDa	TRUE	49	38	58	74	219
PREDICTED: mucin-5B [Canis lupus familiaris]	MUC5B	gi|545530344		539 kDa	TRUE	14	46	69	72	201
PREDICTED: lysozyme C, milk isozyme-like [Canis lupus familiaris]	LYZF2	gi|73996855		17 kDa		3	55	72	63	193
PREDICTED: double-headed protease inhibitor, submandibular gland-like [Canis lupus familiaris]	LOC478056	gi|545490619		16 kDa		8	49	69	61	187
major allergen Can f 1 precursor [Canis lupus familiaris]	O18873	gi|50978938		19 kDa		6	57	62	60	185
lactotransferrin precursor [Canis lupus familiaris]	LTF	gi|559767226		77 kDa	TRUE	8	43	52	80	183
PREDICTED: carbonic anhydrase 6 isoform X1 [Canis lupus familiaris]	CA6	gi|545499121		37 kDa	TRUE	16	42	50	69	177
Cluster of PREDICTED: heat shock-related 70 kDa protein 2 isoform 1 [Canis lupus familiaris] (gi|57090217)	HSPA2	gi|57090217	[8]	70 kDa	TRUE	14	45	53	48	160
Cluster of PREDICTED: leukocyte elastase inhibitor [Canis lupus familiaris] (gi|545554777)	SERPINB1	gi|545554777	[5]	50 kDa	TRUE	12	39	44	54	149
Cluster of PREDICTED: alpha-actinin-4 isoformX2 [Canis lupus familiaris] (gi|73947718)	ACTN4	gi|73947718	[10]	105 kDa	TRUE	12	37	46	52	147
PREDICTED: lactoperoxidase isoform 2 [Canis lupus familiaris]	LPO	gi|345805633		80 kDa	TRUE	3	41	37	63	144
Cluster of PREDICTED: glucose-6-phosphate isomerase isoform X2 [Canis lupus familiaris] (gi|545489007)	GPI	gi|545489007	[3]	60 kDa	TRUE	10	35	40	49	134
PREDICTED: alpha-2-macroglobulin-like 1 [Canis lupus familiaris]	A2ML1	gi|345791586		160 kDa	TRUE	18	24	24	45	111
PREDICTED: complement C3 [Canis lupus familiaris]	C3	gi|545535669		180 kDa	TRUE	2	26	40	43	111
PREDICTED: LOW QUALITY PROTEIN: serotransferrin isoform 1 [Canis lupus familiaris]	TF	gi|545539001		85 kDa	TRUE	10	20	35	44	109
Cluster of PREDICTED: 14-3-3 protein zeta/delta isoform X3 [Canis lupus familiaris] (gi|545520485)	FAS	gi|545520485	[2]	28 kDa	TRUE	57	14	18	19	108
PREDICTED: protein-glutamine gamma-glutamyltransferase E [Canis lupus familiaris]	TGM3	gi|545540174		78 kDa	TRUE	2	22	30	51	105
PREDICTED: deleted in malignant brain tumors 1 protein isoform X1 [Canis lupus familiaris]	DMBT1	gi|545548194	(+1)	233 kDa		7	27	27	44	105
Cluster of PREDICTED: fructose-bisphosphate aldolase A isoform X3 [Canis lupus familiaris] (gi|545501672)	ALDOA	gi|545501672	[2]	45 kDa	TRUE	41	19	18	23	101
Cluster of hemoglobin subunit beta-like [Canis lupus familiaris] (gi|399567834)	HBB	gi|399567834	[4]	16 kDa	TRUE	28	10	37	25	100
Cluster of lysozyme precursor [Canis lupus familiaris] (gi|665505916)	LYZ	gi|665505916	[2]	17 kDa	TRUE	28	24	19	28	99
PREDICTED: prolactin-inducible protein homolog [Canis lupus familiaris]	PIP	gi|73978762		17 kDa		13	17	30	38	98
Cluster of PREDICTED: glyceraldehyde-3-phosphate dehydrogenase-like [Canis lupus familiaris] (gi|345807932)	LOC100688969	gi|345807932	[6]	36 kDa	TRUE	27	18	28	18	91
Cluster of PREDICTED: transketolase isoform X2 [Canis lupus familiaris] (gi|545533391)	TKT	gi|545533391	[3]	65 kDa	TRUE	4	29	26	32	91
Cluster of myosin-9 [Canis lupus familiaris] (gi|160425231)	MYH9	gi|160425231	[6]	226 kDa	TRUE	17	19	26	22	84
PREDICTED: BPI fold-containing family B member 2 [Canis lupus familiaris]	BPIFB2	gi|345789608		50 kDa		2	30	21	31	84
Cluster of desmoglein-1 precursor [Canis lupus familiaris] (gi|50950135)	DSG1	gi|50950135	[2]	114 kDa	TRUE	20	13	20	31	84
PREDICTED: prostaglandin reductase 1 isoform X2 [Canis lupus familiaris]	PTGR1	gi|545517915		36 kDa		2	21	23	38	84
Cluster of PREDICTED: fatty acid-binding protein, epidermal [Canis lupus familiaris] (gi|545548960)	FABP5	gi|545548960	[2]	17 kDa	TRUE	3	27	21	29	80
Cluster of PREDICTED: gelsolin [Canis lupus familiaris] (gi|545518174)	GSN	gi|545518174	[2]	94 kDa	TRUE	30	12	19	18	79
Cluster of PREDICTED: histone H2B type 1-J-like [Canis lupus familiaris] (gi|545554810)	LOC488279	gi|545554810	[7]	24 kDa	TRUE	3	25	23	27	78
Cluster of PREDICTED: cysteine-rich secretory protein 2 isoform X2 [Canis lupus familiaris] (gi|545519430)	LOC481834	gi|545519430	[2]	29 kDa	TRUE	6	20	28	22	76
PREDICTED: mucin-4 isoform X1 [Canis lupus familiaris]	MUC4	gi|545553149	(+1)	126 kDa	TRUE	3	19	23	30	75
PREDICTED: submaxillary mucin-like protein-like [Canis lupus familiaris]	LOC102156279	gi|545547103		44 kDa	TRUE	0	19	33	22	74
Cluster of PREDICTED: NAD(P)H dehydrogenase [quinone] 1 [Canis lupus familiaris] (gi|545500084)	NQO1	gi|545500084		31 kDa	TRUE	5	12	29	26	72
Cluster of PREDICTED: allergen Fel d 4 isoform X1 [Canis lupus familiaris] (gi|545517938)	LOC481674	gi|545517938	[2]	24 kDa	TRUE	8	16	21	27	72
PREDICTED: 14-3-3 protein sigma [Canis lupus familiaris]	SFN	gi|545491676		28 kDa	TRUE	9	15	23	24	71
Cluster of PREDICTED: LOW QUALITY PROTEIN: alpha-enolase isoform 1 [Canis lupus familiaris] (gi|345800677)	ENO1	gi|345800677	[4]	49 kDa	TRUE	2	19	23	26	70
clusterin precursor [Canis lupus familiaris]	CLU	gi|50979240		52 kDa		4	21	19	24	68
PREDICTED: fatty acid synthase [Canis lupus familiaris]	FASN	gi|545509598		269 kDa	TRUE	0	19	22	27	68
Cluster of PREDICTED: myosin-14 isoform 1 [Canis lupus familiaris] (gi|359318588)	MYH14	gi|359318588	[2]	232 kDa	TRUE	4	12	24	25	65
triosephosphate isomerase [Canis lupus familiaris]	TPI1	gi|308082020		27 kDa		2	14	22	26	64
PREDICTED: IQ motif containing GTPase activating protein 1 [Canis lupus familiaris]	IQGAP1	gi|73951551		189 kDa	TRUE	7	16	19	22	64
PREDICTED: L-amino-acid oxidase-like [Canis lupus familiaris]	LOC482436	gi|545524998		59 kDa		8	16	22	16	62
Cluster of PREDICTED: pyruvate kinase PKM isoform X4 [Canis lupus familiaris] (gi|545550327)	PKM	gi|545550327	[4]	62 kDa	TRUE	10	18	17	17	62
serine protease inhibitor Kazal-type 5 precursor [Canis lupus familiaris]	spink5	gi|70794744		121 kDa		2	18	22	20	62
PREDICTED: xanthine dehydrogenase/oxidase isoform X2 [Canis lupus familiaris]	XDH	gi|545527502		147 kDa	TRUE	2	13	22	24	61
kallikrein-1 precursor [Canis lupus familiaris]	Q29474	gi|55741639		29 kDa	TRUE	8	11	20	22	61
Cluster of PREDICTED: guanine deaminase isoform X2 [Canis lupus familiaris] (gi|345785211)	GDA	gi|345785211	[2]	51 kDa	TRUE	6	15	14	25	60
Cluster of PREDICTED: UPF0762 protein C6orf58 isoformX1 [Canis lupus familiaris] (gi|73945892)	C1H6orf58	gi|73945892	[2]	35 kDa	TRUE	3	22	13	22	60
Cluster of PREDICTED: tubulin beta-6 chain isoform 3 [Canis lupus familiaris] (gi|345803407)	TUBB6	gi|345803407	[10]	50 kDa	TRUE	9	14	15	21	59
Cluster of PREDICTED: tubulin alpha-1C chain [Canis lupus familiaris] (gi|359323129)	TUBA1C	gi|359323129	[10]	50 kDa	TRUE	15	11	18	15	59
PREDICTED: leukotriene A-4 hydrolase [Canis lupus familiaris]	LTA4H	gi|345781076		69 kDa	TRUE	4	20	17	17	58
PREDICTED: involucrin isoform X1 [Canis lupus familiaris]	IVL	gi|545528998		33 kDa		5	9	27	16	57
Cluster of PREDICTED: proactivator polypeptide isoformX6 [Canis lupus familiaris] (gi|73952852)	PSAP	gi|73952852	[3]	58 kDa	TRUE	14	12	12	17	55
Cluster of PREDICTED: glutathione S-transferase Mu 1 isoform 1 [Canis lupus familiaris] (gi|73959317)	GSTM4	gi|73959317	[2]	26 kDa	TRUE	2	7	12	34	55
PREDICTED: 78 kDa glucose-regulated protein isoform 5 [Canis lupus familiaris]	HSPA5	gi|345806081		72 kDa	TRUE	0	14	17	23	54
Cluster of PREDICTED: NADP-dependent malic enzyme [Canis lupus familiaris] (gi|545519773)	ME1	gi|545519773	[2]	61 kDa	TRUE	11	10	13	19	53
PREDICTED: isocitrate dehydrogenase [NADP] cytoplasmic isoform 1 [Canis lupus familiaris]	IDH1	gi|74005287		47 kDa	TRUE	2	15	16	20	53
PREDICTED: apolipoprotein A-I [Canis lupus familiaris]	APOA1	gi|73955106		30 kDa	TRUE	2	16	17	17	52
Cluster of PREDICTED: clathrin heavy chain 1 isoformX1 [Canis lupus familiaris] (gi|73966629)	CLTC	gi|73966629	[3]	192 kDa	TRUE	10	10	15	16	51
Cluster of PREDICTED: phosphoglycerate kinase 1 isoform 2 [Canis lupus familiaris] (gi|74007807)	PGK1	gi|74007807	[2]	44 kDa	TRUE	3	17	14	17	51
Cluster of PREDICTED: plastin-3 isoform X4 [Canis lupus familiaris] (gi|545559088)	PLS3	gi|545559088	[2]	71 kDa	TRUE	9	9	17	15	50
Cluster of PREDICTED: malate dehydrogenase, mitochondrial-like [Canis lupus familiaris] (gi|545537962)	LOC102152275	gi|545537962	[2]	44 kDa	TRUE	6	8	18	17	49
zinc-alpha-2-glycoprotein precursor [Canis lupus familiaris]	AZGP1	gi|560879429		36 kDa		3	18	12	16	49
Cluster of PREDICTED: 14-3-3 protein theta isoform 1 [Canis lupus familiaris] (gi|57098115)	YWHAQ	gi|57098115	[2]	28 kDa	TRUE	1	10	16	21	48
PREDICTED: vinculin [Canis lupus familiaris]	VCL	gi|345798988		127 kDa		7	8	12	20	47
Cluster of PREDICTED: histone H2A type 2-C-like [Canis lupus familiaris] (gi|359321687)	HIST2H2AC	gi|359321687	[10]	14 kDa	TRUE	2	10	21	14	47
PREDICTED: dihydropyrimidine dehydrogenase [NADP(+)] [Canis lupus familiaris]	DPYD	gi|545503113		109 kDa		5	9	15	18	47
PREDICTED: talin-1 isoform X2 [Canis lupus familiaris]	TLN1	gi|545517526		271 kDa	TRUE	12	14	14	7	47
WD repeat domain 1 [Canis lupus familiaris]	WDR1	gi|195546936		66 kDa		2	16	15	13	46
PREDICTED: epithelial chloride channel protein-like [Canis lupus familiaris]	LOC479964	gi|545503796		100 kDa	TRUE	1	13	13	19	46
PREDICTED: fibronectin, partial [Canis lupus familiaris]	FN1	gi|545556445		268 kDa		6	12	20	8	46
PREDICTED: complement C4-A [Canis lupus familiaris]	C4A	gi|545520262		193 kDa	TRUE	7	10	14	14	45
PREDICTED: plastin-2 isoform X2 [Canis lupus familiaris]	LCP1	gi|545537421		70 kDa	TRUE	9	11	18	7	45
Cluster of trefoil factor 3 precursor [Canis lupus familiaris] (gi|50950221)	TFF3	gi|50950221	[2]	9 kDa	TRUE	5	7	15	17	44
PREDICTED: ceruloplasmin-like [Canis lupus familiaris]	LOC611632	gi|345788999		119 kDa	TRUE	4	12	15	12	43
Cluster of PREDICTED: antithrombin-III isoform 1 [Canis lupus familiaris] (gi|359320010)	SERPINC1	gi|359320010	[2]	52 kDa	TRUE	9	11	9	14	43
Cluster of cathepsin D precursor [Canis lupus familiaris] (gi|71043798)	CTSD	gi|71043798	[2]	44 kDa	TRUE	16	5	10	12	43
Cluster of PREDICTED: heat shock protein HSP 90-beta isoformX1 [Canis lupus familiaris] (gi|359320981)	HSP90AB1	gi|359320981	[2]	83 kDa	TRUE	10	9	10	13	42
PREDICTED: 6-phosphogluconate dehydrogenase, decarboxylating isoform 1 [Canis lupus familiaris]	PGD	gi|73950940		53 kDa		6	12	16	8	42
Cluster of PREDICTED: 14-3-3 protein epsilon isoformX2 [Canis lupus familiaris] (gi|73967156)	YWHAE	gi|73967156	[2]	29 kDa	TRUE	0	11	13	18	42
PREDICTED: rho GDP-dissociation inhibitor 1 isoform 2 [Canis lupus familiaris]	ARHGDIA	gi|73964747		23 kDa	TRUE	2	10	15	14	41
Cluster of PREDICTED: ribosyldihydronicotinamide dehydrogenase [quinone] isoform 2 [Canis lupus familiaris] (gi|74003808)	NQO2	gi|74003808	[2]	26 kDa	TRUE	18	6	6	11	41
desmoglein-3 precursor [Canis lupus familiaris]	DSG3	gi|50950209		108 kDa	TRUE	3	12	12	13	40
PREDICTED: puromycin-sensitive aminopeptidase [Canis lupus familiaris]	NPEPPS	gi|545511022		97 kDa	TRUE	7	5	16	12	40
PREDICTED: macrophage-capping protein isoform X2 [Canis lupus familiaris]	CAPG	gi|545528000		39 kDa		5	8	12	15	40
Cluster of PREDICTED: cofilin-1 isoform X2 [Canis lupus familiaris] (gi|545530743)	CFL1	gi|545530743	[5]	20 kDa	TRUE	6	8	15	11	40
PREDICTED: LOW QUALITY PROTEIN: ubiquitin-like modifier activating enzyme 1 [Canis lupus familiaris]	UBA1	gi|545557926		120 kDa		3	11	13	13	40
PREDICTED: elongation factor 2 [Canis lupus familiaris]	EEF2	gi|359322142		95 kDa	TRUE	0	9	11	19	39
rab GDP dissociation inhibitor beta [Canis lupus familiaris]	GDI2	gi|50978926		50 kDa	TRUE	3	6	16	14	39
Cluster of PREDICTED: desmocollin-2 isoformX3 [Canis lupus familiaris] (gi|73961312)	DSC2	gi|73961312	[2]	101 kDa	TRUE	4	4	15	16	39
PREDICTED: transitional endoplasmic reticulum ATPase isoform 3 [Canis lupus familiaris]	VCP	gi|73971210		89 kDa		6	9	9	15	39
PREDICTED: protein disulfide-isomerase A3 [Canis lupus familiaris]	PDIA3	gi|345794865		57 kDa	TRUE	3	6	12	17	38
PREDICTED: protein disulfide-isomerase A4 isoform 3 [Canis lupus familiaris]	PDIA4	gi|359321459		72 kDa	TRUE	6	13	7	12	38
Cluster of PREDICTED: hyaluronidase-1 isoform X1 [Canis lupus familiaris] (gi|545533635)	HYAL1	gi|545533635	[2]	51 kDa	TRUE	1	11	9	17	38
PREDICTED: profilin-1 [Canis lupus familiaris]	PFN1	gi|545497795		19 kDa		0	8	16	13	37
PREDICTED: glycogen phosphorylase, liver form isoform 2 [Canis lupus familiaris]	PYGL	gi|359320055		93 kDa	TRUE	3	7	14	12	36
Cluster of rab GDP dissociation inhibitor alpha [Canis lupus familiaris] (gi|50978936)	GDI1	gi|50978936	[2]	51 kDa	TRUE	3	11	9	13	36
Cluster of PREDICTED: actin-related protein 2 isoform 2 [Canis lupus familiaris] (gi|73969818)	ACTR2	gi|73969818	[2]	45 kDa	TRUE	5	8	10	13	36
endoplasmin precursor [Canis lupus familiaris]	HSP90B1	gi|50979166		93 kDa	TRUE	4	11	8	12	35
Cluster of PREDICTED: transmembrane protease serine 9 [Canis lupus familiaris] (gi|545508770)	LOC490629	gi|545508770		58 kDa	TRUE	7	6	13	9	35
liver carboxylesterase 1 precursor [Canis lupus familiaris]	CESdD1	gi|50978766		62 kDa		1	7	12	14	34
minor allergen Can f 2 precursor [Canis lupus familiaris]	O18874	gi|50978944		20 kDa		6	7	15	6	34
PREDICTED: vitamin D-binding protein isoform X3 [Canis lupus familiaris]	GC	gi|545521763		53 kDa		2	9	12	11	34
PREDICTED: adenylyl cyclase-associated protein 1 isoform X3 [Canis lupus familiaris]	CAP1	gi|545523470		52 kDa	TRUE	5	9	10	10	34
PREDICTED: uridine phosphorylase 1 [Canis lupus familiaris]	LOC100856638	gi|545529166		38 kDa		0	10	12	12	34
PREDICTED: serpin B10 [Canis lupus familiaris]	SERPINB10	gi|73945839		45 kDa	TRUE	3	8	9	14	34
Cluster of PREDICTED: fructose-1,6-bisphosphatase 1 isoformX3 [Canis lupus familiaris] (gi|73946392)	FBP1	gi|73946392	[2]	37 kDa	TRUE	3	5	10	16	34
Cluster of PREDICTED: family with sequence similarity 129, member B isoform X2 [Canis lupus familiaris] (gi|73968197)	FAM129B	gi|73968197	[2]	84 kDa	TRUE	3	10	8	13	34
PREDICTED: protein S100-A2 isoform X1 [Canis lupus familiaris]	S100A2	gi|545505706		11 kDa	TRUE	5	11	5	12	33
PREDICTED: inhibitor of carbonic anhydrase-like [Canis lupus familiaris]	TF	gi|545538999		77 kDa	TRUE	5	5	12	11	33
Cluster of PREDICTED: glucose-6-phosphate 1-dehydrogenase isoform X1 [Canis lupus familiaris] (gi|545559938)	G6PD	gi|545559938	[2]	64 kDa	TRUE	5	4	13	11	33
Cluster of 15-hydroxyprostaglandin dehydrogenase [Canis lupus familiaris] (gi|548923825)	HPGD	gi|548923825	[2]	29 kDa	TRUE	6	7	9	11	33
annexin A1 [Canis lupus familiaris]	ANXA1	gi|558695394		39 kDa		3	5	10	15	33
PREDICTED: carboxypeptidase D isoform 2 [Canis lupus familiaris]	CPD	gi|73967304		153 kDa		3	9	9	12	33
Cluster of heat shock 70 kDa protein 4 [Canis lupus familiaris] (gi|114158648)	HSPA4	gi|114158648	[2]	94 kDa	TRUE	1	8	13	10	32
Cluster of PREDICTED: proteasome subunit alpha type-6 isoform X3 [Canis lupus familiaris] (gi|545507133)	PSMA6	gi|545507133	[2]	25 kDa	TRUE	13	4	7	8	32
PREDICTED: olfactomedin-4 [Canis lupus familiaris]	OLFM4	gi|545538003		77 kDa	TRUE	1	7	13	11	32
Cluster of PREDICTED: odorant-binding protein-like [Canis lupus familiaris] (gi|545557338)	LOC100688842	gi|545557338	[3]	20 kDa	TRUE	6	12	6	8	32
Cluster of glutamine synthetase isoform 1 [Canis lupus familiaris] (gi|648216199)	GLUL	gi|648216199		47 kDa	TRUE	4	10	10	8	32
PREDICTED: ERO1-like protein alpha [Canis lupus familiaris]	ERO1A	gi|73963815		54 kDa	TRUE	4	10	8	10	32
PREDICTED: purine nucleoside phosphorylase isoform 1 [Canis lupus familiaris]	PNP	gi|73977271		32 kDa		4	6	14	8	32
PREDICTED: mammaglobin-A [Canis lupus familiaris]	LOC100855880	gi|359321930		11 kDa	TRUE	0	11	9	11	31
Cluster of PREDICTED: suprabasin isoform X3 [Canis lupus familiaris] (gi|545488891)	SBSN	gi|545488891	[3]	26 kDa	TRUE	3	10	8	10	31
PREDICTED: calpain-1 catalytic subunit isoform 1 [Canis lupus familiaris]	CAPN1	gi|73983134		81 kDa	TRUE	3	8	9	11	31
PREDICTED: hydroxyacyl-coenzyme A dehydrogenase, mitochondrial isoform X2 [Canis lupus familiaris]	HADH	gi|345795823		36 kDa		10	6	7	7	30
PREDICTED: prolyl endopeptidase [Canis lupus familiaris]	PREP	gi|545520040		80 kDa		1	8	10	11	30
PREDICTED: 60 kDa heat shock protein, mitochondrial isoform X2 [Canis lupus familiaris]	HSPD1	gi|545555745		61 kDa		5	7	8	10	30
ezrin [Canis lupus familiaris]	EZR	gi|558757359		69 kDa	TRUE	3	8	9	10	30
PREDICTED: malate dehydrogenase, cytoplasmic isoform 1 [Canis lupus familiaris]	MDH1	gi|57092971		36 kDa		2	8	7	13	30
PREDICTED: bifunctional purine biosynthesis protein PURH isoform 3 [Canis lupus familiaris]	ATIC	gi|74005449		65 kDa		4	9	5	12	30
PREDICTED: phospholipase A2 inhibitor and Ly6/PLAUR domain-containing protein [Canis lupus familiaris]	PINLYP	gi|345785677		26 kDa		2	8	7	12	29
annexin A2 [Canis lupus familiaris]	ANXA2	gi|50950177		39 kDa		3	7	11	8	29
Cluster of PREDICTED: L-lactate dehydrogenase A chain-like isoform X1 [Canis lupus familiaris] (gi|545537409)	LOC485449	gi|545537409	[5]	37 kDa	TRUE	3	5	13	8	29
Cluster of PREDICTED: matrix metalloproteinase-9 isoform X1 [Canis lupus familiaris] (gi|545539634)	MMP9	gi|545539634	[2]	78 kDa	TRUE	1	7	13	8	29
PREDICTED: alpha-2-macroglobulin-like isoform X2 [Canis lupus familiaris]	LOC611458	gi|545546414		166 kDa	TRUE	3	8	10	8	29
PREDICTED: cytoplasmic dynein 1 heavy chain 1 isoform 1 [Canis lupus familiaris]	DYNC1H1	gi|73964009		532 kDa	TRUE	10	3	9	7	29
PREDICTED: thrombospondin-1 [Canis lupus familiaris]	THBS1	gi|345794639		130 kDa	TRUE	2	9	7	10	28
Cluster of PREDICTED: kininogen-1 isoformX1 [Canis lupus familiaris] (gi|345796419)	KNG1	gi|345796419	[2]	73 kDa	TRUE	4	5	8	11	28
Cluster of PREDICTED: transgelin-2 [Canis lupus familiaris] (gi|345797882)	TAGLN2	gi|345797882	[2]	22 kDa	TRUE	5	6	7	10	28
Cluster of hemoglobin subunit alpha-like [Canis lupus familiaris] (gi|399567840)	HBA	gi|399567840	[2]	15 kDa	TRUE	4	5	11	8	28
Cluster of PREDICTED: plasminogen isoform X1 [Canis lupus familiaris] (gi|545485785)	PLG	gi|545485785		91 kDa	TRUE	0	11	8	9	28
PREDICTED: adipogenesis regulatory factor [Canis lupus familiaris]	ADIRF	gi|545495533		8 kDa		1	7	14	6	28
Cluster of PREDICTED: platelet-activating factor acetylhydrolase isoform X1 [Canis lupus familiaris] (gi|545518207)	PLA2G7	gi|545518207	[2]	53 kDa	TRUE	5	7	4	12	28
PREDICTED: fibrinogen beta chain isoform X3 [Canis lupus familiaris]	FGB	gi|545524893		56 kDa		4	6	14	4	28
PREDICTED: arylsulfatase F [Canis lupus familiaris]	ARSF	gi|545557334		66 kDa		0	7	9	12	28
phosphatidylethanolamine-binding protein 1 [Canis lupus familiaris]	PEBP1	gi|114326321		21 kDa		2	7	8	10	27
PREDICTED: LOW QUALITY PROTEIN: peroxiredoxin-6 [Canis lupus familiaris]	PRDX6	gi|345803242		25 kDa		1	4	9	13	27
Cluster of PREDICTED: serpin B5 isoform X1 [Canis lupus familiaris] (gi|545485140)	SERPINB5	gi|545485140		42 kDa	TRUE	0	6	11	10	27
PREDICTED: L-xylulose reductase [Canis lupus familiaris]	DCXR	gi|545509603		30 kDa	TRUE	3	4	9	11	27
PREDICTED: nicotinamide phosphoribosyltransferase [Canis lupus familiaris]	NAMPT	gi|545529537		63 kDa		1	7	9	10	27
PREDICTED: 14-3-3 protein beta/alpha isoform X3 [Canis lupus familiaris]	YWHAB	gi|545540855		28 kDa	TRUE	0	9	9	9	27
Cluster of PREDICTED: glutathione S-transferase Mu 3 isoformX1 [Canis lupus familiaris] (gi|57088159)	GSTM3	gi|57088159		27 kDa	TRUE	0	6	9	12	27
PREDICTED: V-type proton ATPase catalytic subunit A isoform 1 [Canis lupus familiaris]	ATP6V1A	gi|57109638		68 kDa		7	4	8	8	27
PREDICTED: zymogen granule protein 16 homolog B [Canis lupus familiaris]	ZG16B	gi|73959451		18 kDa		1	5	6	15	27
PREDICTED: fibrinogen alpha chain [Canis lupus familiaris]	FGA	gi|73978329		97 kDa		0	4	15	8	27
PREDICTED: programmed cell death 6-interacting protein isoformX1 [Canis lupus familiaris]	PDCD6IP	gi|73989664		96 kDa		5	6	8	8	27
Cluster of elongation factor 1-alpha 1 [Canis lupus familiaris] (gi|308199425)	EEF1A1	gi|308199425	[6]	50 kDa	TRUE	4	6	7	9	26
PREDICTED: LOW QUALITY PROTEIN: extracellular matrix protein 1 [Canis lupus familiaris]	ECM1	gi|345782613		61 kDa	TRUE	11	3	7	5	26
PREDICTED: calreticulin isoform 4 [Canis lupus familiaris]	CALR	gi|345787749		48 kDa	TRUE	2	7	9	8	26
Cluster of PREDICTED: phosphoglycerate mutase 1 isoform 4 [Canis lupus familiaris] (gi|345792633)	PGAM1	gi|345792633	[2]	29 kDa	TRUE	4	6	7	9	26
aspartate aminotransferase, mitochondrial [Canis lupus familiaris]	GOT2	gi|559098466		47 kDa	TRUE	4	7	8	7	26
cadherin-1 precursor [Canis lupus familiaris]	CDH1	gi|560186539		98 kDa	TRUE	4	5	7	10	26
Cluster of PREDICTED: ly6/PLAUR domain-containing protein 3 isoform X2 [Canis lupus familiaris] (gi|73948247)	LYPD3	gi|73948247		36 kDa	TRUE	6	4	7	9	26
PREDICTED: protein disulfide-isomerase [Canis lupus familiaris]	P4HB	gi|73964749		57 kDa		2	5	8	11	26
PREDICTED: cystatin-M [Canis lupus familiaris]	CST6	gi|73983654		16 kDa		2	7	9	8	26
PREDICTED: cathepsin B [Canis lupus familiaris]	CTSB	gi|345790427		38 kDa		8	5	6	6	25
PREDICTED: cathepsin L1-like isoform X2 [Canis lupus familiaris]	CTSL	gi|545486348		37 kDa	TRUE	2	5	8	10	25
PREDICTED: heat shock protein HSP 90-alpha, partial [Canis lupus familiaris]	HSP90AA1	gi|545508859		73 kDa	TRUE	4	4	10	7	25
PREDICTED: ceruloplasmin isoform X2 [Canis lupus familiaris]	CP	gi|545539301		126 kDa	TRUE	3	9	6	7	25
PREDICTED: serpin B6 isoform 2 [Canis lupus familiaris]	SERPINB6	gi|545554226		44 kDa	TRUE	3	9	4	9	25
PREDICTED: tryptophan--tRNA ligase, cytoplasmic isoformX1 [Canis lupus familiaris]	WARS	gi|57090365		54 kDa		1	5	7	12	25
PREDICTED: cytosol aminopeptidase [Canis lupus familiaris]	LAP3	gi|545493958		56 kDa		4	9	6	5	24
PREDICTED: uncharacterized protein LOC607427 [Canis lupus familiaris]	LOC607427	gi|545508906		37 kDa		4	3	8	9	24
PREDICTED: importin-5 [Canis lupus familiaris]	IPO5	gi|545537844		117 kDa	TRUE	14	2	4	4	24
PREDICTED: synaptic vesicle membrane protein VAT-1 homolog [Canis lupus familiaris]	VAT1	gi|57091463		43 kDa		1	7	6	10	24
PREDICTED: phosphoglucomutase-2 [Canis lupus familiaris]	PGM2	gi|73951890		68 kDa		2	7	5	10	24
protein S100-A8 [Canis lupus familiaris]	S100A8	gi|225784825		10 kDa	TRUE	2	5	5	11	23
peptidyl-prolyl cis-trans isomerase FKBP1A [Canis lupus familiaris]	PAL_GLEAN10024169	gi|356582240		12 kDa	TRUE	11	3	5	4	23
PREDICTED: LOW QUALITY PROTEIN: caspase-14 [Canis lupus familiaris]	CASP14	gi|359322315		28 kDa		6	4	8	5	23
neutrophil elastase precursor [Canis lupus familiaris]	ELANE	gi|50979246		30 kDa		3	2	12	6	23
PREDICTED: cytosolic non-specific dipeptidase isoform X5 [Canis lupus familiaris]	CNDP2	gi|545485046		53 kDa		1	4	9	9	23
Cluster of PREDICTED: coagulation factor V isoform X2 [Canis lupus familiaris] (gi|545504920)	F5	gi|545504920		252 kDa	TRUE	2	6	5	10	23
PREDICTED: tubulin tyrosine ligase-like family, member 12 [Canis lupus familiaris]	TTLL12	gi|545514530		74 kDa		4	6	6	7	23
dihydrolipoyl dehydrogenase, mitochondrial precursor [Canis lupus familiaris]	DLD	gi|55742732		54 kDa		9	4	4	6	23
Cluster of PREDICTED: ADP-ribosylation factor 4 isoform 2 [Canis lupus familiaris] (gi|73985218)	ARF4	gi|73985218	[5]	21 kDa	TRUE	1	7	7	8	23
Cluster of catalase [Canis lupus familiaris] (gi|50950219)	CAT	gi|50950219	[2]	60 kDa	TRUE	5	2	10	5	22
pro-epidermal growth factor precursor [Canis lupus familiaris]	EGF	gi|50978782		134 kDa	TRUE	1	6	9	6	22
PREDICTED: Golgi membrane protein 1 isoform X2 [Canis lupus familiaris]	GOLM1	gi|545486425		47 kDa		1	8	5	8	22
PREDICTED: LOW QUALITY PROTEIN: alpha-aminoadipic semialdehyde dehydrogenase [Canis lupus familiaris]	ALDH7A1	gi|545516596		61 kDa		0	7	7	8	22
fructose-bisphosphate aldolase C [Canis lupus familiaris]	ALDOC	gi|558611348		39 kDa	TRUE	0	5	9	8	22
Cluster of serpin peptidase inhibitor, clade A (alpha-1 antiproteinase, antitrypsin), member 1 precursor [Canis lupus familiaris] (gi|121583756)	SERPINA1	gi|121583756	[2]	46 kDa	TRUE	4	5	8	4	21
PREDICTED: cornulin [Canis lupus familiaris]	CRNN	gi|345782802		55 kDa		4	3	5	9	21
Cluster of PREDICTED: neutral alpha-glucosidase AB isoformX2 [Canis lupus familiaris] (gi|345783257)	GANAB	gi|345783257	[2]	106 kDa	TRUE	2	5	8	6	21
PREDICTED: proteasome subunit beta type-5 [Canis lupus familiaris]	PSMB5	gi|359320183		29 kDa		0	4	8	9	21
PREDICTED: alpha-2-HS-glycoprotein [Canis lupus familiaris]	AHSG	gi|545553759		39 kDa		8	5	3	5	21
PREDICTED: calpain small subunit 1 isoform 1 [Canis lupus familiaris]	CAPNS1	gi|73947828		28 kDa	TRUE	2	8	5	6	21
PREDICTED: succinyl-CoA:3-ketoacid coenzyme A transferase 1, mitochondrial [Canis lupus familiaris]	OXCT1	gi|73954281		65 kDa		1	4	10	6	21
Cluster of PREDICTED: carbonyl reductase [NADPH] 1 [Canis lupus familiaris] (gi|74001424)	LOC610164	gi|74001424		31 kDa	TRUE	2	5	8	6	21
PREDICTED: complement C5 [Canis lupus familiaris]	C5	gi|345777920		180 kDa	TRUE	0	7	7	6	20
PREDICTED: staphylococcal nuclease domain-containing protein 1 [Canis lupus familiaris]	SND1	gi|345780013		102 kDa		4	4	5	7	20
PREDICTED: transaldolase-like [Canis lupus familiaris]	TALDO1	gi|359321944		38 kDa		2	6	6	6	20
PREDICTED: myeloperoxidase [Canis lupus familiaris]	MPO	gi|545511447		81 kDa	TRUE	6	3	7	4	20
Cluster of PREDICTED: aldo-keto reductase family 1, member A1 (aldehyde reductase) isoform X1 [Canis lupus familiaris] (gi|545523341)	AKR1A1	gi|545523341	[2]	33 kDa	TRUE	4	5	4	7	20
Cluster of PREDICTED: pyruvate carboxylase, mitochondrial isoform X2 [Canis lupus familiaris] (gi|545530614)	PC	gi|545530614		132 kDa	TRUE	3	3	5	9	20
Cluster of PREDICTED: uncharacterized protein LOC100855594 [Canis lupus familiaris] (gi|545544650)	LOC100855594	gi|545544650	[3]	33 kDa	TRUE	2	5	7	6	20
Cluster of PREDICTED: serine/threonine-protein phosphatase 2A catalytic subunit beta isoform isoform 1 [Canis lupus familiaris] (gi|57097893)	PPP2CB	gi|57097893	[2]	36 kDa	TRUE	3	4	5	8	20
PREDICTED: peptidyl-prolyl cis-trans isomerase FKBP4 [Canis lupus familiaris]	FKBP4	gi|57106584		52 kDa		2	6	5	7	20
PREDICTED: haptoglobin isoform 2 [Canis lupus familiaris]	LOC479668	gi|73957095		38 kDa		2	4	12	2	20
Cluster of PREDICTED: STE20-like kinase isoformX1 [Canis lupus familiaris] (gi|73998466)	SLK	gi|73998466	[2]	144 kDa	TRUE	7	3	5	5	20
PREDICTED: filamin-A isoform 2 [Canis lupus familiaris]	FLNA	gi|74008809		281 kDa	TRUE	2	4	9	5	20
PREDICTED: LOW QUALITY PROTEIN: keratin, type II cytoskeletal 4 [Canis lupus familiaris]	KRT4	gi|345791820		64 kDa	TRUE	3	3	6	7	19
Cluster of PREDICTED: myosin regulatory light polypeptide 9-like isoform X2 [Canis lupus familiaris] (gi|345803346)	MYL12A	gi|345803346	[5]	20 kDa	TRUE	3	3	6	7	19
PREDICTED: CD109 antigen isoform 3 [Canis lupus familiaris]	CD109	gi|359321010		162 kDa	TRUE	0	8	5	6	19
PREDICTED: 6-phosphofructokinase, liver type [Canis lupus familiaris]	PFKL	gi|359323581		85 kDa	TRUE	4	4	5	6	19
PREDICTED: hexokinase-3 [Canis lupus familiaris]	HK3	gi|545495691		104 kDa	TRUE	3	6	5	5	19
PREDICTED: stress-induced-phosphoprotein 1 [Canis lupus familiaris]	STIP1	gi|545531041		67 kDa	TRUE	4	6	6	3	19
Cluster of PREDICTED: protein phosphatase 1 regulatory subunit 7-like, partial [Canis lupus familiaris] (gi|545560689)	LOC477430	gi|545560689	[3]	45 kDa	TRUE	10	2	2	5	19
Cluster of PREDICTED: alpha-soluble NSF attachment protein isoform 1 [Canis lupus familiaris] (gi|73947208)	NAPA	gi|73947208	[2]	33 kDa	TRUE	2	3	6	8	19
PREDICTED: sialic acid synthase isoform 1 [Canis lupus familiaris]	NANS	gi|73971430		40 kDa		6	3	4	6	19
PREDICTED: proteasome subunit beta type-1 [Canis lupus familiaris]	PSMB1	gi|73974057		26 kDa		4	4	8	3	19
PREDICTED: histidine ammonia-lyase [Canis lupus familiaris]	HAL	gi|73978213		72 kDa		7	4	6	2	19
PREDICTED: F-actin-capping protein subunit alpha-1 isoform 2 [Canis lupus familiaris]	CAPZA1	gi|73981496		33 kDa	TRUE	2	5	6	6	19
PREDICTED: polypeptide N-acetylgalactosaminyltransferase 6 isoformX2 [Canis lupus familiaris]	GALNT6	gi|73996388		71 kDa	TRUE	5	3	5	6	19
Cluster of PREDICTED: catenin alpha-1 [Canis lupus familiaris] (gi|345778074)	CTNNA1	gi|345778074	[2]	100 kDa	TRUE	1	5	6	6	18
PREDICTED: complement factor B [Canis lupus familiaris]	C2	gi|345778397		86 kDa		3	5	7	3	18
PREDICTED: arginase-1 isoform 2 [Canis lupus familiaris]	ARG1	gi|345778832		35 kDa		1	3	4	10	18
PREDICTED: LOW QUALITY PROTEIN: perilipin-3 [Canis lupus familiaris]	PLIN3	gi|345786721		48 kDa	TRUE	0	6	7	5	18
eukaryotic initiation factor 4A-I [Canis lupus familiaris]	J9NY67	gi|354623039		46 kDa	TRUE	2	5	8	3	18
PREDICTED: prothrombin [Canis lupus familiaris]	F2	gi|359321961		70 kDa	TRUE	2	8	3	5	18
heat shock protein beta-1 [Canis lupus familiaris]	HSP27	gi|50979116		23 kDa		0	5	4	9	18
Cluster of guanine nucleotide-binding protein G(i) subunit alpha-2 [Canis lupus familiaris] (gi|50979222)	GNAI2	gi|50979222	[7]	41 kDa	TRUE	5	4	4	5	18
PREDICTED: glutaredoxin-1 isoform X1 [Canis lupus familiaris]	GLRX	gi|545492676		11 kDa		10	3	3	2	18
PREDICTED: calpain-2 catalytic subunit [Canis lupus familiaris]	CAPN2	gi|545505244		76 kDa	TRUE	1	4	7	6	18
PREDICTED: putative V-set and immunoglobulin domain-containing-like protein IGHV4OR15-8-like [Canis lupus familiaris]	LOC102153768	gi|545508756		22 kDa		1	3	6	8	18
Cluster of PREDICTED: T-complex protein 1 subunit theta isoformX1 [Canis lupus familiaris] (gi|545550952)	CCT8	gi|545550952	[2]	77 kDa	TRUE	4	1	6	7	18
Cluster of PREDICTED: 3'(2'),5'-bisphosphate nucleotidase 1 isoform X1 [Canis lupus familiaris] (gi|545556722)	BPNT1	gi|545556722	[2]	41 kDa	TRUE	7	4	5	2	18
Cluster of PREDICTED: 26S proteasome non-ATPase regulatory subunit 12 isoformX1 [Canis lupus familiaris] (gi|73965259)	PSMD12	gi|73965259	[2]	53 kDa	TRUE	4	5	5	4	18
PREDICTED: stress-70 protein, mitochondrial isoform 6 [Canis lupus familiaris]	HSPA9	gi|73970888		74 kDa	TRUE	2	5	3	8	18
Cluster of PREDICTED: thioredoxin domain-containing protein 5-like [Canis lupus familiaris] (gi|73971948)	LOC474798	gi|73971948	[2]	25 kDa	TRUE	6	1	3	8	18
PREDICTED: bactericidal permeability-increasing protein isoformX1 [Canis lupus familiaris]	BPI	gi|73991968		53 kDa		4	4	6	4	18
Cluster of PREDICTED: immunoglobulin J chain isoform 1 [Canis lupus familiaris] (gi|345779666)	JCHAIN	gi|345779666	[2]	18 kDa	TRUE	0	3	10	4	17
Cluster of PREDICTED: ras-related protein Rab-11B [Canis lupus familiaris] (gi|345786671)	RAB11B	gi|345786671	[2]	24 kDa	TRUE	5	3	6	3	17
Cluster of PREDICTED: poly(U)-specific endoribonuclease isoform X4 [Canis lupus familiaris] (gi|345791912)	ENDOU	gi|345791912	[4]	47 kDa	TRUE	0	5	8	4	17
PREDICTED: neutrophil collagenase [Canis lupus familiaris]	MMP8	gi|345799783		54 kDa		2	5	5	5	17
PREDICTED: heme-binding protein 2 [Canis lupus familiaris]	HEBP2	gi|359318483		22 kDa		6	3	5	3	17
PREDICTED: acetyl-coenzyme A synthetase, cytoplasmic isoform 2 [Canis lupus familiaris]	ACSS2	gi|359322734		81 kDa		0	5	6	6	17
PREDICTED: actin-related protein 2/3 complex subunit 3 [Canis lupus familiaris]	ARC21	gi|359322935		21 kDa		1	4	7	5	17
PREDICTED: interleukin-36 beta [Canis lupus familiaris]	IL36B	gi|545527884		19 kDa		2	2	4	9	17
Cluster of PREDICTED: bifunctional ATP-dependent dihydroxyacetone kinase/FAD-AMP lyase (cyclizing) isoform X1 [Canis lupus familiaris] (gi|545531348)	TKFC	gi|545531348	[2]	59 kDa	TRUE	3	3	4	7	17
Cluster of PREDICTED: alpha-2-macroglobulin isoform X1 [Canis lupus familiaris] (gi|545546416)	A2M	gi|545546416	[2]	165 kDa	TRUE	0	3	9	5	17
PREDICTED: transthyretin isoform 2 [Canis lupus familiaris]	TTR	gi|57089193		16 kDa	TRUE	0	3	9	5	17
PREDICTED: insulin-like growth factor binding protein 7 isoform 1 [Canis lupus familiaris]	IGFBP7	gi|73975083		29 kDa		0	7	4	6	17
PREDICTED: protein disulfide-isomerase A6 [Canis lupus familiaris]	PDIA6	gi|73980394		48 kDa		6	3	4	4	17
PREDICTED: alcohol dehydrogenase 4 isoform 2 [Canis lupus familiaris]	ADH4	gi|74002001		41 kDa		5	4	3	5	17
PREDICTED: calmodulin isoform 2 [Canis lupus familiaris]	CALM1	gi|345777291		17 kDa	TRUE	2	4	5	5	16
PREDICTED: annexin A11 [Canis lupus familiaris]	ANXA11	gi|345799231		54 kDa	TRUE	3	5	3	5	16
Cluster of ubiquitin thioesterase OTUB1 [Canis lupus familiaris] (gi|354542529)	OTUB1	gi|354542529	[2]	31 kDa	TRUE	5	3	5	3	16
PREDICTED: UDP-glucose 4-epimerase [Canis lupus familiaris]	GALE	gi|359318939		38 kDa		2	5	4	5	16
PREDICTED: neutrophil cytosol factor 1 [Canis lupus familiaris]	NCF1	gi|359319611		45 kDa		1	3	8	4	16
PREDICTED: 14-3-3 protein eta [Canis lupus familiaris]	YWHAH	gi|359322978		28 kDa	TRUE	2	3	6	5	16
Cluster of serine/threonine-protein phosphatase PP1-beta catalytic subunit [Canis lupus familiaris] (gi|50978672)	PPP1CB	gi|50978672	[4]	37 kDa	TRUE	1	4	5	6	16
PREDICTED: serine/threonine-protein phosphatase 2A 65 kDa regulatory subunit A alpha isoform isoform X3 [Canis lupus familiaris]	PPP2R1A	gi|545487521		65 kDa	TRUE	4	3	4	5	16
PREDICTED: serine hydroxymethyltransferase, cytosolic isoform X4 [Canis lupus familiaris]	SHMT1	gi|545498396		53 kDa		2	6	5	3	16
Cluster of PREDICTED: homeodomain-only protein isoform X2 [Canis lupus familiaris] (gi|545521607)	HOPX	gi|545521607	[2]	9 kDa	TRUE	1	5	4	6	16
Cluster of PREDICTED: proteasome subunit beta type-4 isoform X1 [Canis lupus familiaris] (gi|545528918)	PSMB4	gi|545528918		29 kDa	TRUE	5	3	4	4	16
Cluster of PREDICTED: dipeptidyl peptidase 3 isoform X7 [Canis lupus familiaris] (gi|545530684)	DPP3	gi|545530684	[3]	81 kDa	TRUE	4	2	3	7	16
PREDICTED: UDP-glucose:glycoprotein glucosyltransferase 1 [Canis lupus familiaris]	UGGT1	gi|545531873		176 kDa	TRUE	1	3	6	6	16
Cluster of PREDICTED: T-complex protein 1 subunit alpha isoformX1 [Canis lupus familiaris] (gi|57032236)	TCP1	gi|57032236	[2]	60 kDa	TRUE	7	2	4	3	16
aspartate aminotransferase, cytoplasmic [Canis lupus familiaris]	GOT1	gi|588282757		46 kDa		3	5	2	6	16
PREDICTED: c-1-tetrahydrofolate synthase, cytoplasmic isoform X2 [Canis lupus familiaris]	MTHFD1	gi|73964198		101 kDa	TRUE	0	1	8	7	16
Cluster of PREDICTED: cytosolic 5'-nucleotidase 3A isoformX2 [Canis lupus familiaris] (gi|73976241)	NT5C3A	gi|73976241	[2]	37 kDa	TRUE	5	4	4	3	16
Cluster of PREDICTED: reelin isoformX3 [Canis lupus familiaris] (gi|73981806)	RELN	gi|73981806	[2]	390 kDa	TRUE	5	5	2	4	16
PREDICTED: adenosylhomocysteinase isoform 1 [Canis lupus familiaris]	AHCY	gi|73991635		48 kDa		0	3	5	8	16
PREDICTED: ornithine aminotransferase, mitochondrial isoformX2 [Canis lupus familiaris]	OAT	gi|73998802		48 kDa		3	4	4	5	16
Cluster of PREDICTED: actin-related protein 3 isoform 2 [Canis lupus familiaris] (gi|345784150)	ACTR3	gi|345784150		42 kDa	TRUE	1	3	5	6	15
Cluster of PREDICTED: folate receptor beta isoform X2 [Canis lupus familiaris] (gi|345788357)	FOLR2	gi|345788357	[3]	30 kDa	TRUE	3	3	4	5	15
nascent polypeptide-associated complex subunit alpha [Canis lupus familiaris]	NACA	gi|356582418		23 kDa		3	3	5	4	15
PREDICTED: creatine kinase B-type [Canis lupus familiaris]	CKB	gi|359320104		43 kDa	TRUE	3	5	4	3	15
PREDICTED: trifunctional purine biosynthetic protein adenosine-3-like isoform X1 [Canis lupus familiaris]	LOC100856570	gi|359323540		108 kDa		3	3	6	3	15
Cluster of PREDICTED: ribonuclease T2 isoform X1 [Canis lupus familiaris] (gi|545485819)	RNASET2	gi|545485819	[2]	29 kDa	TRUE	3	4	3	5	15
PREDICTED: CD177 antigen [Canis lupus familiaris]	CD177	gi|545489321		45 kDa		2	3	8	2	15
PREDICTED: prelamin-A/C [Canis lupus familiaris]	LMNA	gi|545505400		74 kDa	TRUE	1	4	7	3	15
PREDICTED: protein S100-A9 isoformX3 [Canis lupus familiaris]	S100A9	gi|545505723		23 kDa		2	4	1	8	15
Cluster of PREDICTED: nucleotide exchange factor SIL1 isoform X1 [Canis lupus familiaris] (gi|545516999)	SIL1	gi|545516999	[2]	55 kDa	TRUE	2	4	4	5	15
PREDICTED: fibrinogen gamma chain isoform X2 [Canis lupus familiaris]	FGG	gi|545524897	(+1)	50 kDa		3	1	8	3	15
Cluster of PREDICTED: transforming protein RhoA isoform X1 [Canis lupus familiaris] (gi|545533091)	RHOA	gi|545533091	[3]	22 kDa	TRUE	1	5	4	5	15
Cluster of PREDICTED: biotinidase isoform X3 [Canis lupus familiaris] (gi|545538857)	BTD	gi|545538857	[3]	60 kDa	TRUE	2	3	4	6	15
Cluster of PREDICTED: E3 ubiquitin-protein ligase HUWE1 isoform X4 [Canis lupus familiaris] (gi|545558211)	HUWE1	gi|545558211	[2]	485 kDa	TRUE	7	3	2	3	15
Cluster of vimentin [Canis lupus familiaris] (gi|559098393)	VIM	gi|559098393	[2]	54 kDa	TRUE	2	4	7	2	15
PREDICTED: fumarate hydratase, mitochondrial isoform 1 [Canis lupus familiaris]	FH	gi|57089039		54 kDa		2	4	6	3	15
PREDICTED: Golgi apparatus protein 1 isoform 1 [Canis lupus familiaris]	GLG1	gi|73957014		135 kDa	TRUE	2	5	4	4	15
PREDICTED: UPF0556 protein C19orf10 homolog [Canis lupus familiaris]	MYDGF	gi|73987359		19 kDa		3	5	4	3	15
PREDICTED: transcobalamin-1 [Canis lupus familiaris]	TCN1	gi|73988957		48 kDa		0	5	5	5	15
Cluster of PREDICTED: myosin light polypeptide 6 isoform 3 [Canis lupus familiaris] (gi|345776592)	MYL6	gi|345776592	[2]	17 kDa	TRUE	0	4	3	7	14
PREDICTED: LOW QUALITY PROTEIN: nicotinate phosphoribosyltransferase [Canis lupus familiaris]	NAPRT	gi|345779531		58 kDa		2	4	5	3	14
PREDICTED: deoxynucleoside triphosphate triphosphohydrolase SAMHD1 isoform X2 [Canis lupus familiaris]	SAMHD1	gi|345789628		72 kDa		6	0	6	2	14
Cluster of glutathione S-transferase pi 1 [Canis lupus familiaris] (gi|356461051)	GSTP1	gi|356461051	[5]	24 kDa	TRUE	5	2	5	2	14
PREDICTED: LOW QUALITY PROTEIN: angiotensin-converting enzyme [Canis lupus familiaris]	ACE	gi|359320273		151 kDa	TRUE	1	3	5	5	14
PREDICTED: cystatin-C-like [Canis lupus familiaris]	LOC607874	gi|359322597		16 kDa		6	3	2	3	14
PREDICTED: NSFL1 cofactor p47 isoform 1 [Canis lupus familiaris]	NSFL1C	gi|359322719		41 kDa		2	2	5	5	14
PREDICTED: gamma-glutamyl hydrolase [Canis lupus familiaris]	GGH	gi|359323312		36 kDa		1	2	7	4	14
Cluster of PREDICTED: EPS8-like 1 isoform X3 [Canis lupus familiaris] (gi|545487374)	EPS8L1	gi|545487374	[2]	79 kDa	TRUE	1	6	2	5	14
Cluster of PREDICTED: 6-phosphofructokinase type C isoform X1 [Canis lupus familiaris] (gi|545490115)	PFKP	gi|545490115	[2]	91 kDa	TRUE	2	3	3	6	14
Cluster of PREDICTED: protein diaphanous homolog 1 isoform X2 [Canis lupus familiaris] (gi|545490423)	DIAPH1	gi|545490423	[3]	141 kDa	TRUE	6	2	3	3	14
PREDICTED: gamma-synuclein [Canis lupus familiaris]	SNCG	gi|545496542		14 kDa		1	3	4	6	14
Cluster of PREDICTED: glycogen debranching enzyme isoform X3 [Canis lupus familiaris] (gi|545501560)	AGL	gi|545501560	[2]	175 kDa	TRUE	9	0	3	2	14
PREDICTED: brain-specific serine protease 4 [Canis lupus familiaris]	PRSS22	gi|545503696		36 kDa		3	4	3	4	14
Cluster of PREDICTED: keratin, type I cytoskeletal 13 isoform 1 [Canis lupus familiaris] (gi|545510672)	LOC490983	gi|545510672	[2]	49 kDa	TRUE	4	3	7	0	14
PREDICTED: glyoxylate reductase/hydroxypyruvate reductase [Canis lupus familiaris]	GRHPR	gi|545517618		35 kDa		0	3	4	7	14
Cluster of PREDICTED: sorcin isoform X2 [Canis lupus familiaris] (gi|545522277)	SRI	gi|545522277	[2]	31 kDa	TRUE	2	3	8	1	14
Cluster of PREDICTED: ATP-dependent RNA helicase DDX39A isoform X2 [Canis lupus familiaris] (gi|545534430)	DDX39A	gi|545534430	[4]	49 kDa	TRUE	1	3	5	5	14
PREDICTED: nucleobindin-2 isoform X1 [Canis lupus familiaris]	NUCB2	gi|545536949		50 kDa	TRUE	1	2	7	4	14
PREDICTED: bifunctional 3'-phosphoadenosine 5'-phosphosulfate synthase 2 [Canis lupus familiaris]	PAPSS2	gi|545545052		87 kDa	TRUE	1	3	4	6	14
PREDICTED: F-box only protein 50 [Canis lupus familiaris]	NCCRP1	gi|73948372		30 kDa		1	3	3	7	14
PREDICTED: dihydropteridine reductase isoform 2 [Canis lupus familiaris]	QDPR	gi|73951412		26 kDa		4	2	4	4	14
PREDICTED: ATP synthase subunit beta, mitochondrial isoform 1 [Canis lupus familiaris]	ATP5B	gi|73968432		56 kDa		4	1	5	4	14
PREDICTED: protein FAM3C [Canis lupus familiaris]	FAM3C	gi|73976651		25 kDa		0	4	4	6	14
Cluster of PREDICTED: dynactin subunit 1 isoformX4 [Canis lupus familiaris] (gi|73980481)	DCTN1	gi|73980481	[2]	139 kDa	TRUE	7	1	4	2	14
Cluster of PREDICTED: ras-related protein Rab-1B isoformX1 [Canis lupus familiaris] (gi|73983002)	RAB1B	gi|73983002	[2]	22 kDa	TRUE	7	1	4	2	14
Cluster of PREDICTED: heterogeneous nuclear ribonucleoprotein D0 isoformX1 [Canis lupus familiaris] (gi|74001707)	HNRNPD	gi|74001707	[2]	36 kDa	TRUE	5	1	5	3	14
Cluster of PREDICTED: drebrin-like isoformX7 [Canis lupus familiaris] (gi|74010705)	DBNL	gi|74010705	[2]	48 kDa	TRUE	2	2	5	5	14
alkaline phosphatase, tissue-nonspecific isozyme [Canis lupus familiaris]	ALPL	gi|308199470	(+1)	57 kDa		1	2	3	7	13
PREDICTED: vacuolar protein sorting-associated protein 35 isoformX1 [Canis lupus familiaris]	VPS35	gi|345780714		92 kDa	TRUE	2	2	4	5	13
PREDICTED: BCL2-like 15 [Canis lupus familiaris]	BCL2L15	gi|345782741		18 kDa		1	3	5	4	13
PREDICTED: acetyl-CoA acetyltransferase, cytosolic [Canis lupus familiaris]	ACAT2	gi|345784720		41 kDa		1	4	3	5	13
PREDICTED: coatomer subunit beta isoform X2 [Canis lupus familiaris]	COPB1	gi|345787834		107 kDa		3	1	5	4	13
Cluster of PREDICTED: glycogen phosphorylase, brain form isoform X3 [Canis lupus familiaris] (gi|345789118)	PYGB	gi|345789118	[2]	97 kDa	TRUE	3	3	5	2	13
PREDICTED: peptidyl-glycine alpha-amidating monooxygenase [Canis lupus familiaris]	PAM	gi|345798723		106 kDa		1	5	2	5	13
Cluster of PREDICTED: T-complex protein 1 subunit gamma isoform 6 [Canis lupus familiaris] (gi|345802577)	CCT3	gi|345802577	[2]	56 kDa	TRUE	4	0	3	6	13
Cluster of ribosomal protein SA [Canis lupus familiaris] (gi|356582349)	RPSA	gi|356582349	[3]	33 kDa	TRUE	3	5	4	1	13
Cluster of PREDICTED: UMP-CMP kinase isoform 2 [Canis lupus familiaris] (gi|359321356)	CMPK1	gi|359321356	[2]	26 kDa	TRUE	4	4	2	3	13
PREDICTED: translin [Canis lupus familiaris]	TSN	gi|359321993		26 kDa		6	2	3	2	13
copper transport protein ATOX1 [Canis lupus familiaris]	ATOX1	gi|50978826		7 kDa	TRUE	3	2	4	4	13
PREDICTED: plasma alpha-L-fucosidase [Canis lupus familiaris]	FUCA2	gi|545486146		57 kDa		4	2	4	3	13
Cluster of PREDICTED: soluble calcium-activated nucleotidase 1 isoform X2 [Canis lupus familiaris] (gi|545509199)	LOC483345	gi|545509199	[3]	94 kDa	TRUE	1	3	4	5	13
Cluster of PREDICTED: 26S protease regulatory subunit 8 isoform X2 [Canis lupus familiaris] (gi|545509909)	PSMC5	gi|545509909	[2]	51 kDa	TRUE	2	3	3	5	13
PREDICTED: junction plakoglobin isoform X11 [Canis lupus familiaris]	JUP	gi|545510646		82 kDa	TRUE	2	3	5	3	13
PREDICTED: platelet-activating factor acetylhydrolase IB subunit alpha isoform X3 [Canis lupus familiaris]	PAFAH1B1	gi|545512200		47 kDa		1	1	6	5	13
Cluster of PREDICTED: spectrin alpha chain, non-erythrocytic 1 isoform X1 [Canis lupus familiaris] (gi|545513097)	SPTAN1	gi|545513097	[2]	289 kDa	TRUE	4	0	4	5	13
PREDICTED: cullin-associated NEDD8-dissociated protein 1 isoform X6 [Canis lupus familiaris]	CAND1	gi|545514014		134 kDa	TRUE	2	2	4	5	13
Cluster of PREDICTED: T-complex protein 1 subunit delta isoform X2 [Canis lupus familiaris] (gi|545515717)	CCT4	gi|545515717	[2]	58 kDa	TRUE	7	2	2	2	13
Cluster of PREDICTED: filaggrin isoform X2 [Canis lupus familiaris] (gi|545528975)	FLG	gi|545528975		308 kDa	TRUE	2	3	5	3	13
PREDICTED: proteasome subunit alpha type-2 isoform 1 [Canis lupus familiaris]	PSMA2	gi|545529262		32 kDa		4	4	3	2	13
Cluster of PREDICTED: secretoglobin family 1D member-like [Canis lupus familiaris] (gi|545531237)	LOC100687441	gi|545531237	[2]	10 kDa	TRUE	2	2	6	3	13
PREDICTED: ribonuclease inhibitor [Canis lupus familiaris]	RNH1	gi|545531429		46 kDa		3	3	4	3	13
Cluster of PREDICTED: DnaJ (Hsp40) homolog, subfamily B, member 11 isoform X2 [Canis lupus familiaris] (gi|545553745)	DNAJB11	gi|545553745	[2]	39 kDa	TRUE	6	3	2	2	13
PREDICTED: endoplasmic reticulum resident protein 44-like, partial [Canis lupus familiaris]	LOC606772	gi|545560857		18 kDa	TRUE	1	2	5	5	13
Cluster of ferritin light chain [Canis lupus familiaris] (gi|66864897)	FTL	gi|66864897	[2]	20 kDa	TRUE	3	1	7	2	13
Cluster of PREDICTED: phosphoglucomutase-1 isoform 4 [Canis lupus familiaris] (gi|73956158)	PGM1	gi|73956158	[2]	61 kDa	TRUE	2	3	3	5	13
PREDICTED: cystathionine gamma-lyase [Canis lupus familiaris]	CTH	gi|73960182		44 kDa		3	2	3	5	13
Cluster of PREDICTED: ubiquitin carboxyl-terminal hydrolase 14 isoformX2 [Canis lupus familiaris] (gi|73961834)	USP14	gi|73961834	[2]	61 kDa	TRUE	1	2	5	5	13
PREDICTED: proliferation-associated protein 2G4 [Canis lupus familiaris]	PA2G4	gi|73968311		44 kDa		9	0	1	3	13
PREDICTED: aconitate hydratase, mitochondrial isoform 3 [Canis lupus familiaris]	ACO2	gi|73968966		86 kDa		1	4	4	4	13
PREDICTED: myristoylated alanine-rich C-kinase substrate [Canis lupus familiaris]	MARCKS	gi|73974023		33 kDa	TRUE	3	5	3	2	13
Cluster of PREDICTED: d-3-phosphoglycerate dehydrogenase-like [Canis lupus familiaris] (gi|73981343)	J9P120	gi|73981343	[2]	57 kDa	TRUE	0	3	3	7	13
PREDICTED: elongation factor 1-gamma isoform 1 [Canis lupus familiaris]	EEF1G	gi|73983414		50 kDa		2	2	4	5	13
Cluster of PREDICTED: aldehyde dehydrogenase, mitochondrial isoform 2 [Canis lupus familiaris] (gi|73995214)	ALDH2	gi|73995214	[2]	57 kDa	TRUE	0	2	5	6	13
PREDICTED: glutaredoxin-3 [Canis lupus familiaris]	GLRX3	gi|73999010		37 kDa		2	3	3	5	13
PREDICTED: peptidyl-prolyl cis-trans isomerase B isoform 2 [Canis lupus familiaris]	PPIB	gi|74000476		24 kDa	TRUE	3	1	6	3	13
PREDICTED: electron transfer flavoprotein subunit alpha, mitochondrial isoform 1 [Canis lupus familiaris]	ETFA	gi|74000809		35 kDa		0	3	5	5	13
Cluster of PREDICTED: xaa-Pro dipeptidase isoformX2 [Canis lupus familiaris] (gi|345785177)	PEPD	gi|345785177	[2]	50 kDa	TRUE	4	1	4	3	12
Cluster of PREDICTED: 26S proteasome non-ATPase regulatory subunit 1 isoform X1 [Canis lupus familiaris] (gi|345790644)	PSMD1	gi|345790644	[2]	106 kDa	TRUE	3	2	5	2	12
L-lactate dehydrogenase B chain [Canis lupus familiaris]	LDHB	gi|356461040		37 kDa	TRUE	0	3	3	6	12
Cluster of peroxiredoxin-1 [Canis lupus familiaris] (gi|356461044)	PRDX1	gi|356461044	[2]	22 kDa	TRUE	2	3	3	4	12
Cluster of PREDICTED: vasodilator-stimulated phosphoprotein isoform X1 [Canis lupus familiaris] (gi|545486243)	VASP	gi|545486243	[2]	41 kDa	TRUE	8	0	4	0	12
Cluster of PREDICTED: hypoxia up-regulated protein 1 isoform X2 [Canis lupus familiaris] (gi|545497158)	HYOU1	gi|545497158	[2]	111 kDa	TRUE	2	2	4	4	12
PREDICTED: importin subunit beta-1 isoform X2 [Canis lupus familiaris]	PAL_GLEAN10019656	gi|545511024	(+1)	97 kDa		2	3	2	5	12
Cluster of PREDICTED: AP-1 complex subunit beta-1 isoform X4 [Canis lupus familiaris] (gi|545511704)	AP2B1	gi|545511704	[4]	105 kDa	TRUE	1	3	3	5	12
Cluster of PREDICTED: T-complex protein 1 subunit beta isoform X2 [Canis lupus familiaris] (gi|545514075)	CCT2	gi|545514075	[2]	62 kDa	TRUE	3	1	4	4	12
Cluster of PREDICTED: coatomer subunit epsilon isoform X3 [Canis lupus familiaris] (gi|545534093)	COPE	gi|545534093	[2]	35 kDa	TRUE	4	2	3	3	12
PREDICTED: exportin-2 isoform X5 [Canis lupus familiaris]	CSE1L	gi|545540994		111 kDa		5	1	2	4	12
PREDICTED: heat shock protein 105 kDa [Canis lupus familiaris]	HSPH1	gi|545542136		112 kDa	TRUE	2	2	4	4	12
Cluster of PREDICTED: phosphatidylinositol-glycan-specific phospholipase D isoform X2 [Canis lupus familiaris] (gi|545554529)	GPLD1	gi|545554529	[2]	93 kDa	TRUE	1	3	5	3	12
Cluster of PREDICTED: moesin isoform X5 [Canis lupus familiaris] (gi|545558309)	MSN	gi|545558309	[2]	70 kDa	TRUE	0	2	5	5	12
poliovirus receptor-related protein 1 precursor [Canis lupus familiaris]	PVRL1	gi|560186504		57 kDa		2	3	4	3	12
Cluster of PREDICTED: nuclear transport factor 2 isoform 1 [Canis lupus familiaris] (gi|57087201)	NUTF2	gi|57087201	[2]	14 kDa	TRUE	2	3	3	4	12
Cluster of PREDICTED: poly(rC)-binding protein 1 isoform 1 [Canis lupus familiaris] (gi|57093423)	PCBP1	gi|57093423	[7]	37 kDa	TRUE	1	3	4	4	12
PREDICTED: elongation factor 1-beta isoform 1 [Canis lupus familiaris]	PANDA_009281	gi|57110955		25 kDa	TRUE	2	3	4	3	12
Cluster of PREDICTED: ubiquilin-1 isoform 6 [Canis lupus familiaris] (gi|73946510)	UBQLN1	gi|73946510	[2]	59 kDa	TRUE	0	3	5	4	12
PREDICTED: 26S proteasome non-ATPase regulatory subunit 3 [Canis lupus familiaris]	PSMD3	gi|73966003		61 kDa		1	4	4	3	12
PREDICTED: 2-amino-3-ketobutyrate coenzyme A ligase, mitochondrial [Canis lupus familiaris]	GCAT	gi|73969698		45 kDa		0	2	5	5	12
PREDICTED: cytoplasmic aconitate hydratase [Canis lupus familiaris]	ACO1	gi|73971731		98 kDa		0	5	2	5	12
PREDICTED: delta-aminolevulinic acid dehydratase [Canis lupus familiaris]	ALAD	gi|73971984		36 kDa		3	2	1	6	12
PREDICTED: glutamate--cysteine ligase catalytic subunit isoformX1 [Canis lupus familiaris]	GCLC	gi|73973063		73 kDa		1	0	4	7	12
PREDICTED: 5'-nucleotidase [Canis lupus familiaris]	NT5E	gi|73973882		59 kDa		0	2	4	6	12
PREDICTED: fibroleukin [Canis lupus familiaris]	FGL2	gi|73981826		49 kDa		7	1	3	1	12
Cluster of PREDICTED: 3-hydroxyacyl-CoA dehydrogenase type-2 isoform 1 [Canis lupus familiaris] (gi|74006997)	HSD17B10	gi|74006997	[2]	27 kDa	TRUE	4	3	3	2	12
PREDICTED: LOW QUALITY PROTEIN: thioredoxin-like 1 [Canis lupus familiaris]	TXNL1	gi|345784434		32 kDa		1	1	5	4	11
Cluster of PREDICTED: keratin, type II cytoskeletal 6A [Canis lupus familiaris] (gi|345791910)	LOC100687987	gi|345791910	[3]	61 kDa	TRUE	0	1	5	5	11
PREDICTED: syntenin-1 isoformX2 [Canis lupus familiaris]	SDCBP	gi|345793056		32 kDa		4	1	3	3	11
PREDICTED: 1,4-alpha-glucan-branching enzyme [Canis lupus familiaris]	GBE1	gi|345795481		81 kDa		0	4	3	4	11
PREDICTED: 26S proteasome non-ATPase regulatory subunit 2 [Canis lupus familiaris]	PSMD2	gi|345796375		100 kDa		0	2	5	4	11
PREDICTED: coronin-1A isoform 1 [Canis lupus familiaris]	CORO1A	gi|345801939		51 kDa	TRUE	2	4	2	3	11
26S protease regulatory subunit 4 [Canis lupus familiaris]	PSMC1	gi|354459384		49 kDa	TRUE	4	1	4	2	11
quinone oxidoreductase [Canis lupus familiaris]	CRYZ	gi|356991198		36 kDa		5	2	2	2	11
PREDICTED: Na(+)/H(+) exchange regulatory cofactor NHE-RF1 [Canis lupus familiaris]	SLC9A3R1	gi|359320259		39 kDa		0	3	4	4	11
PREDICTED: heterogeneous nuclear ribonucleoprotein K isoform X1 [Canis lupus familiaris]	HNRNPK	gi|545486213		51 kDa		1	4	3	3	11
Cluster of PREDICTED: histidine--tRNA ligase, cytoplasmic isoform X2 [Canis lupus familiaris] (gi|545490368)	HARS	gi|545490368	[4]	58 kDa	TRUE	3	1	3	4	11
Cluster of PREDICTED: F-actin-capping protein subunit beta isoform X2 [Canis lupus familiaris] (gi|545492081)	CAPZB	gi|545492081	[2]	41 kDa	TRUE	0	4	4	3	11
PREDICTED: LOW QUALITY PROTEIN: 14-3-3 protein gamma [Canis lupus familiaris]	YWHAG	gi|545500683		28 kDa	TRUE	0	4	3	4	11
Cluster of PREDICTED: membrane cofactor protein isoform X6 [Canis lupus familiaris] (gi|545504284)	LOC609365	gi|545504284	[3]	40 kDa	TRUE	1	4	4	2	11
Cluster of PREDICTED: polyadenylate-binding protein 1 isoform X7 [Canis lupus familiaris] (gi|545520482)	PABPC1	gi|545520482	[4]	70 kDa	TRUE	2	1	6	2	11
PREDICTED: GDP-L-fucose synthase isoform X1 [Canis lupus familiaris]	TSTA3	gi|545521121		36 kDa		2	3	2	4	11
PREDICTED: transmembrane protease serine 11B-like protein-like [Canis lupus familiaris]	LOC482175	gi|545521679		47 kDa		0	4	4	3	11
Cluster of gi|545537679|ref|XP_005634030.1| PREDICTED: ubiquitin carboxyl-terminal hydrolase isozyme L3 isoform X1 [Canis lupus familiaris] (gi|545537679|ref|XP_005634030.1| PREDICTED: ubiquitin carboxyl-terminal hydrolase isozyme L3 isoform X1 [Canis lupus familiaris]-DECOY)	UCHL3	gi|545537679	|ref|XP_005634030.1| PREDICTED: ubiquitin carboxyl-terminal hydrolase isozyme L3 isoform X1 [Canis lupus familiaris]-DECOY [2]	?	TRUE	0	1	6	4	11
PREDICTED: glutathione synthetase isoform X3 [Canis lupus familiaris]	GSS	gi|545540445		52 kDa		0	2	4	5	11
PREDICTED: mannose-6-phosphate isomerase isoform 1 [Canis lupus familiaris]	MPI	gi|545550512		60 kDa		1	5	2	3	11
Cluster of gi|545552244|ref|XP_005639326.1| PREDICTED: complement factor I isoform X5 [Canis lupus familiaris] (gi|545552244|ref|XP_005639326.1| PREDICTED: complement factor I isoform X5 [Canis lupus familiaris]-DECOY)	CFI	gi|545552244	|ref|XP_005639326.1| PREDICTED: complement factor I isoform X5 [Canis lupus familiaris]-DECOY [3]	?	TRUE	0	1	4	6	11
PREDICTED: GDP-mannose 4,6 dehydratase [Canis lupus familiaris]	GMDS	gi|545554775		43 kDa		2	3	3	3	11
procollagen-lysine,2-oxoglutarate 5-dioxygenase 1 precursor [Canis lupus familiaris]	PLOD1	gi|548923733		84 kDa	TRUE	0	3	4	4	11
Cluster of PREDICTED: proteasome activator complex subunit 1 isoform X3 [Canis lupus familiaris] (gi|57090023)	PSME1	gi|57090023	[2]	29 kDa	TRUE	2	2	4	3	11
PREDICTED: succinyl-CoA ligase [GDP-forming] subunit beta, mitochondrial [Canis lupus familiaris]	SUCLG2	gi|57100954		47 kDa	TRUE	3	4	2	2	11
Cluster of PREDICTED: creatine kinase U-type, mitochondrial isoform 1 [Canis lupus familiaris] (gi|57108147)	CKMT1B	gi|57108147	[2]	47 kDa	TRUE	4	2	2	3	11
PREDICTED: peptidoglycan recognition protein 1 [Canis lupus familiaris]	PGLYRP1	gi|73948128		22 kDa		4	3	2	2	11
PREDICTED: aminopeptidase B [Canis lupus familiaris]	RNPEP	gi|73960289		72 kDa		3	1	3	4	11
PREDICTED: glyoxalase domain-containing protein 4 isoform 1 [Canis lupus familiaris]	GLOD4	gi|73967136		33 kDa		2	2	3	4	11
Cluster of PREDICTED: protein NDRG2 isoformX1 [Canis lupus familiaris] (gi|73977281)	NDRG2	gi|73977281	[2]	41 kDa	TRUE	1	1	4	5	11
PREDICTED: 1-phosphatidylinositol 4,5-bisphosphate phosphodiesterase delta-1 isoform 1 [Canis lupus familiaris]	PLCD1	gi|73989722		88 kDa		2	1	5	3	11
PREDICTED: complement factor H isoform 2 [Canis lupus familiaris]	LOC478952	gi|74005944		140 kDa	TRUE	0	3	4	4	11
CD5 antigen-like precursor [Canis lupus familiaris]	CD5L	gi|820375799		38 kDa		1	3	3	4	11
Cluster of pigment epithelium-derived factor [Canis lupus familiaris] (gi|119637837)	SERPINF1	gi|119637837	[2]	44 kDa	TRUE	1	3	4	2	10
PREDICTED: carbonyl reductase [NADPH] 3 [Canis lupus familiaris]	CBR3	gi|345795417		31 kDa	TRUE	3	0	5	2	10
PREDICTED: desmocollin-3 [Canis lupus familiaris]	DSC3	gi|345803051		121 kDa	TRUE	0	2	3	5	10
Cluster of 40S ribosomal protein S27a [Canis lupus familiaris] (gi|356582340)	RPS27A	gi|356582340	[3]	18 kDa	TRUE	1	2	4	3	10
Cluster of PREDICTED: heterogeneous nuclear ribonucleoprotein L isoform X1 [Canis lupus familiaris] (gi|359318672)	HNRNPL	gi|359318672	[2]	64 kDa	TRUE	4	1	3	2	10
PREDICTED: proteasome subunit alpha type-5 [Canis lupus familiaris]	Psma5	gi|359319848		26 kDa		1	2	3	4	10
Cluster of hypoxanthine-guanine phosphoribosyltransferase [Canis lupus familiaris] (gi|50979220)	HPRT	gi|50979220	[2]	24 kDa	TRUE	2	2	2	4	10
Cluster of PREDICTED: V-set and immunoglobulin domain containing 10 like isoform X1 [Canis lupus familiaris] (gi|545487574)	VSIG10L	gi|545487574	[2]	99 kDa	TRUE	2	1	3	4	10
PREDICTED: urokinase plasminogen activator surface receptor isoform 1 [Canis lupus familiaris]	PLAUR	gi|545488274		40 kDa		1	2	5	2	10
PREDICTED: acid sphingomyelinase-like phosphodiesterase 3b [Canis lupus familiaris]	SMPDL3B	gi|545491592		51 kDa		1	1	4	4	10
PREDICTED: angiotensinogen [Canis lupus familiaris]	AGT	gi|545494757		52 kDa		0	2	4	4	10
Cluster of PREDICTED: sortilin isoform X1 [Canis lupus familiaris] (gi|545502964)	SORT1	gi|545502964	[2]	91 kDa	TRUE	2	2	3	3	10
PREDICTED: acyl-CoA synthetase family member 2, mitochondrial [Canis lupus familiaris]	ACSF2	gi|545512308		74 kDa		0	3	4	3	10
PREDICTED: alpha-N-acetylgalactosaminidase isoform X2 [Canis lupus familiaris]	NAGA	gi|545514634		46 kDa		3	2	2	3	10
PREDICTED: guanine nucleotide binding protein (G protein), beta polypeptide 2-like 1 [Canis lupus familiaris]	GNB2L1	gi|545516103		35 kDa		0	2	5	3	10
PREDICTED: protein NDRG1 [Canis lupus familiaris]	NDRG1	gi|545520933		42 kDa	TRUE	1	4	3	2	10
Cluster of PREDICTED: uncharacterized protein LOC475115 isoformX5 [Canis lupus familiaris] (gi|545521114)	LOC475115	gi|545521114	[3]	68 kDa	TRUE	2	1	4	3	10
Cluster of PREDICTED: plectin isoform X9 [Canis lupus familiaris] (gi|545521155)	PLEC	gi|545521155	[10]	534 kDa	TRUE	0	2	7	1	10
PREDICTED: ribonuclease 4 isoform X2 [Canis lupus familiaris]	RNASE4	gi|545524180		23 kDa		7	0	1	2	10
Cluster of PREDICTED: peroxiredoxin-5, mitochondrial isoform X2 [Canis lupus familiaris] (gi|545531000)	PRDX5	gi|545531000	[2]	17 kDa	TRUE	6	0	2	2	10
PREDICTED: uteroglobin [Canis lupus familiaris]	SCGB1A1	gi|545531229		10 kDa		0	2	5	3	10
Cluster of PREDICTED: syntaxin-binding protein 2 isoform X1 [Canis lupus familiaris] (gi|545533085)	STXBP2	gi|545533085		68 kDa	TRUE	2	3	1	4	10
Cluster of PREDICTED: protein FAM3D isoform X6 [Canis lupus familiaris] (gi|545533257)	FAM3D	gi|545533257	[2]	25 kDa	TRUE	1	2	2	5	10
Cluster of gi|545545919|ref|XP_005637046.1| PREDICTED: dynamin 1-like isoform X10 [Canis lupus familiaris] (gi|545545919|ref|XP_005637046.1| PREDICTED: dynamin 1-like isoform X10 [Canis lupus familiaris]-DECOY)	DNM1L	gi|545545919	|ref|XP_005637046.1| PREDICTED: dynamin 1-like isoform X10 [Canis lupus familiaris]-DECOY [3]	?	TRUE	2	4	3	1	10
PREDICTED: phospholipase B domain containing 1 [Canis lupus familiaris]	PLBD1	gi|545546258		64 kDa	TRUE	0	1	6	3	10
Cluster of PREDICTED: ubiquitin carboxyl-terminal hydrolase 5 isoform 1 [Canis lupus familiaris] (gi|545546547)	USP5	gi|545546547		99 kDa	TRUE	2	2	1	5	10
PREDICTED: kunitz-type protease inhibitor 1 [Canis lupus familiaris]	SPINT1	gi|545549455		56 kDa		1	5	1	3	10
Cluster of PREDICTED: sorting nexin-1 isoform X5 [Canis lupus familiaris] (gi|545550148)	SNX1	gi|545550148	[2]	54 kDa	TRUE	5	1	2	2	10
PREDICTED: coatomer subunit alpha [Canis lupus familiaris]	COPA	gi|545556932		138 kDa		1	2	2	5	10
Cluster of PREDICTED: angiotensin-converting enzyme 2 isoform X1 [Canis lupus familiaris] (gi|545557159)	ACE2	gi|545557159	[2]	93 kDa	TRUE	5	1	2	2	10
Cluster of GTPase NRas [Canis lupus familiaris] (gi|559146620)	NRAS	gi|559146620	[5]	21 kDa	TRUE	3	1	3	3	10
major vault protein [Canis lupus familiaris]	MVP	gi|560879431		99 kDa		4	4	1	1	10
PREDICTED: UV excision repair protein RAD23 homolog B isoform 2 [Canis lupus familiaris]	RAD23B	gi|57094213		43 kDa	TRUE	6	0	0	4	10
PREDICTED: serine-threonine kinase receptor-associated protein isoform 1 [Canis lupus familiaris]	STRAP	gi|57106953		39 kDa		0	3	4	3	10
PREDICTED: serpin B4 isoform 1 [Canis lupus familiaris]	SERPINB3	gi|73945427		45 kDa	TRUE	1	4	3	2	10
PREDICTED: protein-L-isoaspartate(D-aspartate) O-methyltransferase isoform 8 [Canis lupus familiaris]	PCMT1	gi|73945680		30 kDa		0	4	3	3	10
PREDICTED: protein-arginine deiminase type-2 [Canis lupus familiaris]	PADI2	gi|73950715		81 kDa	TRUE	2	3	3	2	10
PREDICTED: ephrin type-A receptor 2 isoform 1 [Canis lupus familiaris]	EPHA2	gi|73950854		108 kDa	TRUE	2	2	3	3	10
Cluster of PREDICTED: annexin A8 isoformX1 [Canis lupus familiaris] (gi|73953207)	ANXA8L1	gi|73953207	[2]	37 kDa	TRUE	2	3	2	3	10
PREDICTED: complement component C7 isoform 1 [Canis lupus familiaris]	C7	gi|73953824		95 kDa		2	1	4	3	10
PREDICTED: 26S protease regulatory subunit 10B [Canis lupus familiaris]	PSMC6	gi|73963837		46 kDa		3	0	4	3	10
PREDICTED: alpha-1-antichymotrypsin isoform X2 [Canis lupus familiaris]	SERPINA3	gi|73964432		47 kDa		4	1	2	3	10
PREDICTED: tetraspanin-8 [Canis lupus familiaris]	TSPAN8	gi|73968750		26 kDa		5	2	3	0	10
PREDICTED: glycerol-3-phosphate dehydrogenase 1-like [Canis lupus familiaris]	GPD1L	gi|73990384		38 kDa		2	1	2	5	10
PREDICTED: V-type proton ATPase subunit B, brain isoform isoform 1 [Canis lupus familiaris]	ATP6V1B2	gi|73993818		57 kDa	TRUE	2	1	3	4	10
antileukoproteinase precursor [Canis lupus familiaris]	SLPI	gi|163915355		14 kDa		4	2	2	1	9
glutathione peroxidase 2 [Canis lupus familiaris]	GPX2	gi|169636441		22 kDa	TRUE	3	1	2	3	9
thioredoxin reductase 1, cytoplasmic [Canis lupus familiaris]	TXNRD1	gi|169881283		72 kDa	TRUE	2	2	4	1	9
Cluster of carbonic anhydrase 2 [Canis lupus familiaris] (gi|223556019)	CA2	gi|223556019	[3]	29 kDa	TRUE	6	1	1	1	9
dipeptidyl peptidase 1 precursor [Canis lupus familiaris]	CTSC	gi|307938279		52 kDa	TRUE	4	1	3	1	9
Cluster of ubiquitin-conjugating enzyme E2 variant 1 [Canis lupus familiaris] (gi|326633230)	UBE2V1	gi|326633230	[2]	16 kDa	TRUE	6	1	1	1	9
Cluster of PREDICTED: echinoderm microtubule associated protein like 2 isoform X4 [Canis lupus familiaris] (gi|345784911)	EML2	gi|345784911	[2]	92 kDa	TRUE	1	2	4	2	9
Cluster of PREDICTED: glucosidase 2 subunit beta isoform X2 [Canis lupus familiaris] (gi|345786421)	PRKCSH	gi|345786421	[2]	60 kDa	TRUE	2	1	4	2	9
PREDICTED: acetoacetyl-CoA synthetase [Canis lupus familiaris]	AACS	gi|345791123		73 kDa		0	1	4	4	9
PREDICTED: sialate O-acetylesterase isoformX2 [Canis lupus familiaris]	SIAE	gi|345799695		57 kDa		1	2	4	2	9
PREDICTED: lymphocyte antigen 6D [Canis lupus familiaris]	LY6D	gi|345806460		13 kDa		1	1	6	1	9
chloride intracellular channel protein 1 [Canis lupus familiaris]	CLIC1	gi|356460954		27 kDa	TRUE	1	2	2	4	9
PREDICTED: aldehyde dehydrogenase family 1 member A3 isoform 1 [Canis lupus familiaris]	ALDH1A3	gi|359319175		56 kDa	TRUE	4	0	2	3	9
PREDICTED: ubiquitin-like protein ISG15 [Canis lupus familiaris]	ISG15	gi|359319512		19 kDa		2	2	3	2	9
Cluster of PREDICTED: ubiquitin-conjugating enzyme E2-24 kDa-like [Canis lupus familiaris] (gi|359321324)	UBE2N	gi|359321324	[2]	35 kDa	TRUE	3	2	2	2	9
PREDICTED: N-acetyl-D-glucosamine kinase [Canis lupus familiaris]	NAGK	gi|359321659		37 kDa	TRUE	2	2	2	3	9
PREDICTED: acyl-CoA synthetase short-chain family member 1 [Canis lupus familiaris]	ACSS1	gi|359322579		74 kDa		2	1	5	1	9
PREDICTED: T-complex protein 1 subunit eta-like [Canis lupus familiaris]	LOC100856782	gi|359324375		59 kDa		1	2	3	3	9
WAP four-disulfide core domain protein 2 precursor [Canis lupus familiaris]	WFDC2	gi|50979030		13 kDa		0	4	4	1	9
PREDICTED: alpha-1B-glycoprotein [Canis lupus familiaris]	A1BG	gi|545487024		61 kDa		3	1	3	2	9
PREDICTED: immunity-related GTPase family Q protein isoform X1 [Canis lupus familiaris]	IRGQ	gi|545488279		65 kDa		3	2	2	2	9
PREDICTED: calmodulin-like protein 3, partial [Canis lupus familiaris]	CALML3	gi|545490169		15 kDa	TRUE	3	1	3	2	9
PREDICTED: adenylate kinase 2, mitochondrial isoform X3 [Canis lupus familiaris]	AK2	gi|545491329	(+1)	27 kDa		2	2	2	3	9
PREDICTED: beta-hexosaminidase subunit beta [Canis lupus familiaris]	HEXB	gi|545492175		64 kDa		2	3	2	2	9
Cluster of PREDICTED: acetyl-CoA acetyltransferase, mitochondrial isoform X1 [Canis lupus familiaris] (gi|545497541)	ACAT1	gi|545497541	[2]	46 kDa	TRUE	0	1	5	3	9
Cluster of gi|545510629|ref|XP_005624537.1| PREDICTED: ATP-citrate synthase isoform X3 [Canis lupus familiaris] (gi|545510629|ref|XP_005624537.1| PREDICTED: ATP-citrate synthase isoform X3 [Canis lupus familiaris]-DECOY)	ACLY	gi|545510629	|ref|XP_005624537.1| PREDICTED: ATP-citrate synthase isoform X3 [Canis lupus familiaris]-DECOY [2]	?	TRUE	0	1	6	2	9
PREDICTED: secernin-2 isoform X1 [Canis lupus familiaris]	SCRN2	gi|545511045		47 kDa		1	3	3	2	9
PREDICTED: dipeptidyl peptidase 2 isoform 1 [Canis lupus familiaris]	DPP7	gi|545512527		60 kDa		0	2	5	2	9
Cluster of PREDICTED: protein kinase C and casein kinase substrate in neurons protein 2 isoform X6 [Canis lupus familiaris] (gi|545514564)	PACSIN2	gi|545514564	[2]	56 kDa	TRUE	6	0	2	1	9
PREDICTED: aspartic peptidase, retroviral-like 1 [Canis lupus familiaris]	ASPRV1	gi|545516037		38 kDa		2	2	3	2	9
PREDICTED: maltase-glucoamylase, intestinal [Canis lupus familiaris]	MGAM	gi|545525368		207 kDa	TRUE	0	2	4	3	9
PREDICTED: ras-related protein Rab-7a isoform X1 [Canis lupus familiaris]	RAB7A	gi|545532320		24 kDa	TRUE	3	1	3	2	9
Cluster of PREDICTED: sulfatase-modifying factor 1 isoform X3 [Canis lupus familiaris] (gi|545532885)	SUMF1	gi|545532885	[3]	36 kDa	TRUE	0	5	1	3	9
PREDICTED: dystroglycan isoform X1 [Canis lupus familiaris]	DAG1	gi|545533107		97 kDa		0	2	1	6	9
PREDICTED: PDZ domain-containing protein GIPC1 isoform X2 [Canis lupus familiaris]	GIPC1	gi|545534420		36 kDa	TRUE	0	1	5	3	9
PREDICTED: mucin-16 [Canis lupus familiaris]	MUC16	gi|545535651		680 kDa		0	1	4	4	9
Cluster of PREDICTED: uncharacterized protein LOC404305 [Canis lupus familiaris] (gi|545541550)	PSMA7	gi|545541550	[3]	49 kDa	TRUE	1	2	3	3	9
Cluster of PREDICTED: bifunctional epoxide hydrolase 2 isoform X5 [Canis lupus familiaris] (gi|545542385)	EPHX2	gi|545542385	[2]	62 kDa	TRUE	2	2	4	1	9
Cluster of PREDICTED: serine/threonine-protein phosphatase 2A 55 kDa regulatory subunit B delta isoform [Canis lupus familiaris] (gi|545548421)	PPP2R2D	gi|545548421	[5]	49 kDa	TRUE	1	4	2	2	9
PREDICTED: ubiquitin-conjugating enzyme E2 variant 2 isoform X2 [Canis lupus familiaris]	UBE2V2	gi|545548556		12 kDa	TRUE	0	4	2	3	9
PREDICTED: inorganic pyrophosphatase 2, mitochondrial [Canis lupus familiaris]	PPA2	gi|545552151		39 kDa		3	2	3	1	9
PREDICTED: three prime repair exonuclease 2 isoform X1 [Canis lupus familiaris]	TREX2	gi|545559796		32 kDa		5	0	2	2	9
beta-2-glycoprotein 1 precursor [Canis lupus familiaris]	APOH	gi|54792721		38 kDa		1	0	5	3	9
PREDICTED: flavin reductase (NADPH) isoform X2 [Canis lupus familiaris]	BLVRB	gi|73948324		22 kDa		1	2	4	2	9
PREDICTED: alanine--tRNA ligase, cytoplasmic isoformX1 [Canis lupus familiaris]	AARS	gi|73957022		107 kDa		0	2	4	3	9
PREDICTED: protein S100-A14 isoform X2 [Canis lupus familiaris]	S100A14	gi|73961670		12 kDa		2	1	3	3	9
PREDICTED: citrate synthase, mitochondrial isoform 2 [Canis lupus familiaris]	CS	gi|73968367		52 kDa		1	2	3	3	9
PREDICTED: ras-related protein Rab-14 isoform 1 [Canis lupus familiaris]	RAB14	gi|73971644		24 kDa		2	1	2	4	9
PREDICTED: 26S proteasome non-ATPase regulatory subunit 13 isoform 2 [Canis lupus familiaris]	PSMD13	gi|73982052		43 kDa		4	2	1	2	9
Cluster of PREDICTED: cysteine--tRNA ligase, cytoplasmic isoformX2 [Canis lupus familiaris] (gi|73982653)	CARS	gi|73982653		95 kDa	TRUE	0	2	4	3	9
PREDICTED: coronin-1B isoformX1 [Canis lupus familiaris]	CORO1B	gi|73982819		54 kDa	TRUE	2	3	3	1	9
PREDICTED: hsp90 co-chaperone Cdc37 isoform 2 [Canis lupus familiaris]	CDC37	gi|73986801		45 kDa		1	3	3	2	9
PREDICTED: twinfilin-1 isoformX1 [Canis lupus familiaris]	TWF1	gi|73996743		40 kDa	TRUE	5	2	1	1	9
PREDICTED: EH domain-containing protein 4 [Canis lupus familiaris]	EHD4	gi|74000237		61 kDa	TRUE	1	2	2	4	9
Cluster of mitogen-activated protein kinase 1 [Canis lupus familiaris] (gi|160837810)	MAPK1	gi|160837810	[3]	41 kDa	TRUE	0	2	3	3	8
cation-independent mannose-6-phosphate receptor precursor [Canis lupus familiaris]	CI-MPR/IGF2R	gi|169790794		275 kDa		0	0	4	4	8
erythrocyte band 7 integral membrane protein [Canis lupus familiaris]	STOM	gi|217416483		31 kDa	TRUE	2	0	4	2	8
PREDICTED: submaxillary gland androgen regulated protein 3A isoformX3 [Canis lupus familiaris]	LOC608868	gi|345779658		30 kDa	TRUE	4	0	2	2	8
Cluster of PREDICTED: 26S protease regulatory subunit 6A isoform 1 [Canis lupus familiaris] (gi|345783922)	PSMC3	gi|345783922	[2]	47 kDa	TRUE	0	2	2	4	8
Cluster of PREDICTED: filamin-B isoformX2 [Canis lupus familiaris] (gi|345787595)	FLNB	gi|345787595	[2]	276 kDa	TRUE	2	3	2	1	8
Cluster of PREDICTED: keratin, type II cytoskeletal 5 isoform X1 [Canis lupus familiaris] (gi|345791904)	KRT5	gi|345791904	[3]	63 kDa	TRUE	1	2	3	2	8
PREDICTED: LOW QUALITY PROTEIN: insulin-degrading enzyme [Canis lupus familiaris]	IDE	gi|345792504		119 kDa		0	0	2	6	8
PREDICTED: SH3 domain binding glutamic acid-rich protein like 3 [Canis lupus familiaris]	SH3BGRL3	gi|345794456		10 kDa		5	0	2	1	8
PREDICTED: LOW QUALITY PROTEIN: Obg-like ATPase 1 isoform 2 [Canis lupus familiaris]	OLA1	gi|345797138		45 kDa		2	0	4	2	8
PREDICTED: long-chain specific acyl-CoA dehydrogenase, mitochondrial [Canis lupus familiaris]	ACADL	gi|345797487		49 kDa		3	1	3	1	8
PREDICTED: actin-related protein 2/3 complex subunit 1A [Canis lupus familiaris]	ARPC1A	gi|345801291		42 kDa	TRUE	3	0	4	1	8
PREDICTED: bleomycin hydrolase [Canis lupus familiaris]	BLMH	gi|345804988		52 kDa		3	1	2	2	8
PREDICTED: dual specificity protein phosphatase 3 [Canis lupus familiaris]	DUSP3	gi|345805116		26 kDa		2	1	2	3	8
proteasome subunit beta type-3 [Canis lupus familiaris]	PSMB3	gi|356461018		23 kDa	TRUE	1	2	2	3	8
PREDICTED: LOW QUALITY PROTEIN: fermitin family homolog 3 [Canis lupus familiaris]	FERMT3	gi|359321810		75 kDa	TRUE	2	2	3	1	8
PREDICTED: carbohydrate kinase domain containing [Canis lupus familiaris]	CARKD	gi|359322540		32 kDa		3	0	3	2	8
superoxide dismutase [Cu-Zn] [Canis lupus familiaris]	SOD1	gi|50978674		16 kDa	TRUE	1	1	4	2	8
Cluster of pantetheinase precursor [Canis lupus familiaris] (gi|50979244)	VNN1	gi|50979244	[2]	57 kDa	TRUE	2	2	3	1	8
Cluster of PREDICTED: carcinoembryonic antigen-related cell adhesion molecule 1 isoform X1 [Canis lupus familiaris] (gi|545486336)	CEACAM1	gi|545486336	[5]	57 kDa	TRUE	0	2	4	2	8
PREDICTED: protein unc-45 homolog A isoform X4 [Canis lupus familiaris]	UNC45A	gi|545493497		118 kDa		4	2	1	1	8
Cluster of PREDICTED: prominin-1 isoform X4 [Canis lupus familiaris] (gi|545493995)	PROM1	gi|545493995	[2]	96 kDa	TRUE	0	2	2	4	8
PREDICTED: annexin A6 isoform X3 [Canis lupus familiaris]	ANXA6	gi|545496027		76 kDa	TRUE	1	1	3	3	8
Cluster of PREDICTED: protein flightless-1 homolog isoform X1 [Canis lupus familiaris] (gi|545498416)	FLII	gi|545498416	[2]	145 kDa	TRUE	2	1	3	2	8
PREDICTED: heat shock protein 75 kDa, mitochondrial [Canis lupus familiaris]	TRAP1	gi|545502393		80 kDa		0	2	4	2	8
PREDICTED: phosphoglycolate phosphatase [Canis lupus familiaris]	PGP	gi|545503705		27 kDa		2	2	2	2	8
PREDICTED: ladinin-1 [Canis lupus familiaris]	LAD1	gi|545503983		53 kDa		2	0	2	4	8
Cluster of PREDICTED: tropomyosin alpha-3 chain isoform X15 [Canis lupus familiaris] (gi|545504099)	TPM3	gi|545504099	[5]	21 kDa	TRUE	4	0	1	3	8
Cluster of PREDICTED: farnesyl pyrophosphate synthase isoform X1 [Canis lupus familiaris] (gi|545505437)	FDPS	gi|545505437	[2]	48 kDa	TRUE	3	0	2	3	8
PREDICTED: protein S100-A16 isoform X5 [Canis lupus familiaris]	S100A16	gi|545505703		12 kDa		1	2	2	3	8
PREDICTED: 3-ketoacyl-CoA thiolase, mitochondrial [Canis lupus familiaris]	ACAA2	gi|545506598		28 kDa		1	2	2	3	8
Cluster of PREDICTED: allograft inflammatory factor 1-like isoform X1 [Canis lupus familiaris] (gi|545512949)	AIF1L	gi|545512949	[2]	17 kDa	TRUE	1	2	2	3	8
PREDICTED: ran GTPase-activating protein 1 isoform X1 [Canis lupus familiaris]	RANGAP1	gi|545514696		68 kDa		2	1	2	3	8
Cluster of PREDICTED: phospholipase A-2-activating protein isoform X3 [Canis lupus familiaris] (gi|545517261)	PLAA	gi|545517261	[2]	81 kDa	TRUE	2	1	3	2	8
PREDICTED: uncharacterized protein LOC474849, partial [Canis lupus familiaris]	LOC474849	gi|545520258		25 kDa		3	2	2	1	8
PREDICTED: CAD protein isoform X4 [Canis lupus familiaris]	CAD	gi|545527327		212 kDa		1	1	3	3	8
Cluster of PREDICTED: biliverdin reductase A isoform X3 [Canis lupus familiaris] (gi|545529239)	BLVRA	gi|545529239		34 kDa	TRUE	5	1	0	2	8
Cluster of PREDICTED: 182 kDa tankyrase-1-binding protein isoform X1 [Canis lupus familiaris] (gi|545530043)	TNKS1BP1	gi|545530043	[2]	181 kDa	TRUE	0	2	3	3	8
PREDICTED: heat shock 70 kDa protein 4L isoform X2 [Canis lupus familiaris]	HSPA4L	gi|545531754		108 kDa	TRUE	0	1	5	2	8
PREDICTED: LOW QUALITY PROTEIN: mesencephalic astrocyte-derived neurotrophic factor [Canis lupus familiaris]	MANF	gi|545533575		25 kDa	TRUE	2	2	2	2	8
PREDICTED: leucine-rich alpha-2-glycoprotein [Canis lupus familiaris]	LRG1	gi|545535128		39 kDa		0	2	3	3	8
PREDICTED: coatomer subunit beta' [Canis lupus familiaris]	COPB2	gi|545539148		102 kDa		0	2	4	2	8
PREDICTED: cullin-3 isoformX1 [Canis lupus familiaris]	CUL3	gi|545542593		89 kDa		0	2	3	3	8
Cluster of PREDICTED: N-acetylgalactosaminyltransferase 7-like [Canis lupus familiaris] (gi|545547237)	GALNT7	gi|545547237	[2]	76 kDa	TRUE	2	2	0	4	8
Cluster of PREDICTED: caspase-7 isoform X1 [Canis lupus familiaris] (gi|545547982)	CASP7	gi|545547982	[2]	34 kDa	TRUE	2	2	3	1	8
Cluster of PREDICTED: V-type proton ATPase subunit H isoform X2 [Canis lupus familiaris] (gi|545548610)	ATP6V1H	gi|545548610	[2]	54 kDa	TRUE	3	1	3	1	8
PREDICTED: transcription elongation factor B polypeptide 1 isoform X1 [Canis lupus familiaris]	TCEB1	gi|545548863		12 kDa		0	2	4	2	8
Cluster of PREDICTED: adiponectin isoform X2 [Canis lupus familiaris] (gi|545553491)	ADIPOQ	gi|545553491		26 kDa	TRUE	1	1	4	2	8
Cluster of PREDICTED: histidine-rich glycoprotein isoform X1 [Canis lupus familiaris] (gi|545553762)	HRG	gi|545553762	[2]	62 kDa	TRUE	5	0	2	1	8
Cluster of PREDICTED: eukaryotic translation initiation factor 5A-2 [Canis lupus familiaris] (gi|545554058)	EIF5A2	gi|545554058	[4]	17 kDa	TRUE	0	3	2	3	8
Cluster of PREDICTED: UDP-N-acetylhexosamine pyrophosphorylase isoform X7 [Canis lupus familiaris] (gi|545556819)	UAP1	gi|545556819	[3]	59 kDa	TRUE	0	4	2	2	8
PREDICTED: actin-related protein 2/3 complex subunit 1B isoform 1 [Canis lupus familiaris]	ARPC1B	gi|57087613		41 kDa	TRUE	4	0	3	1	8
PREDICTED: rho GDP-dissociation inhibitor 2 [Canis lupus familiaris]	ARHGDIB	gi|57106959		23 kDa		1	2	1	4	8
Cluster of MHC class I DLA-88 precursor [Canis lupus familiaris] (gi|62339252)	O46882	gi|62339252	[5]	40 kDa	TRUE	2	1	3	2	8
Cluster of PREDICTED: proteasome subunit alpha type-3 isoform 8 [Canis lupus familiaris] (gi|73963046)	PSMA3	gi|73963046	[2]	28 kDa	TRUE	0	1	3	4	8
Cluster of PREDICTED: peroxisomal multifunctional enzyme type 2 isoformX2 [Canis lupus familiaris] (gi|73970527)	HSD17B4	gi|73970527		80 kDa	TRUE	3	1	2	2	8
Cluster of PREDICTED: calumenin isoformX2 [Canis lupus familiaris] (gi|73975637)	CALU	gi|73975637	[2]	37 kDa	TRUE	2	1	1	4	8
PREDICTED: 60S acidic ribosomal protein P2 [Canis lupus familiaris]	RPLP2	gi|73983454		12 kDa	TRUE	1	2	2	3	8
PREDICTED: DNA damage-binding protein 1 [Canis lupus familiaris]	DDB1	gi|73983859		127 kDa		1	2	1	4	8
PREDICTED: aminoacylase-1 isoform 3 [Canis lupus familiaris]	ACY1	gi|73985532		45 kDa		1	1	3	3	8
Cluster of PREDICTED: resistin isoform X2 [Canis lupus familiaris] (gi|73987160)	RETN	gi|73987160		11 kDa	TRUE	1	2	3	2	8
PREDICTED: rho-related GTP-binding protein RhoG [Canis lupus familiaris]	RHOG	gi|73988219		28 kDa	TRUE	4	1	2	1	8
PREDICTED: hemopexin [Canis lupus familiaris]	HPX	gi|73988725		51 kDa	TRUE	6	0	0	2	8
PREDICTED: 26S proteasome non-ATPase regulatory subunit 9 isoformX1 [Canis lupus familiaris]	PSMD9	gi|73994527		25 kDa		3	1	2	2	8
PREDICTED: beta-hexosaminidase subunit alpha [Canis lupus familiaris]	HEXA	gi|74000959		61 kDa		2	4	0	2	8
PREDICTED: GMP reductase 1 isoform 1 [Canis lupus familiaris]	GMPR	gi|74003928		37 kDa	TRUE	5	0	2	1	8
Cluster of major prion protein precursor [Canis lupus familiaris] (gi|165973348)	PrP	gi|165973348	[2]	28 kDa	TRUE	2	2	1	2	7
PREDICTED: LOW QUALITY PROTEIN: isochorismatase domain-containing protein 1 [Canis lupus familiaris]	ISOC1	gi|345777749		33 kDa	TRUE	1	1	2	3	7
PREDICTED: ATP-binding cassette sub-family E member 1 isoform 4 [Canis lupus familiaris]	ABCE1	gi|345781155		67 kDa		2	0	3	2	7
Cluster of PREDICTED: spectrin beta chain, non-erythrocytic 2 isoformX1 [Canis lupus familiaris] (gi|345783052)	SPTBN2	gi|345783052	[2]	274 kDa	TRUE	7	0	0	0	7
Cluster of PREDICTED: isoaspartyl peptidase/L-asparaginase isoform X3 [Canis lupus familiaris] (gi|345783269)	ASRGL1	gi|345783269	[2]	33 kDa	TRUE	4	0	0	3	7
PREDICTED: alpha/beta hydrolase domain-containing protein 14B [Canis lupus familiaris]	ABHD14B	gi|345786899		22 kDa		0	2	3	2	7
PREDICTED: cAMP-dependent protein kinase type II-alpha regulatory subunit isoform 1 [Canis lupus familiaris]	PRKAR2A	gi|345787467		45 kDa	TRUE	2	2	1	2	7
PREDICTED: protein FAM3B [Canis lupus familiaris]	FAM3B	gi|345795447		26 kDa		0	3	1	3	7
PREDICTED: LOW QUALITY PROTEIN: desmoplakin [Canis lupus familiaris]	DSP	gi|345796694		332 kDa		1	1	2	3	7
PREDICTED: fascin isoform 1 [Canis lupus familiaris]	FSCN1	gi|345801349		55 kDa		2	1	2	2	7
PREDICTED: protein S100-A12 [Canis lupus familiaris]	S100A12	gi|345802699		11 kDa		3	3	0	1	7
Cluster of PREDICTED: actin-related protein 2/3 complex subunit 5 isoform X2 [Canis lupus familiaris] (gi|345803175)	Arpc5	gi|345803175	[2]	16 kDa	TRUE	2	3	1	1	7
Cluster of microtubule-associated protein RP/EB family member 1 [Canis lupus familiaris] (gi|354623047)	MAPRE1	gi|354623047	[2]	30 kDa	TRUE	0	3	2	2	7
PREDICTED: valine--tRNA ligase isoformX1 [Canis lupus familiaris]	VARS	gi|359320880	(+1)	140 kDa		2	1	2	2	7
PREDICTED: ribose-5-phosphate isomerase-like isoform X1 [Canis lupus familiaris]	RPIA	gi|359321649		33 kDa		2	0	1	4	7
PREDICTED: complement factor D isoform X2 [Canis lupus familiaris]	CFD	gi|359322165	(+1)	28 kDa		0	1	3	3	7
Cluster of mitogen-activated protein kinase 14 [Canis lupus familiaris] (gi|50978968)	MAPK14	gi|50978968	[3]	41 kDa	TRUE	0	1	3	3	7
tissue alpha-L-fucosidase precursor [Canis lupus familiaris]	FUCA1	gi|50979046		54 kDa		0	1	4	2	7
PREDICTED: leucine--tRNA ligase, cytoplasmic isoform X2 [Canis lupus familiaris]	LARS	gi|545490541	(+1)	134 kDa		2	0	2	3	7
Cluster of PREDICTED: calpastatin isoform X4 [Canis lupus familiaris] (gi|545492640)	CAST	gi|545492640	[3]	99 kDa	TRUE	1	0	3	3	7
PREDICTED: extracellular superoxide dismutase [Cu-Zn] [Canis lupus familiaris]	SOD3	gi|545494282		33 kDa		5	0	0	2	7
PREDICTED: multimerin-2 isoform X1 [Canis lupus familiaris]	MMRN2	gi|545495528		95 kDa		1	1	3	2	7
PREDICTED: protein FAM25C-like [Canis lupus familiaris]	LOC102153325	gi|545495531		9 kDa		2	2	0	3	7
PREDICTED: LOW QUALITY PROTEIN: inorganic pyrophosphatase [Canis lupus familiaris]	PPA1	gi|545496523		33 kDa		1	2	3	1	7
PREDICTED: vitelline membrane outer layer protein 1 homolog isoform X2 [Canis lupus familiaris]	VMO1	gi|545497825		23 kDa		4	0	0	3	7
Cluster of PREDICTED: T-complex protein 1 subunit zeta [Canis lupus familiaris] (gi|545500762)	CCT6A	gi|545500762	[4]	58 kDa	TRUE	2	1	2	2	7
PREDICTED: apolipoprotein B receptor [Canis lupus familiaris]	APOBR	gi|545501703		137 kDa		2	2	3	0	7
PREDICTED: serine protease 27 [Canis lupus familiaris]	PRSS27	gi|545502547		38 kDa	TRUE	1	2	0	4	7
PREDICTED: enoyl-CoA delta isomerase 1, mitochondrial [Canis lupus familiaris]	ECI1	gi|545503700		44 kDa		3	1	1	2	7
Cluster of PREDICTED: complement decay-accelerating factor isoform X2 [Canis lupus familiaris] (gi|545504254)	CD55	gi|545504254	[2]	67 kDa	TRUE	0	0	2	5	7
PREDICTED: sulfhydryl oxidase 1 [Canis lupus familiaris]	QSOX1	gi|545504470		54 kDa	TRUE	1	1	2	3	7
PREDICTED: plasma serine protease inhibitor isoform X2 [Canis lupus familiaris]	SERPINA5	gi|545508405		46 kDa		1	1	2	3	7
PREDICTED: granulins [Canis lupus familiaris]	GRN	gi|545510346		46 kDa		0	2	3	2	7
PREDICTED: protein SET isoform X1 [Canis lupus familiaris]	SET	gi|545513094		35 kDa	TRUE	1	2	1	3	7
PREDICTED: dynactin subunit 2 isoform X4 [Canis lupus familiaris]	DCTN2	gi|545513862	(+1)	45 kDa		0	1	3	3	7
PREDICTED: exportin-T isoform X2 [Canis lupus familiaris]	XPOT	gi|545513973		110 kDa		0	2	3	2	7
PREDICTED: exportin-1 isoform X2 [Canis lupus familiaris]	XPO1	gi|545515701		123 kDa		2	2	1	2	7
PREDICTED: epithelial cell adhesion molecule [Canis lupus familiaris]	EPCAM	gi|545516000		60 kDa		0	1	3	3	7
Cluster of PREDICTED: clathrin coat assembly protein AP180 isoform X2 [Canis lupus familiaris] (gi|545518191)	SNAP91	gi|545518191	[5]	92 kDa	TRUE	1	2	2	2	7
Cluster of PREDICTED: ectonucleotide pyrophosphatase/phosphodiesterase family member 2 isoform X8 [Canis lupus familiaris] (gi|545520671)	ENPP2	gi|545520671	[2]	109 kDa	TRUE	4	2	1	0	7
PREDICTED: protein FAM49B isoform X2 [Canis lupus familiaris]	FAM49B	gi|545520839	(+1)	37 kDa	TRUE	2	2	0	3	7
PREDICTED: LOW QUALITY PROTEIN: 5-oxoprolinase [Canis lupus familiaris]	OPLAH	gi|545521844		136 kDa		2	1	2	2	7
PREDICTED: V-type proton ATPase subunit F [Canis lupus familiaris]	ATP6V1F	gi|545522103		13 kDa		4	1	1	1	7
PREDICTED: septin-7 isoformX1 [Canis lupus familiaris]	SEPT7	gi|545522993		52 kDa	TRUE	2	1	1	3	7
PREDICTED: kynureninase isoform X1 [Canis lupus familiaris]	KYNU	gi|545532166		53 kDa		2	1	1	3	7
PREDICTED: tartrate-resistant acid phosphatase type 5 isoform X1 [Canis lupus familiaris]	ACP5	gi|545534595		38 kDa		0	3	1	3	7
PREDICTED: tetranectin [Canis lupus familiaris]	CLEC3B	gi|545535577		18 kDa		2	1	2	2	7
PREDICTED: S-formylglutathione hydrolase isoform X3 [Canis lupus familiaris]	ESD	gi|545537414		31 kDa		1	1	2	3	7
PREDICTED: translationally-controlled tumor protein [Canis lupus familiaris]	TPT1	gi|545537467		20 kDa		2	0	0	5	7
PREDICTED: EPM2A-interacting protein 1 [Canis lupus familiaris]	EPM2AIP1	gi|545538385		70 kDa	TRUE	1	0	2	4	7
Cluster of PREDICTED: glycogenin-1 isoform X1 [Canis lupus familiaris] (gi|545539293)	GYG1	gi|545539293	[2]	41 kDa	TRUE	4	0	2	1	7
PREDICTED: ribosomal protein, large, P0 isoform X1 [Canis lupus familiaris]	RPLP0	gi|545543306		34 kDa	TRUE	0	2	2	3	7
PREDICTED: endoplasmic reticulum resident protein 29 [Canis lupus familiaris]	ERP29	gi|545544611		41 kDa		0	2	2	3	7
PREDICTED: Ig lambda chain V-I region BL2 [Canis lupus familiaris]	LOC612180	gi|545544658		15 kDa	TRUE	1	0	3	3	7
PREDICTED: extracellular glycoprotein lacritin [Canis lupus familiaris]	LACRT	gi|545545185		12 kDa		0	2	4	1	7
Cluster of PREDICTED: xaa-Pro aminopeptidase 1 isoform X8 [Canis lupus familiaris] (gi|545547906)	XPNPEP1	gi|545547906	[2]	70 kDa	TRUE	1	2	1	3	7
PREDICTED: tyrosine-protein kinase CSK isoform X6 [Canis lupus familiaris]	CSK	gi|545550492		51 kDa		0	1	1	5	7
PREDICTED: integrin beta-2 isoform X2 [Canis lupus familiaris]	ITGB2	gi|545551444		85 kDa		2	0	4	1	7
PREDICTED: general vesicular transport factor p115 isoform X2 [Canis lupus familiaris]	USO1	gi|545551650	(+1)	109 kDa		2	1	3	1	7
Cluster of PREDICTED: PDZ and LIM domain protein 5 isoform X17 [Canis lupus familiaris] (gi|545552047)	PDLIM5	gi|545552047	[3]	64 kDa	TRUE	6	0	1	0	7
PREDICTED: omega-amidase NIT2 isoform X1 [Canis lupus familiaris]	NIT2	gi|545552597		31 kDa		2	2	1	2	7
PREDICTED: junctional adhesion molecule A [Canis lupus familiaris]	F11R	gi|545556898		31 kDa		1	1	2	3	7
Cluster of PREDICTED: N-alpha-acetyltransferase 10 isoform X3 [Canis lupus familiaris] (gi|545559842)	NAA10	gi|545559842	[6]	25 kDa	TRUE	2	2	1	2	7
cell division control protein 42 homolog precursor [Canis lupus familiaris]	CDC42	gi|55742784		21 kDa	TRUE	0	2	2	3	7
PREDICTED: ADP-ribosylation factor 6 [Canis lupus familiaris]	ARF6	gi|57090551		20 kDa	TRUE	3	0	2	2	7
Cluster of PREDICTED: 60S ribosomal protein L30 isoform 1 [Canis lupus familiaris] (gi|57113163)	RPL30	gi|57113163	[2]	13 kDa	TRUE	3	1	2	1	7
PREDICTED: protein-arginine deiminase type-1 isoform 1 [Canis lupus familiaris]	PADI1	gi|73950815		74 kDa	TRUE	1	1	1	4	7
PREDICTED: bolA-like protein 2 [Canis lupus familiaris]	LOC102734269	gi|73958548		10 kDa		3	1	2	1	7
Cluster of PREDICTED: pyridoxal-dependent decarboxylase domain-containing protein 1 isoformX1 [Canis lupus familiaris] (gi|73958861)	PDXDC1	gi|73958861	[2]	87 kDa	TRUE	0	2	2	3	7
PREDICTED: cellular retinoic acid-binding protein 2 [Canis lupus familiaris]	CRABP2	gi|73961545		16 kDa		2	1	1	3	7
PREDICTED: proteasome activator complex subunit 2 isoform 1 [Canis lupus familiaris]	PSME2	gi|73962540		27 kDa		2	1	2	2	7
PREDICTED: nuclear protein localization protein 4 homolog [Canis lupus familiaris]	NPLOC4	gi|73964791		69 kDa	TRUE	0	2	2	3	7
PREDICTED: inter-alpha-trypsin inhibitor heavy chain H1 isoform X2 [Canis lupus familiaris]	ITIH1	gi|73985485		101 kDa		0	2	3	2	7
Cluster of PREDICTED: tropomyosin alpha-4 chain isoformX2 [Canis lupus familiaris] (gi|73986126)	TPM4	gi|73986126	[2]	33 kDa	TRUE	0	2	2	3	7
Cluster of PREDICTED: protein phosphatase methylesterase 1 isoformX4 [Canis lupus familiaris] (gi|73987978)	PPME1	gi|73987978		42 kDa	TRUE	1	1	2	3	7
Cluster of PREDICTED: retinol-binding protein 4 [Canis lupus familiaris] (gi|73998292)	RBP4	gi|73998292		30 kDa	TRUE	2	1	1	3	7
PREDICTED: pseudouridine-5'-monophosphatase [Canis lupus familiaris]	PUDP	gi|74007089		26 kDa		2	1	3	1	7
Cluster of carbonic anhydrase 1 [Canis lupus familiaris] (gi|223556021)	CA1	gi|223556021		29 kDa	TRUE	3	1	1	1	6
plasma kallikrein [Canis lupus familiaris]	KLKB1	gi|337298514		71 kDa	TRUE	1	1	2	2	6
PREDICTED: LOW QUALITY PROTEIN: beta-1,4-galactosyltransferase 1 [Canis lupus familiaris]	B4GALT1	gi|345777515		44 kDa		2	2	1	1	6
PREDICTED: lactoylglutathione lyase [Canis lupus familiaris]	GLO1	gi|345778725		21 kDa		1	1	2	2	6
PREDICTED: oxysterol-binding protein-related protein 3 isoformX9 [Canis lupus familiaris]	OSBPL3	gi|345780263		101 kDa	TRUE	0	1	1	4	6
Cluster of PREDICTED: proteasome subunit beta type-2 isoform 3 [Canis lupus familiaris] (gi|345780637)	PSMB2	gi|345780637	[2]	23 kDa	TRUE	4	0	1	1	6
PREDICTED: 26S protease regulatory subunit 7 [Canis lupus familiaris]	PSMC2	gi|345782896		49 kDa	TRUE	2	1	1	2	6
PREDICTED: superoxide dismutase [Mn], mitochondrial isoform 1 [Canis lupus familiaris]	SOD2	gi|345784714		25 kDa		0	1	3	2	6
PREDICTED: 6-phosphogluconolactonase [Canis lupus familiaris]	PGLS	gi|345787617		28 kDa		1	2	3	0	6
Cluster of PREDICTED: mitochondrial peptide methionine sulfoxide reductase isoform 3 [Canis lupus familiaris] (gi|345790503)	LOC608103	gi|345790503		26 kDa	TRUE	1	1	3	1	6
Cluster of PREDICTED: phosphatidylethanolamine-binding protein 4 isoformX1 [Canis lupus familiaris] (gi|345790559)	PEBP4	gi|345790559	[2]	26 kDa	TRUE	1	1	3	1	6
PREDICTED: heparin cofactor 2 [Canis lupus familiaris]	SERPIND1	gi|345791439		57 kDa	TRUE	1	1	1	3	6
PREDICTED: eukaryotic initiation factor 4A-II isoform 7 [Canis lupus familiaris]	EIF4A2	gi|345796421		46 kDa	TRUE	2	0	1	3	6
Cluster of PREDICTED: inositol polyphosphate 1-phosphatase isoform X2 [Canis lupus familiaris] (gi|345797417)	INPP1	gi|345797417	[2]	43 kDa	TRUE	1	0	3	2	6
Cluster of PREDICTED: ubiquitin-conjugating enzyme E2 K isoform X3 [Canis lupus familiaris] (gi|345798448)	UBE2K	gi|345798448	[2]	22 kDa	TRUE	3	1	2	0	6
PREDICTED: alpha-mannosidase 2 [Canis lupus familiaris]	MAN2A1	gi|345798712		153 kDa	TRUE	0	1	1	4	6
PREDICTED: apolipoprotein A-IV [Canis lupus familiaris]	APOA4	gi|345799905		44 kDa	TRUE	1	2	1	2	6
PREDICTED: 45 kDa calcium-binding protein isoformX1 [Canis lupus familiaris]	SDF4	gi|345800610		41 kDa		0	2	1	3	6
PREDICTED: LOW QUALITY PROTEIN: laminin subunit gamma-1 isoform 1 [Canis lupus familiaris]	LAMC1	gi|345802893		176 kDa		2	0	3	1	6
Cluster of PREDICTED: NADPH-dependent diflavin oxidoreductase 1 isoformX1 [Canis lupus familiaris] (gi|345805933)	NDOR1	gi|345805933		58 kDa	TRUE	2	1	1	2	6
Cluster of PREDICTED: clathrin light chain A isoformX3 [Canis lupus familiaris] (gi|359320839)	CLTA	gi|359320839	[3]	27 kDa	TRUE	3	0	2	1	6
PREDICTED: glycine--tRNA ligase isoform X1 [Canis lupus familiaris]	GARS	gi|359321220		84 kDa		1	2	1	2	6
Cluster of PREDICTED: EH domain-containing protein 1 isoform X1 [Canis lupus familiaris] (gi|359321796)	EHD1	gi|359321796	[2]	62 kDa	TRUE	2	1	1	2	6
PREDICTED: eukaryotic translation initiation factor 3 subunit F [Canis lupus familiaris]	EIF3F	gi|359322420		37 kDa		2	0	2	2	6
trefoil factor 2 precursor [Canis lupus familiaris]	TFF2	gi|50950231		14 kDa		1	1	3	1	6
interleukin-1 receptor antagonist protein precursor [Canis lupus familiaris]	IL1RN	gi|50978786		20 kDa		2	2	1	1	6
alpha-centractin [Canis lupus familiaris]	ACTR1A	gi|50978894		43 kDa	TRUE	1	1	2	2	6
PREDICTED: LOW QUALITY PROTEIN: asparagine--tRNA ligase, cytoplasmic isoform 1 [Canis lupus familiaris]	NARS	gi|545485232		72 kDa	TRUE	1	1	1	3	6
PREDICTED: kallikrein-10 isoform X1 [Canis lupus familiaris]	KLK10	gi|545486310		30 kDa	TRUE	4	0	1	1	6
PREDICTED: serine/threonine-protein phosphatase 5 [Canis lupus familiaris]	PPP5C	gi|545489296		56 kDa		0	2	3	1	6
Cluster of PREDICTED: tyrosine--tRNA ligase, cytoplasmic isoformX1 [Canis lupus familiaris] (gi|545491353)	YARS	gi|545491353	[2]	63 kDa	TRUE	2	0	1	3	6
PREDICTED: annexin A7 isoform X3 [Canis lupus familiaris]	ANXA7	gi|545495250	(+1)	50 kDa	TRUE	2	1	2	1	6
PREDICTED: serine protease inhibitor Kazal-type 7 [Canis lupus familiaris]	SPINK7	gi|545496175		12 kDa		2	2	1	1	6
PREDICTED: LOW QUALITY PROTEIN: trehalase [Canis lupus familiaris]	TREH	gi|545497218		66 kDa	TRUE	0	1	2	3	6
PREDICTED: beta-catenin-interacting protein 1 isoform X1 [Canis lupus familiaris]	CTNNBIP1	gi|545499380		9 kDa		3	0	2	1	6
PREDICTED: core-binding factor subunit beta [Canis lupus familiaris]	CBFB	gi|545500429		20 kDa		0	2	3	1	6
Cluster of PREDICTED: prostasin isoform X1 [Canis lupus familiaris] (gi|545501392)	PRSS8	gi|545501392	[2]	35 kDa	TRUE	2	1	2	1	6
PREDICTED: periplakin isoform X2 [Canis lupus familiaris]	PPL	gi|545502307		204 kDa	TRUE	3	0	1	2	6
PREDICTED: C4b-binding protein alpha chain isoform X2 [Canis lupus familiaris]	C4BPA	gi|545504250		69 kDa		0	1	4	1	6
PREDICTED: protein-glutamine gamma-glutamyltransferase K isoform X1 [Canis lupus familiaris]	TGM1	gi|545506682		96 kDa		0	2	2	2	6
PREDICTED: galectin-3 isoform X2 [Canis lupus familiaris]	LGALS3	gi|545506706		26 kDa		3	0	2	1	6
PREDICTED: cAMP-dependent protein kinase type I-alpha regulatory subunit isoform X2 [Canis lupus familiaris]	PRKAR1A	gi|545510020		43 kDa	TRUE	2	1	2	1	6
Cluster of PREDICTED: GTP:AMP phosphotransferase AK3, mitochondrial-like [Canis lupus familiaris] (gi|545510093)	LOC100856042	gi|545510093	[3]	36 kDa	TRUE	1	1	2	2	6
Cluster of PREDICTED: proteasome activator complex subunit 3 isoform X8 [Canis lupus familiaris] (gi|545510476)	PSME3	gi|545510476	[2]	31 kDa	TRUE	1	1	1	3	6
PREDICTED: nucleoredoxin isoform X1 [Canis lupus familiaris]	NXN	gi|545512065	(+1)	47 kDa		2	0	1	3	6
PREDICTED: 14 kDa phosphohistidine phosphatase [Canis lupus familiaris]	PHPT1	gi|545512563		14 kDa		1	2	3	0	6
PREDICTED: protein canopy homolog 2 isoform X2 [Canis lupus familiaris]	CNPY2	gi|545513722		21 kDa		4	0	1	1	6
Cluster of PREDICTED: UTP--glucose-1-phosphate uridylyltransferase isoform X3 [Canis lupus familiaris] (gi|545515747)	UGP2	gi|545515747	[2]	57 kDa	TRUE	2	1	3	0	6
Cluster of PREDICTED: cyclin-dependent kinase 4 inhibitor B isoform X1 [Canis lupus familiaris] (gi|545516454)	cdkn2B	gi|545516454	[2]	15 kDa	TRUE	2	1	1	2	6
PREDICTED: proteasome-associated protein ECM29 homolog, partial [Canis lupus familiaris]	KIAA0368	gi|545518152		214 kDa		1	2	2	1	6
PREDICTED: mucin-21 [Canis lupus familiaris]	MUC21	gi|545520250		43 kDa		1	1	2	2	6
PREDICTED: LOW QUALITY PROTEIN: adseverin [Canis lupus familiaris]	SCIN	gi|545523234		77 kDa		2	1	2	1	6
Cluster of PREDICTED: single-stranded DNA-binding protein, mitochondrial isoform X1 [Canis lupus familiaris] (gi|545525163)	SSBP1	gi|545525163	[2]	19 kDa	TRUE	1	1	2	2	6
Cluster of PREDICTED: glutathione reductase, mitochondrial isoform X5 [Canis lupus familiaris] (gi|545526308)	GSR	gi|545526308	[3]	48 kDa	TRUE	3	0	3	0	6
PREDICTED: visinin-like 1 [Canis lupus familiaris]	LOC699459	gi|545527036		14 kDa		1	2	3	0	6
PREDICTED: CD81 protein [Canis lupus familiaris]	LOC611606	gi|545531540		33 kDa		0	1	2	3	6
Cluster of PREDICTED: toll-like receptor 9 isoform X2 [Canis lupus familiaris] (gi|545533080)	TLR9	gi|545533080	[2]	40 kDa	TRUE	0	1	3	2	6
PREDICTED: complement C3-like [Canis lupus familiaris]	LOC484960	gi|545535633		151 kDa	TRUE	1	1	2	2	6
PREDICTED: 40S ribosomal protein S21 isoform X2 [Canis lupus familiaris]	RPS21	gi|545541289	(+1)	9 kDa	TRUE	2	1	2	1	6
PREDICTED: eukaryotic translation initiation factor 6 isoform 1 [Canis lupus familiaris]	EIF6	gi|545541501		36 kDa		0	1	2	3	6
PREDICTED: PDZ and LIM domain protein 2 [Canis lupus familiaris]	PDLIM2	gi|545542501		29 kDa		0	3	2	1	6
PREDICTED: LOW QUALITY PROTEIN: sushi domain-containing protein 2 [Canis lupus familiaris]	SUSD2	gi|545544725		90 kDa		1	1	1	3	6
Cluster of PREDICTED: disco-interacting protein 2 homolog B isoform X2 [Canis lupus familiaris] (gi|545545510)	DIP2B	gi|545545510	[3]	172 kDa	TRUE	4	0	1	1	6
Cluster of PREDICTED: collagen alpha-1(III) chain-like [Canis lupus familiaris] (gi|545547105)	LOC102156355	gi|545547105	[2]	70 kDa	TRUE	3	1	1	1	6
PREDICTED: NHL repeat-containing protein 2 isoformX1 [Canis lupus familiaris]	NHLRC2	gi|545548000		83 kDa		1	1	3	1	6
PREDICTED: LOW QUALITY PROTEIN: alpha-mannosidase 2C1 [Canis lupus familiaris]	MAN2C1	gi|545550725		117 kDa		0	2	3	1	6
PREDICTED: hematopoietic lineage cell-specific protein [Canis lupus familiaris]	HCLS1	gi|545553025		54 kDa		0	2	2	2	6
PREDICTED: thioredoxin domain-containing protein 5 [Canis lupus familiaris]	TXNDC5	gi|545554347		39 kDa		1	2	1	2	6
PREDICTED: actin-related protein 2/3 complex subunit 2 [Canis lupus familiaris]	ARPC2	gi|545556450		34 kDa		3	1	1	1	6
Cluster of PREDICTED: ribosomal protein S6 kinase alpha-3 isoform X2 [Canis lupus familiaris] (gi|545557666)	RPS6KA3	gi|545557666	[5]	81 kDa	TRUE	1	1	2	2	6
Cluster of PREDICTED: synaptobrevin homolog YKT6 [Canis lupus familiaris] (gi|545560306)	YKT6	gi|545560306	[2]	23 kDa	TRUE	1	1	2	2	6
Cluster of PREDICTED: inter-alpha-trypsin inhibitor heavy chain H4 isoform X1 [Canis lupus familiaris] (gi|545560457)	ITIH4	gi|545560457	[2]	113 kDa	TRUE	2	1	2	1	6
sulfotransferase 1A1 [Canis lupus familiaris]	SULT1A1	gi|55741764		34 kDa	TRUE	1	0	2	3	6
ATP synthase subunit alpha, mitochondrial [Canis lupus familiaris]	ATP5A1	gi|560891938		60 kDa		1	0	1	4	6
PREDICTED: glucosamine 6-phosphate N-acetyltransferase isoform 2 [Canis lupus familiaris]	GNPNAT1	gi|57090155		21 kDa		2	2	2	0	6
PREDICTED: sulfotransferase 1C4 [Canis lupus familiaris]	SULT1C4	gi|57092831		35 kDa	TRUE	2	0	2	2	6
Cluster of PREDICTED: glutathione S-transferase A2 isoform 2 [Canis lupus familiaris] (gi|57094546)	GSTA3	gi|57094546		26 kDa	TRUE	2	2	1	1	6
PREDICTED: protein S100-A11 [Canis lupus familiaris]	S100A11	gi|57098823		12 kDa		1	2	1	2	6
Cluster of PREDICTED: serine protease 23 isoform X2 [Canis lupus familiaris] (gi|57102468)	PRSS23	gi|57102468	[2]	42 kDa	TRUE	4	1	0	1	6
PREDICTED: tropomodulin-3 isoform 1 [Canis lupus familiaris]	TMOD3	gi|57108515		40 kDa	TRUE	6	0	0	0	6
keratin, type I cytoskeletal 10 [Canis lupus familiaris]	Ker10	gi|61740600		58 kDa	TRUE	0	0	5	1	6
PREDICTED: nuclear migration protein nudC isoform 1 [Canis lupus familiaris]	NUDC	gi|73950139		38 kDa		0	1	3	2	6
PREDICTED: protein-arginine deiminase type-4 [Canis lupus familiaris]	PADI4	gi|73950711		74 kDa	TRUE	0	1	3	2	6
PREDICTED: arachidonate 15-lipoxygenase [Canis lupus familiaris]	ALOX15	gi|73955437		76 kDa	TRUE	0	0	4	2	6
PREDICTED: adenine phosphoribosyltransferase isoform X2 [Canis lupus familiaris]	APRT	gi|73956923		20 kDa		2	2	0	2	6
PREDICTED: integrin alpha-M isoformX2 [Canis lupus familiaris]	ITGAM	gi|73958268		128 kDa	TRUE	2	1	2	1	6
PREDICTED: guanylate-binding protein 6 [Canis lupus familiaris]	GBP6	gi|73960069		71 kDa		2	0	2	2	6
PREDICTED: adenylosuccinate synthetase isozyme 2 [Canis lupus familiaris]	ADSS	gi|73961442		50 kDa		1	2	2	1	6
Cluster of PREDICTED: glucosylceramidase isoform 2 [Canis lupus familiaris] (gi|73961599)	GBA	gi|73961599		60 kDa	TRUE	2	2	0	2	6
PREDICTED: alpha-N-acetylglucosaminidase [Canis lupus familiaris]	NAGLU	gi|73965663		83 kDa		1	3	1	1	6
PREDICTED: 26S proteasome non-ATPase regulatory subunit 11 isoformX1 [Canis lupus familiaris]	PSMD11	gi|73966860		47 kDa		2	1	0	3	6
PREDICTED: chloride intracellular channel protein 3 [Canis lupus familiaris]	CLIC3	gi|73967486		29 kDa	TRUE	2	1	1	2	6
PREDICTED: tetratricopeptide repeat protein 38 isoform 1 [Canis lupus familiaris]	TTC38	gi|73968897		52 kDa		1	1	1	3	6
PREDICTED: afamin [Canis lupus familiaris]	AFM	gi|73975389		69 kDa	TRUE	0	2	1	3	6
PREDICTED: interleukin-36 receptor antagonist protein isoform X2 [Canis lupus familiaris]	IL36RN	gi|73980848		17 kDa		1	1	2	2	6
PREDICTED: toll-interacting protein isoformX1 [Canis lupus familiaris]	TOLLIP	gi|73982590		30 kDa		1	1	2	2	6
PREDICTED: aspartate--tRNA ligase, cytoplasmic isoform 2 [Canis lupus familiaris]	DARS	gi|73984263		57 kDa		3	0	1	2	6
PREDICTED: ruvB-like 1 isoform 2 [Canis lupus familiaris]	RUVBL1	gi|73984468		50 kDa		1	1	2	2	6
Cluster of PREDICTED: NEDD8-activating enzyme E1 catalytic subunit isoformX3 [Canis lupus familiaris] (gi|73984898)	LOC101406354	gi|73984898	[2]	50 kDa	TRUE	1	0	2	3	6
Cluster of PREDICTED: serine/threonine-protein kinase OSR1 isoformX2 [Canis lupus familiaris] (gi|73989728)	OXSR1	gi|73989728		58 kDa	TRUE	0	2	2	2	6
PREDICTED: xylulose kinase isoform X1 [Canis lupus familiaris]	XYLB	gi|73990206		58 kDa		1	2	0	3	6
PREDICTED: BPI fold-containing family A member 1 [Canis lupus familiaris]	BPIFA1	gi|73992235		27 kDa		0	2	2	2	6
Cluster of PREDICTED: phosphatidylinositol transfer protein beta isoform isoformX2 [Canis lupus familiaris] (gi|73994863)	PITPNB	gi|73994863	[2]	32 kDa	TRUE	2	2	0	2	6
PREDICTED: GTP cyclohydrolase 1 feedback regulatory protein [Canis lupus familiaris]	GCHFR	gi|74000128		10 kDa		0	2	2	2	6
Cluster of PREDICTED: 60 kDa SS-A/Ro ribonucleoprotein isoform X2 [Canis lupus familiaris] (gi|74006050)	TROVE2	gi|74006050	[2]	61 kDa	TRUE	0	2	1	3	6
Cluster of gi|74008419|ref|XP_865808.1| PREDICTED: apoptosis-inducing factor 1, mitochondrial isoform 6 [Canis lupus familiaris] (gi|74008419|ref|XP_865808.1| PREDICTED: apoptosis-inducing factor 1, mitochondrial isoform 6 [Canis lupus familiaris]-DECOY)	AIFM1	gi|74008419|	ref|XP_865808.1| PREDICTED: apoptosis-inducing factor 1, mitochondrial isoform 6 [Canis lupus familiaris]-DECOY [3]	?	TRUE	1	0	2	3	6
lysosomal protective protein precursor [Canis lupus familiaris]	CTSA	gi|158186730	(+1)	57 kDa	TRUE	1	1	1	2	5
15 kDa selenoprotein precursor [Canis lupus familiaris]	SEP15	gi|168693433		18 kDa		2	1	1	1	5
26S proteasome non-ATPase regulatory subunit 4 [Canis lupus familiaris]	PSMD4	gi|212276034		41 kDa		1	1	2	1	5
testin [Canis lupus familiaris]	TES	gi|274326247		48 kDa		3	0	2	0	5
PREDICTED: LOW QUALITY PROTEIN: chromosome 10 open reading frame, human C2orf55 [Canis lupus familiaris]	C10H2orf55	gi|345776926		96 kDa	TRUE	3	1	1	0	5
PREDICTED: LOW QUALITY PROTEIN: plexin-B2 [Canis lupus familiaris]	PLXNB2	gi|345777068		205 kDa		1	1	1	2	5
PREDICTED: SH3 domain-binding protein 1 [Canis lupus familiaris]	SH3BP1	gi|345777075		75 kDa	TRUE	1	1	1	2	5
PREDICTED: UDP-glucuronic acid decarboxylase 1, partial [Canis lupus familiaris]	UXS1	gi|345777177		45 kDa		0	1	1	3	5
Cluster of PREDICTED: S-methyl-5'-thioadenosine phosphorylase isoform X2 [Canis lupus familiaris] (gi|345777483)	MTAP	gi|345777483		31 kDa	TRUE	0	2	2	1	5
PREDICTED: vacuolar protein sorting-associated protein 28 homolog isoformX1 [Canis lupus familiaris]	VPS28	gi|345779387		25 kDa		0	2	1	2	5
PREDICTED: sterile alpha motif domain containing 9-like [Canis lupus familiaris]	SAMD9L	gi|345780106		184 kDa		0	0	2	3	5
PREDICTED: gamma-glutamylcyclotransferase isoform X2 [Canis lupus familiaris]	GGCT	gi|345780308		21 kDa		0	1	2	2	5
PREDICTED: epidermal growth factor receptor substrate 15 [Canis lupus familiaris]	EPS15	gi|345780773		65 kDa		2	1	2	0	5
PREDICTED: 40S ribosomal protein S8 isoform 6 [Canis lupus familiaris]	RPS8	gi|345780888		24 kDa		2	1	1	1	5
PREDICTED: syndecan-1 [Canis lupus familiaris]	SDC1	gi|345781880		33 kDa		0	1	2	2	5
PREDICTED: protein MEMO1 [Canis lupus familiaris]	MEMO1	gi|345781967		37 kDa		0	1	3	1	5
PREDICTED: trichohyalin-like 1 [Canis lupus familiaris]	TCHHL1	gi|345782673		100 kDa		2	1	1	1	5
PREDICTED: epidermal growth factor receptor [Canis lupus familiaris]	EGFR	gi|345782950		132 kDa	TRUE	0	2	2	1	5
PREDICTED: NEDD8-conjugating enzyme Ubc12 [Canis lupus familiaris]	UBC12	gi|345785876		21 kDa		2	1	1	1	5
PREDICTED: LOW QUALITY PROTEIN: deoxyribonuclease-2-alpha [Canis lupus familiaris]	DNASE2	gi|345787754		41 kDa		1	2	1	1	5
PREDICTED: epithelial membrane protein 1 [Canis lupus familiaris]	EMP1	gi|345792383		18 kDa		3	1	0	1	5
PREDICTED: cystatin-A [Canis lupus familiaris]	CSTA	gi|345796081		11 kDa		2	2	0	1	5
Cluster of PREDICTED: 10 kDa heat shock protein, mitochondrial isoform 1 [Canis lupus familiaris] (gi|345797630)	HSPE1	gi|345797630	[2]	13 kDa	TRUE	0	1	2	2	5
PREDICTED: ubiquitin-protein ligase E3A isoformX8 [Canis lupus familiaris]	UBE3A	gi|345798007		100 kDa		2	1	1	1	5
PREDICTED: pro-cathepsin H [Canis lupus familiaris]	CTSH	gi|345798093		39 kDa		0	2	1	2	5
PREDICTED: ras GTPase-activating protein 1 [Canis lupus familiaris]	RASA1	gi|345798613		114 kDa		0	1	3	1	5
PREDICTED: threonine--tRNA ligase, cytoplasmic [Canis lupus familiaris]	TARS	gi|345798924		84 kDa	TRUE	3	0	1	1	5
PREDICTED: LOW QUALITY PROTEIN: interstitial collagenase [Canis lupus familiaris]	LOC489428	gi|345800008		54 kDa		2	1	1	1	5
Cluster of PREDICTED: very long-chain specific acyl-CoA dehydrogenase, mitochondrial isoformX1 [Canis lupus familiaris] (gi|345800108)	ACADVL	gi|345800108	[2]	70 kDa	TRUE	2	1	0	2	5
Cluster of PREDICTED: claudin-7 isoform X2 [Canis lupus familiaris] (gi|345800139)	CLDN7	gi|345800139	[2]	22 kDa	TRUE	2	0	1	2	5
Cluster of PREDICTED: plasminogen activator inhibitor 1 RNA-binding protein isoform 4 [Canis lupus familiaris] (gi|345800376)	SERBP1	gi|345800376	[2]	44 kDa	TRUE	2	0	2	1	5
PREDICTED: adapter molecule crk isoform 1 [Canis lupus familiaris]	CRK	gi|345805018		34 kDa	TRUE	0	0	2	3	5
PREDICTED: vacuolar protein-sorting-associated protein 25 [Canis lupus familiaris]	WNK4	gi|345805176		21 kDa		3	0	0	2	5
Cluster of PREDICTED: acetyl-CoA carboxylase 1 isoformX1 [Canis lupus familiaris] (gi|345805707)	ACACA	gi|345805707	[4]	260 kDa	TRUE	2	0	1	2	5
PREDICTED: actin related protein 2/3 complex, subunit 5-like isoform 2 [Canis lupus familiaris]	ARPC5L	gi|345806093		17 kDa		2	0	1	2	5
Cluster of eukaryotic translation initiation factor 3, subunit L [Canis lupus familiaris] (gi|353731063)	EIF3L	gi|353731063	[2]	67 kDa	TRUE	2	0	2	1	5
Cluster of eukaryotic peptide chain release factor subunit 1 [Canis lupus familiaris] (gi|356460984)	ETF1	gi|356460984	[2]	49 kDa	TRUE	0	1	2	2	5
alcohol dehydrogenase class-3 [Canis lupus familiaris]	J9PA83	gi|356461013		40 kDa	TRUE	0	1	1	3	5
Cluster of keratin 14 [Canis lupus familiaris] (gi|359279911)	KRT14	gi|359279911	[2]	52 kDa	TRUE	1	1	3	0	5
Cluster of PREDICTED: kinesin-1 heavy chain [Canis lupus familiaris] (gi|359318871)	KIF5B	gi|359318871	[2]	110 kDa	TRUE	0	0	1	4	5
PREDICTED: transportin-1 [Canis lupus familiaris]	TNPO1	gi|359318972		106 kDa	TRUE	2	1	2	0	5
PREDICTED: fumarylacetoacetate hydrolase domain-containing protein 2A isoform X1 [Canis lupus familiaris]	FAHD2A	gi|359321623		35 kDa		1	1	2	1	5
PREDICTED: peroxiredoxin-2 isoform 1 [Canis lupus familiaris]	PRDX2	gi|359322074		22 kDa	TRUE	0	2	2	1	5
PREDICTED: autophagy related 3 isoform X2 [Canis lupus familiaris]	ATG3	gi|359323726		35 kDa		3	1	0	1	5
cathelicidin antimicrobial peptide precursor [Canis lupus familiaris]	CAMP	gi|50979214		19 kDa		1	1	1	2	5
keratin, type II cytoskeletal 1 [Canis lupus familiaris]	KRT1	gi|50979272		64 kDa	TRUE	0	1	4	0	5
PREDICTED: ethylmalonyl-CoA decarboxylase isoform X1 [Canis lupus familiaris]	ECHDC1	gi|545485999		42 kDa		2	1	1	1	5
PREDICTED: platelet-activating factor acetylhydrolase IB subunit gamma isoform X1 [Canis lupus familiaris]	PAFAH1B3	gi|545488376		26 kDa		0	2	1	2	5
Cluster of PREDICTED: 26S protease regulatory subunit 6B isoform X3 [Canis lupus familiaris] (gi|545488514)	PSMC4	gi|545488514	[2]	44 kDa	TRUE	5	0	0	0	5
PREDICTED: delta(3,5)-Delta(2,4)-dienoyl-CoA isomerase, mitochondrial isoform 1 [Canis lupus familiaris]	ECH1	gi|545488605		38 kDa		3	0	1	1	5
PREDICTED: LOW QUALITY PROTEIN: eukaryotic translation initiation factor 3 subunit I [Canis lupus familiaris]	EIF3I	gi|545491433		40 kDa		0	1	2	2	5
Cluster of PREDICTED: fatty acid-binding protein, heart [Canis lupus familiaris] (gi|545491467)	FABP3	gi|545491467	[2]	15 kDa	TRUE	2	0	2	1	5
Cluster of gi|545491623|ref|XP_005617776.1| PREDICTED: synaptotagmin-like 1 isoform X3 [Canis lupus familiaris] (gi|545491623|ref|XP_005617776.1| PREDICTED: synaptotagmin-like 1 isoform X3 [Canis lupus familiaris]-DECOY)	SYTL1	gi|545491623	|ref|XP_005617776.1| PREDICTED: synaptotagmin-like 1 isoform X3 [Canis lupus familiaris]-DECOY [2]	?	TRUE	1	0	2	2	5
PREDICTED: aflatoxin B1 aldehyde reductase member 2 [Canis lupus familiaris]	AKR7A2	gi|545492089		41 kDa		1	0	1	3	5
Cluster of PREDICTED: LOW QUALITY PROTEIN: protocadherin gamma subfamily B, 3 [Canis lupus familiaris] (gi|545492142)	PCDHGB3	gi|545492142	[4]	177 kDa	TRUE	1	1	1	2	5
PREDICTED: aminopeptidase N isoform X1 [Canis lupus familiaris]	ANPEP	gi|545493161		110 kDa	TRUE	0	0	4	1	5
PREDICTED: hydroxymethylglutaryl-CoA synthase, cytoplasmic isoform X2 [Canis lupus familiaris]	HMGCS1	gi|545496246		57 kDa		1	0	2	2	5
PREDICTED: transmembrane protease serine 13 isoform X1 [Canis lupus familiaris]	TMPRSS13	gi|545497250	(+1)	59 kDa		2	0	1	2	5
Cluster of PREDICTED: serine/threonine-protein phosphatase 2A 65 kDa regulatory subunit A beta isoform isoformX3 [Canis lupus familiaris] (gi|545497447)	PPP2R1B	gi|545497447	[3]	68 kDa	TRUE	1	1	2	1	5
Cluster of PREDICTED: apoptosis-associated speck-like protein containing a CARD isoform X2 [Canis lupus familiaris] (gi|545501380)	PYCARD	gi|545501380	[2]	22 kDa	TRUE	2	0	2	1	5
PREDICTED: ferric-chelate reductase 1 [Canis lupus familiaris]	FRRS1	gi|545503103		66 kDa		1	1	2	1	5
PREDICTED: serine/threonine-protein phosphatase 2A 56 kDa regulatory subunit alpha isoform [Canis lupus familiaris]	PPP2R5A	gi|545504370		47 kDa		0	2	0	3	5
PREDICTED: apolipoprotein A-I binding protein [Canis lupus familiaris]	APOA1BP	gi|545505357		37 kDa		0	1	1	3	5
PREDICTED: protein CREG1, partial [Canis lupus familiaris]	CREG1	gi|545506124		23 kDa		1	1	1	2	5
PREDICTED: sec1 family domain-containing protein 1 isoformX2 [Canis lupus familiaris]	SCFD1	gi|545507016		72 kDa	TRUE	3	1	0	1	5
PREDICTED: methylmalonate-semialdehyde dehydrogenase [acylating], mitochondrial [Canis lupus familiaris]	ALDH6A1	gi|545508044		58 kDa		2	1	1	1	5
PREDICTED: galactokinase isoform X1 [Canis lupus familiaris]	GALK1	gi|545508922		38 kDa		1	0	3	1	5
Cluster of PREDICTED: bifunctional coenzyme A synthase isoform X2 [Canis lupus familiaris] (gi|545510540)	COASY	gi|545510540		67 kDa	TRUE	1	1	1	2	5
Cluster of PREDICTED: dynein light chain 2, cytoplasmic isoform X10 [Canis lupus familiaris] (gi|545511435)	DYNLL2	gi|545511435		12 kDa	TRUE	3	1	1	0	5
PREDICTED: alpha-2-antiplasmin isoform X3 [Canis lupus familiaris]	SERPINF2	gi|545512145		62 kDa		2	1	2	0	5
Cluster of PREDICTED: 60S ribosomal protein L12 isoform X1 [Canis lupus familiaris] (gi|545512400)	RPL12	gi|545512400	[2]	18 kDa	TRUE	0	2	2	1	5
Cluster of PREDICTED: hsc70-interacting protein isoform X1 [Canis lupus familiaris] (gi|545514286)	ST13	gi|545514286		40 kDa	TRUE	0	3	2	0	5
Cluster of PREDICTED: adenylosuccinate lyase isoform 1 [Canis lupus familiaris] (gi|545514747)	TNRC6B	gi|545514747		55 kDa	TRUE	1	1	2	1	5
Cluster of PREDICTED: calcineurin subunit B type 1 isoform X1 [Canis lupus familiaris] (gi|545515822)	PPP3R1	gi|545515822	[2]	20 kDa	TRUE	2	1	1	1	5
Cluster of PREDICTED: LOW QUALITY PROTEIN: glutamine--fructose-6-phosphate aminotransferase [isomerizing] 1 [Canis lupus familiaris] (gi|545515835)	GFPT1	gi|545515835		80 kDa	TRUE	2	0	2	1	5
PREDICTED: tetratricopeptide repeat protein 39B isoform X2 [Canis lupus familiaris]	TTC39B	gi|545517093	(+1)	68 kDa		1	1	1	2	5
PREDICTED: LOW QUALITY PROTEIN: 26S proteasome non-ATPase regulatory subunit 5, partial [Canis lupus familiaris]	PSMD5	gi|545518169		56 kDa		0	1	2	2	5
PREDICTED: complement C2 isoform 5 [Canis lupus familiaris]	C2	gi|545518573		90 kDa	TRUE	0	1	2	2	5
PREDICTED: carboxypeptidase A4 isoform X1 [Canis lupus familiaris]	CPA4	gi|545522026	(+1)	47 kDa	TRUE	2	0	2	1	5
Cluster of PREDICTED: heterogeneous nuclear ribonucleoproteins A2/B1 isoform X4 [Canis lupus familiaris] (gi|545522771)	SNRPB1	gi|545522771	[2]	37 kDa	TRUE	4	0	1	0	5
Cluster of PREDICTED: LPS-responsive vesicle trafficking, beach and anchor containing isoform X6 [Canis lupus familiaris] (gi|545524784)	LRBA	gi|545524784	[2]	318 kDa	TRUE	0	2	3	0	5
Cluster of PREDICTED: N(4)-(beta-N-acetylglucosaminyl)-L-asparaginase isoform X3 [Canis lupus familiaris] (gi|545526644)	AGA	gi|545526644	[2]	37 kDa	TRUE	2	0	2	1	5
PREDICTED: prominin-2 [Canis lupus familiaris]	PROM2	gi|545527761		92 kDa		2	0	0	3	5
PREDICTED: succinyl-CoA ligase [ADP/GDP-forming] subunit alpha, mitochondrial [Canis lupus familiaris]	SUCLG1	gi|545528017		36 kDa		1	0	2	2	5
PREDICTED: hornerin [Canis lupus familiaris]	LOC102157231	gi|545528977		156 kDa		4	0	0	1	5
PREDICTED: protein kinase C and casein kinase substrate in neurons protein 3 [Canis lupus familiaris]	PACSIN3	gi|545530185		64 kDa		1	1	0	3	5
PREDICTED: CD82 antigen isoform X1 [Canis lupus familiaris]	CD82	gi|545530315		34 kDa		0	1	1	3	5
PREDICTED: LOW QUALITY PROTEIN: neuroblast differentiation-associated protein AHNAK [Canis lupus familiaris]	AHNAK	gi|545531227		580 kDa		0	0	3	2	5
PREDICTED: endonuclease domain-containing 1 protein, partial [Canis lupus familiaris]	ENDOD1	gi|545535937		46 kDa	TRUE	1	0	2	2	5
Cluster of PREDICTED: attractin isoform X1 [Canis lupus familiaris] (gi|545540087)	ATRN	gi|545540087	[2]	165 kDa	TRUE	0	1	1	3	5
Cluster of PREDICTED: tyrosine-protein phosphatase non-receptor type substrate 1 isoform X2 [Canis lupus familiaris] (gi|545540192)	SIRPA	gi|545540192	[7]	55 kDa	TRUE	2	0	1	2	5
Cluster of PREDICTED: erythrocyte membrane protein band 4.1-like 1 isoform X5 [Canis lupus familiaris] (gi|545540531)	EPB41L1	gi|545540531	[2]	177 kDa	TRUE	1	0	2	2	5
Cluster of PREDICTED: 60S ribosomal protein L21 isoform X1 [Canis lupus familiaris] (gi|545541592)	RPL21	gi|545541592		19 kDa	TRUE	3	0	2	0	5
PREDICTED: secreted phosphoprotein 24 isoform X1 [Canis lupus familiaris]	SPP2	gi|545542937		23 kDa		2	0	1	2	5
PREDICTED: tyrosine-protein phosphatase non-receptor type 6 [Canis lupus familiaris]	PTPN6	gi|545546524		68 kDa	TRUE	0	1	2	2	5
PREDICTED: heterogeneous nuclear ribonucleoprotein F isoform X8 [Canis lupus familiaris]	HNRNPF	gi|545547317		46 kDa	TRUE	3	1	0	1	5
PREDICTED: interferon-induced protein with tetratricopeptide repeats 5 isoform X1 [Canis lupus familiaris]	IFIT5	gi|545547346		56 kDa		2	1	1	1	5
PREDICTED: cytosolic purine 5'-nucleotidase isoform X13 [Canis lupus familiaris]	NT5C2	gi|545547822		66 kDa	TRUE	0	1	2	2	5
Cluster of PREDICTED: ras-related protein Rab-2A isoform X1 [Canis lupus familiaris] (gi|545548508)	RAB2A	gi|545548508	[4]	22 kDa	TRUE	1	0	1	3	5
Cluster of PREDICTED: tumor protein D52 isoform X2 [Canis lupus familiaris] (gi|545548917)	TPD52	gi|545548917	[2]	21 kDa	TRUE	0	4	0	1	5
Cluster of PREDICTED: calcium/calmodulin-dependent protein kinase type II subunit delta isoform X14 [Canis lupus familiaris] (gi|545552328)	CAMK2D	gi|545552328	[5]	58 kDa	TRUE	3	0	0	2	5
PREDICTED: bifunctional glutamate/proline--tRNA ligase isoform X3 [Canis lupus familiaris]	EPRS	gi|545556719	(+1)	171 kDa		2	0	1	2	5
PREDICTED: poliovirus receptor-related protein 4 [Canis lupus familiaris]	PVRL4	gi|545557057		62 kDa	TRUE	2	1	1	1	5
PREDICTED: plexin-B3 [Canis lupus familiaris]	PLXNB3	gi|545559821		211 kDa	TRUE	0	2	2	1	5
Cluster of PREDICTED: prefoldin subunit 3 isoform X2 [Canis lupus familiaris] (gi|545559966)	VBP1	gi|545559966	[2]	21 kDa	TRUE	3	1	1	0	5
PREDICTED: LOW QUALITY PROTEIN: tubulin-specific chaperone D [Canis lupus familiaris]	TBCD	gi|545560270		138 kDa		0	1	2	2	5
beta-2-microglobulin precursor [Canis lupus familiaris]	B2M	gi|548923914		14 kDa		0	1	2	2	5
annexin A4 [Canis lupus familiaris]	ZAP36	gi|55742853		36 kDa	TRUE	1	1	3	0	5
retinal dehydrogenase 1 [Canis lupus familiaris]	ALDH1A1	gi|558757383		55 kDa	TRUE	1	1	1	2	5
PREDICTED: 26S proteasome non-ATPase regulatory subunit 7 isoform 1 [Canis lupus familiaris]	PSMD7	gi|57087181		37 kDa		3	1	0	1	5
PREDICTED: calcyclin-binding protein isoform X3 [Canis lupus familiaris]	CACYBP	gi|57088975		26 kDa		1	1	1	2	5
PREDICTED: V-type proton ATPase subunit G 1-like [Canis lupus familiaris]	LOC481939	gi|57095176		15 kDa	TRUE	3	0	1	1	5
PREDICTED: 60S ribosomal protein L18a isoform 1 [Canis lupus familiaris]	RPL18A	gi|57101324		21 kDa		2	0	1	2	5
Cluster of PREDICTED: protein Hikeshi isoformX1 [Canis lupus familiaris] (gi|57102310)	C11orf73	gi|57102310		22 kDa	TRUE	0	1	2	2	5
PREDICTED: heme-binding protein 1 [Canis lupus familiaris]	HEBP1	gi|57106504		21 kDa		0	2	0	3	5
PREDICTED: inositol monophosphatase 1 isoformX2 [Canis lupus familiaris]	IMPA1	gi|57107809		30 kDa		0	1	2	2	5
Cluster of PREDICTED: histone H1.4-like [Canis lupus familiaris] (gi|57110423)	HIST1H1E	gi|57110423	[5]	22 kDa	TRUE	4	0	1	0	5
PREDICTED: persulfide dioxygenase ETHE1, mitochondrial [Canis lupus familiaris]	ETHE1	gi|73948241		28 kDa		1	1	1	2	5
PREDICTED: elongation factor Tu GTP-binding domain-containing protein 1 isoform 6 [Canis lupus familiaris]	EFTUD1	gi|73951269		126 kDa		4	0	0	1	5
PREDICTED: complement component 1 Q subcomponent-binding protein, mitochondrial [Canis lupus familiaris]	C1QBP	gi|73955331		30 kDa		0	1	1	3	5
PREDICTED: serine--tRNA ligase, cytoplasmic isoform 3 [Canis lupus familiaris]	SARS	gi|73959359		59 kDa		1	2	1	1	5
PREDICTED: activator of 90 kDa heat shock protein ATPase homolog 1 isoform 1 [Canis lupus familiaris]	AHSA1	gi|73963740		38 kDa		1	2	1	1	5
PREDICTED: LIM and SH3 domain protein 1 isoform 2 [Canis lupus familiaris]	LASP1	gi|73966152		30 kDa	TRUE	1	2	2	0	5
PREDICTED: transmembrane protease serine 11D [Canis lupus familiaris]	TMPRSS11D	gi|73975345		47 kDa		4	0	0	1	5
PREDICTED: serum paraoxonase/arylesterase 1 isoform 2 [Canis lupus familiaris]	PON1	gi|73975797		40 kDa		1	1	1	2	5
Cluster of PREDICTED: protein farnesyltransferase/geranylgeranyltransferase type-1 subunit alpha isoformX1 [Canis lupus familiaris] (gi|73979092)	FNTA	gi|73979092		45 kDa	TRUE	1	1	0	3	5
Cluster of PREDICTED: protein phosphatase 1G isoformX2 [Canis lupus familiaris] (gi|73979982)	PPM1G	gi|73979982	[2]	59 kDa	TRUE	1	1	1	2	5
PREDICTED: putative peptidyl-tRNA hydrolase PTRHD1 [Canis lupus familiaris]	PTRHD1	gi|73980620		16 kDa		3	1	0	1	5
Cluster of PREDICTED: protein SEC13 homolog isoformX1 [Canis lupus familiaris] (gi|73984696)	SEC13	gi|73984696	[2]	36 kDa	TRUE	1	2	1	1	5
Cluster of PREDICTED: dnaJ homolog subfamily B member 1 isoformX2 [Canis lupus familiaris] (gi|73986278)	DNAJB1	gi|73986278	[2]	38 kDa	TRUE	0	2	2	1	5
Cluster of gi|73987361|ref|XP_854646.1| PREDICTED: calponin-2 isoformX1 [Canis lupus familiaris] (gi|73987361|ref|XP_854646.1| PREDICTED: calponin-2 isoformX1 [Canis lupus familiaris]-DECOY)	CNN2	gi|73987361|	ref|XP_854646.1| PREDICTED: calponin-2 isoformX1 [Canis lupus familiaris]-DECOY [2]	?	TRUE	0	1	2	2	5
PREDICTED: tyrosine-protein kinase HCK [Canis lupus familiaris]	HCK	gi|73992136		70 kDa	TRUE	0	2	2	1	5
PREDICTED: dynein light chain 1, cytoplasmic isoform 4 [Canis lupus familiaris]	DYNLL1	gi|73994732		10 kDa	TRUE	0	3	0	2	5
PREDICTED: eukaryotic translation initiation factor 3 subunit A isoformX2 [Canis lupus familiaris]	EIF3A	gi|73998665		163 kDa	TRUE	0	1	1	3	5
PREDICTED: serine/threonine-protein kinase PAK 2 isoform 1 [Canis lupus familiaris]	PAK2	gi|74002818		58 kDa	TRUE	1	1	2	1	5
PREDICTED: fetuin-B [Canis lupus familiaris]	FETUB	gi|74003556		42 kDa		0	2	2	1	5
Cluster of PREDICTED: histone-binding protein RBBP7 isoformX3 [Canis lupus familiaris] (gi|74006545)	RBBP7	gi|74006545	[4]	52 kDa	TRUE	2	0	1	2	5
Cluster of PREDICTED: protein PBDC1 isoformX1 [Canis lupus familiaris] (gi|74007756)	PBDC1	gi|74007756	[2]	25 kDa	TRUE	2	0	1	2	5
dual specificity mitogen-activated protein kinase kinase 2 [Canis lupus familiaris]	MAP2K2	gi|114326375		44 kDa	TRUE	0	2	2	0	4
GDP-fucose protein O-fucosyltransferase 1 precursor [Canis lupus familiaris]	pofut1	gi|116488396		44 kDa		0	2	1	1	4
glutathione peroxidase 1 [Canis lupus familiaris]	GPX1	gi|169403978		22 kDa	TRUE	2	1	1	0	4
Cluster of LUC7-like 2 [Canis lupus familiaris] (gi|197085591)	LUC7L2	gi|197085591	[2]	47 kDa	TRUE	1	1	1	1	4
DNA-(apurinic or apyrimidinic site) lyase [Canis lupus familiaris]	APEX1	gi|223278420		35 kDa		0	2	1	1	4
Cluster of glutathione peroxidase 3 precursor [Canis lupus familiaris] (gi|256574824)	GPX3	gi|256574824		25 kDa	TRUE	3	0	0	1	4
selenide, water dikinase 1 [Canis lupus familiaris]	SEPHS1	gi|298676507		43 kDa	TRUE	2	1	0	1	4
Cluster of hydroxysteroid dehydrogenase-like protein 2 [Canis lupus familiaris] (gi|312283574)	HSDL2	gi|312283574	[2]	46 kDa	TRUE	1	2	0	1	4
PREDICTED: transforming growth factor-beta-induced protein ig-h3 [Canis lupus familiaris]	TGFBI	gi|345777766		101 kDa		0	1	1	2	4
PREDICTED: sorting nexin-2 isoform 1 [Canis lupus familiaris]	SNX2	gi|345777938		46 kDa	TRUE	1	0	2	1	4
PREDICTED: ephrin type-A receptor 1 [Canis lupus familiaris]	EPHA1	gi|345781192		107 kDa		1	1	1	1	4
PREDICTED: plasminogen activator inhibitor 2 [Canis lupus familiaris]	SERPINB2	gi|345784331		46 kDa	TRUE	0	2	2	0	4
PREDICTED: costars family protein ABRACL [Canis lupus familiaris]	ABRACL	gi|345784619		9 kDa		0	0	2	2	4
Cluster of PREDICTED: SUMO-activating enzyme subunit 2 isoformX1 [Canis lupus familiaris] (gi|345785166)	UBA2	gi|345785166	[2]	71 kDa	TRUE	0	2	2	0	4
PREDICTED: thimet oligopeptidase [Canis lupus familiaris]	THOP1	gi|345786771		78 kDa	TRUE	0	1	1	2	4
PREDICTED: AP-1 complex subunit mu-2 [Canis lupus familiaris]	AP1M2	gi|345787199		51 kDa	TRUE	2	0	2	0	4
PREDICTED: AP-1 complex subunit mu-1 isoform X2 [Canis lupus familiaris]	AP1M1	gi|345787660		50 kDa	TRUE	1	0	2	1	4
PREDICTED: oxidoreductase HTATIP2 isoform X2 [Canis lupus familiaris]	HTATIP2	gi|345788260		32 kDa		1	1	1	1	4
PREDICTED: BTB/POZ domain-containing protein KCTD12 [Canis lupus familiaris]	KCTD12	gi|345788663		36 kDa	TRUE	1	1	2	0	4
PREDICTED: adipocyte plasma membrane-associated protein [Canis lupus familiaris]	APMAP	gi|345789049		46 kDa		0	0	3	1	4
PREDICTED: nucleolin isoform 1 [Canis lupus familiaris]	NCL	gi|345790650		77 kDa		2	0	0	2	4
PREDICTED: potassium-transporting ATPase alpha chain 2 [Canis lupus familiaris]	ATP12A	gi|345790679		115 kDa	TRUE	0	1	1	2	4
PREDICTED: UPF0160 protein MYG1, mitochondrial [Canis lupus familiaris]	C12orf10	gi|345791678		43 kDa		1	0	2	1	4
PREDICTED: PITH domain-containing protein 1 [Canis lupus familiaris]	PITHD1	gi|345793679		24 kDa		3	0	0	1	4
PREDICTED: protein CASC4 isoformX2 [Canis lupus familiaris]	CASC4	gi|345794875		49 kDa	TRUE	0	1	1	2	4
PREDICTED: polypeptide N-acetylgalactosaminyltransferase 5 [Canis lupus familiaris]	GALNT5	gi|345797223		68 kDa	TRUE	1	1	1	1	4
Cluster of PREDICTED: methionine adenosyltransferase 2 subunit beta isoform 2 [Canis lupus familiaris] (gi|345799407)	MAT2B	gi|345799407	[2]	37 kDa	TRUE	0	2	1	1	4
PREDICTED: beta-1,3-N-acetylglucosaminyltransferase lunatic fringe, partial [Canis lupus familiaris]	LFNG	gi|345801466		27 kDa		1	1	0	2	4
PREDICTED: vasorin [Canis lupus familiaris]	VASN	gi|345802354		71 kDa		0	1	1	2	4
PREDICTED: protein S100-A6 isoform 1 [Canis lupus familiaris]	S100A6	gi|345802696		10 kDa		0	0	1	3	4
PREDICTED: tetratricopeptide repeat protein 9A [Canis lupus familiaris]	TTC9	gi|345803993		22 kDa		2	0	1	1	4
prefoldin subunit 5 [Canis lupus familiaris]	PFDN5	gi|354459059		17 kDa		2	1	1	0	4
ribosomal protein S15a [Canis lupus familiaris]	RPS15A	gi|356460989		15 kDa	TRUE	0	1	1	2	4
Cluster of 60S ribosomal protein L3 [Canis lupus familiaris] (gi|356461025)	RPL3	gi|356461025		46 kDa	TRUE	1	1	1	1	4
60S ribosomal protein L4 [Canis lupus familiaris]	RPL4	gi|356991214	(+1)	47 kDa		1	1	1	1	4
Cluster of PREDICTED: AP-2 complex subunit alpha-1 isoform 2 [Canis lupus familiaris] (gi|359318599)	AP2A1	gi|359318599		105 kDa	TRUE	0	1	2	1	4
PREDICTED: acyl-protein thioesterase 2 [Canis lupus familiaris]	LYPLA2	gi|359318941		25 kDa		2	0	0	2	4
Cluster of PREDICTED: dnaJ homolog subfamily A member 2 [Canis lupus familiaris] (gi|359319053)	DNAJA2	gi|359319053	[2]	46 kDa	TRUE	1	1	0	2	4
PREDICTED: LOW QUALITY PROTEIN: tumor-associated calcium signal transducer 2 [Canis lupus familiaris]	TACSTD2	gi|359319375		37 kDa		0	1	1	2	4
PREDICTED: NEDD8-activating enzyme E1 regulatory subunit [Canis lupus familiaris]	NAE1	gi|359319592		60 kDa		1	1	1	1	4
Cluster of PREDICTED: sorting nexin-3 isoformX2 [Canis lupus familiaris] (gi|359320868)	SNX3	gi|359320868	[3]	19 kDa	TRUE	1	1	2	0	4
Cluster of PREDICTED: poly(ADP-ribose) glycohydrolase ARH3 isoform X2 [Canis lupus familiaris] (gi|359321290)	ADPRHL2	gi|359321290	[2]	39 kDa	TRUE	1	0	1	2	4
PREDICTED: protein TSSC1 [Canis lupus familiaris]	TSSC1	gi|359321539		44 kDa		4	0	0	0	4
PREDICTED: COP9 signalosome complex subunit 4 isoform X1 [Canis lupus familiaris]	COPS4	gi|359323636		46 kDa		1	1	1	1	4
apoptosis regulator BAX [Canis lupus familiaris]	BAX	gi|50978630		21 kDa		3	0	1	0	4
metalloproteinase inhibitor 2 precursor [Canis lupus familiaris]	TIMP2	gi|50978760		24 kDa		1	1	2	0	4
pleckstrin [Canis lupus familiaris]	PLEK	gi|50979228		40 kDa		1	1	1	1	4
PREDICTED: serpin B7 isoform X1 [Canis lupus familiaris]	SERPINB7	gi|545485124		43 kDa	TRUE	1	1	1	1	4
PREDICTED: serpin B12 [Canis lupus familiaris]	SERPINB12	gi|545485136		48 kDa		1	0	3	0	4
Cluster of PREDICTED: COBW domain-containing protein 2 isoform X2 [Canis lupus familiaris] (gi|545486649)	CBWD2	gi|545486649	[2]	42 kDa	TRUE	3	0	1	0	4
Cluster of PREDICTED: small nuclear ribonucleoprotein E-like [Canis lupus familiaris] (gi|545486755)	LOC102153759	gi|545486755	[2]	11 kDa	TRUE	1	0	1	2	4
Cluster of PREDICTED: branched-chain-amino-acid aminotransferase, mitochondrial isoformX2 [Canis lupus familiaris] (gi|545487843)	BCAT2	gi|545487843	[3]	55 kDa	TRUE	2	0	1	1	4
PREDICTED: programmed cell death protein 5 [Canis lupus familiaris]	PDCD5	gi|545489072		13 kDa		2	0	2	0	4
PREDICTED: marginal zone B- and B1-cell-specific protein [Canis lupus familiaris]	MZB1	gi|545490268		22 kDa		2	1	1	0	4
PREDICTED: dihydropyrimidinase-related protein 3 isoform X3 [Canis lupus familiaris]	DPYSL3	gi|545490589		58 kDa	TRUE	1	1	0	2	4
PREDICTED: calpain small subunit 2 [Canis lupus familiaris]	CAPNS2	gi|545491117		28 kDa	TRUE	2	1	1	0	4
Cluster of PREDICTED: LOW QUALITY PROTEIN: cytoplasmic FMR1-interacting protein 1 [Canis lupus familiaris] (gi|545493026)	CYFIP1	gi|545493026	[2]	161 kDa	TRUE	0	0	2	2	4
Cluster of PREDICTED: dihydrofolate reductase-like, partial [Canis lupus familiaris] (gi|545493067)	LOC479165	gi|545493067	[2]	19 kDa	TRUE	0	1	1	2	4
PREDICTED: fibroblast growth factor-binding protein 1 [Canis lupus familiaris]	FGFBP1	gi|545494003		29 kDa		2	0	1	1	4
PREDICTED: lactadherin [Canis lupus familiaris]	MFGE8	gi|545494454		48 kDa	TRUE	0	1	1	2	4
Cluster of PREDICTED: hexokinase-1 isoform X1 [Canis lupus familiaris] (gi|545495108)	HK1	gi|545495108	[2]	104 kDa	TRUE	1	0	2	1	4
Cluster of PREDICTED: adenosine kinase isoform X9 [Canis lupus familiaris] (gi|545495369)	ADK	gi|545495369	[4]	37 kDa	TRUE	0	1	1	2	4
Cluster of PREDICTED: 40S ribosomal protein S14 isoform X4 [Canis lupus familiaris] (gi|545496083)	RPS14	gi|545496083	[2]	14 kDa	TRUE	3	0	0	1	4
PREDICTED: LOW QUALITY PROTEIN: suppressor of tumorigenicity 14 protein [Canis lupus familiaris]	ST14	gi|545496781		92 kDa	TRUE	0	1	1	2	4
PREDICTED: sex hormone-binding globulin isoform X3 [Canis lupus familiaris]	SHBG	gi|545497981		44 kDa		3	0	1	0	4
Cluster of PREDICTED: cytosolic acyl coenzyme A thioester hydrolase isoform X1 [Canis lupus familiaris] (gi|545499238)	ACOT7	gi|545499238	[2]	41 kDa	TRUE	3	0	1	0	4
PREDICTED: uncharacterized protein KIAA0513 isoform X1 [Canis lupus familiaris]	KIAA0513	gi|545499700		47 kDa		0	2	1	1	4
Cluster of PREDICTED: calcineurin-like phosphoesterase domain containing 1 isoform X1 [Canis lupus familiaris] (gi|545502153)	CPPED1	gi|545502153	[2]	30 kDa	TRUE	0	1	1	2	4
PREDICTED: receptor-type tyrosine-protein phosphatase C isoform X1 [Canis lupus familiaris]	PTPRC	gi|545504163		148 kDa		0	0	2	2	4
Cluster of PREDICTED: phosphomevalonate kinase isoform X2 [Canis lupus familiaris] (gi|545505582)	PMVK	gi|545505582	[2]	25 kDa	TRUE	1	1	1	1	4
PREDICTED: specifically androgen-regulated gene protein [Canis lupus familiaris]	C7H1orf116	gi|545506078		61 kDa		0	1	1	2	4
PREDICTED: ragulator complex protein LAMTOR5-like [Canis lupus familiaris]	LOC102156380	gi|545512964		10 kDa		1	1	1	1	4
PREDICTED: cysteine-rich with EGF-like domains 2 [Canis lupus familiaris]	CRELD2	gi|545514391		42 kDa		0	1	1	2	4
Cluster of PREDICTED: AP2-associated protein kinase 1 isoform X3 [Canis lupus familiaris] (gi|545515851)	AAK1	gi|545515851	[4]	98 kDa	TRUE	0	2	0	2	4
Cluster of PREDICTED: TBC1 domain family member 9B isoform X3 [Canis lupus familiaris] (gi|545516136)	TBC1D9B	gi|545516136		140 kDa	TRUE	1	0	1	2	4
PREDICTED: alpha-1-acid glycoprotein 1 isoform X2 [Canis lupus familiaris]	ORM1	gi|545518002		23 kDa		2	1	1	0	4
Cluster of PREDICTED: phosphoacetylglucosamine mutase isoformX1 [Canis lupus familiaris] (gi|545519756)	PGM3	gi|545519756	[2]	62 kDa	TRUE	1	1	1	1	4
PREDICTED: uncharacterized protein LOC474977 [Canis lupus familiaris]	SH3BGRL2	gi|545520326		32 kDa		0	1	2	1	4
Cluster of PREDICTED: oxidation resistance protein 1 isoform X8 [Canis lupus familiaris] (gi|545520580)	OXR1	gi|545520580	[3]	96 kDa	TRUE	1	1	1	1	4
Cluster of PREDICTED: multifunctional protein ADE2 isoform X3 [Canis lupus familiaris] (gi|545521590)	PAICS	gi|545521590	[2]	94 kDa	TRUE	1	2	0	1	4
PREDICTED: c-X-C motif chemokine 6 isoform X2 [Canis lupus familiaris]	LOC106557449	gi|545521795		12 kDa		1	0	1	2	4
PREDICTED: transmembrane protease serine 11G-like [Canis lupus familiaris]	LOC611685	gi|545521892		48 kDa		1	0	1	2	4
Cluster of PREDICTED: chromobox protein homolog 3 isoformX5 [Canis lupus familiaris] (gi|545522782)	CBX3	gi|545522782		21 kDa	TRUE	2	1	1	0	4
PREDICTED: inhibitor of nuclear factor kappa-B kinase subunit beta isoform X1 [Canis lupus familiaris]	IKBKB	gi|545526053		87 kDa		0	1	2	1	4
PREDICTED: selenium-binding protein 1 [Canis lupus familiaris]	SELENBP1	gi|545528914		52 kDa		0	1	0	3	4
Cluster of PREDICTED: cytochrome b5-like [Canis lupus familiaris] (gi|545529104)	LOC102156618	gi|545529104		19 kDa	TRUE	4	0	0	0	4
PREDICTED: prostaglandin F2 receptor negative regulator [Canis lupus familiaris]	PTGFRN	gi|545529107		106 kDa		2	0	1	1	4
PREDICTED: eukaryotic translation initiation factor 3 subunit M [Canis lupus familiaris]	EIF3M	gi|545529881		43 kDa		1	1	1	1	4
Cluster of PREDICTED: ubiquitin/ISG15-conjugating enzyme E2 L6 isoform X2 [Canis lupus familiaris] (gi|545530026)	UBE2L6	gi|545530026		14 kDa	TRUE	0	0	1	3	4
Cluster of PREDICTED: nucleosome assembly protein 1-like 4 isoform X3 [Canis lupus familiaris] (gi|545530424)	NAP1L4	gi|545530424	[2]	43 kDa	TRUE	1	1	1	1	4
Cluster of PREDICTED: tRNA methyltransferase 112 homolog isoform X1 [Canis lupus familiaris] (gi|545530996)	TRMT112	gi|545530996		13 kDa	TRUE	1	0	2	1	4
PREDICTED: probable protein BRICK1-like [Canis lupus familiaris]	LOC607701	gi|545532718		13 kDa		0	1	2	1	4
Cluster of PREDICTED: neural cell adhesion molecule L1-like protein isoform X1 [Canis lupus familiaris] (gi|545532924)	CHL1	gi|545532924	[2]	137 kDa	TRUE	1	1	1	1	4
Cluster of PREDICTED: dynamin-2 isoform X23 [Canis lupus familiaris] (gi|545534693)	DNM2	gi|545534693	[2]	99 kDa	TRUE	0	1	0	3	4
PREDICTED: LOW QUALITY PROTEIN: lon protease homolog, mitochondrial isoform 1 [Canis lupus familiaris]	LONP1	gi|545535071		107 kDa		3	0	0	1	4
PREDICTED: ATP synthase subunit delta, mitochondrial [Canis lupus familiaris]	ATP5D	gi|545535445		21 kDa		1	1	1	1	4
PREDICTED: LOW QUALITY PROTEIN: neurobeachin-like 2 [Canis lupus familiaris]	NBEAL2	gi|545535567		298 kDa	TRUE	2	0	2	0	4
PREDICTED: LOW QUALITY PROTEIN: nuclear mitotic apparatus protein 1 [Canis lupus familiaris]	NUMA1	gi|545536505		239 kDa		1	0	2	1	4
PREDICTED: uncharacterized protein LOC102155154 [Canis lupus familiaris]	LOC102155154	gi|545539567		29 kDa		1	1	1	1	4
Cluster of PREDICTED: prefoldin subunit 4 isoform X1 [Canis lupus familiaris] (gi|545541107)	PFDN4	gi|545541107	[2]	20 kDa	TRUE	2	0	1	1	4
Cluster of PREDICTED: vacuolar protein-sorting-associated protein 36 isoform X2 [Canis lupus familiaris] (gi|545541602)	VPS36	gi|545541602	[2]	53 kDa	TRUE	2	0	0	2	4
PREDICTED: glypican-1 [Canis lupus familiaris]	GPC1	gi|545543124		67 kDa		0	1	2	1	4
PREDICTED: d-2-hydroxyglutarate dehydrogenase, mitochondrial isoform X1 [Canis lupus familiaris]	D2HGDH	gi|545543222		47 kDa		0	1	2	1	4
PREDICTED: coronin-1C isoform X4 [Canis lupus familiaris]	CORO1C	gi|545544157		53 kDa	TRUE	1	1	1	1	4
Cluster of gi|545545901|ref|XP_005637042.1| PREDICTED: kinesin family member 21A isoform X9 [Canis lupus familiaris] (gi|545545901|ref|XP_005637042.1| PREDICTED: kinesin family member 21A isoform X9 [Canis lupus familiaris]-DECOY)	KIF21A	gi|545545901	|ref|XP_005637042.1| PREDICTED: kinesin family member 21A isoform X9 [Canis lupus familiaris]-DECOY [3]	?	TRUE	0	1	1	2	4
PREDICTED: complement C1s subcomponent isoform X3 [Canis lupus familiaris]	C1S	gi|545546519		78 kDa		2	1	1	0	4
Cluster of PREDICTED: V-type proton ATPase subunit E 1 isoform X1 [Canis lupus familiaris] (gi|545547009)	ATP6V1E1	gi|545547009		26 kDa	TRUE	0	0	3	1	4
PREDICTED: keratin, type II cytoskeletal 1b [Canis lupus familiaris]	LOC100683333	gi|545547078		61 kDa	TRUE	4	0	0	0	4
PREDICTED: enoyl-CoA hydratase, mitochondrial [Canis lupus familiaris]	ECHS1	gi|545548490		38 kDa		0	0	2	2	4
PREDICTED: sulfide:quinone oxidoreductase, mitochondrial isoform X4 [Canis lupus familiaris]	SQRDL	gi|545549779		50 kDa		0	1	1	2	4
PREDICTED: COP9 signalosome complex subunit 2 isoform X2 [Canis lupus familiaris]	COPS2	gi|545549832	(+1)	52 kDa		0	1	2	1	4
PREDICTED: ADP-dependent glucokinase isoform X2 [Canis lupus familiaris]	ADPGK	gi|545550366		54 kDa		1	1	2	0	4
Cluster of PREDICTED: semaphorin-7A isoform X1 [Canis lupus familiaris] (gi|545550464)	SEMA7A	gi|545550464		73 kDa	TRUE	2	0	1	1	4
Cluster of PREDICTED: amyloid beta A4 protein isoform X3 [Canis lupus familiaris] (gi|545550744)	APP	gi|545550744	[2]	83 kDa	TRUE	2	1	0	1	4
Cluster of PREDICTED: coxsackievirus and adenovirus receptor homolog isoform X2 [Canis lupus familiaris] (gi|545550858)	CXADR	gi|545550858	[2]	38 kDa	TRUE	1	1	1	1	4
PREDICTED: ES1 protein homolog, mitochondrial [Canis lupus familiaris]	C31H21orf33	gi|545551504		32 kDa		4	0	0	0	4
PREDICTED: 3-hydroxybutyrate dehydrogenase type 2 [Canis lupus familiaris]	BDH2	gi|545552144		27 kDa		3	0	0	1	4
PREDICTED: caspase-6 isoform 2 [Canis lupus familiaris]	CASP6	gi|545552238		54 kDa	TRUE	0	1	1	2	4
PREDICTED: [Protein ADP-ribosylarginine] hydrolase [Canis lupus familiaris]	ADPRH	gi|545552963		40 kDa		2	1	1	0	4
PREDICTED: mucin-13 [Canis lupus familiaris]	MUC13	gi|545553295		61 kDa		0	0	2	2	4
Cluster of PREDICTED: actin-like 6A isoform X4 [Canis lupus familiaris] (gi|545553528)	ACTL6A	gi|545553528	[2]	50 kDa	TRUE	3	1	0	0	4
PREDICTED: eukaryotic translation initiation factor 4 gamma 1 [Canis lupus familiaris]	EIF4G1	gi|545554149		164 kDa	TRUE	1	1	1	1	4
Cluster of PREDICTED: aspartyl aminopeptidase isoform X1 [Canis lupus familiaris] (gi|545556315)	DNPEP	gi|545556315	[2]	55 kDa	TRUE	1	1	1	1	4
PREDICTED: 4-trimethylaminobutyraldehyde dehydrogenase [Canis lupus familiaris]	ALDH9A1	gi|545556771		54 kDa	TRUE	0	2	0	2	4
Cluster of PREDICTED: ATP-dependent RNA helicase DDX3X isoform X13 [Canis lupus familiaris] (gi|545557867)	DDX3X	gi|545557867	[2]	73 kDa	TRUE	0	1	2	1	4
Cluster of PREDICTED: zinc finger protein 185 isoform X9 [Canis lupus familiaris] (gi|545559761)	ZNF185	gi|545559761	[4]	71 kDa	TRUE	0	1	1	2	4
PREDICTED: probable ubiquitin carboxyl-terminal hydrolase FAF-X [Canis lupus familiaris]	USP9X	gi|545560046		221 kDa		1	0	0	3	4
Cluster of PREDICTED: LOW QUALITY PROTEIN: protein AHNAK2, partial [Canis lupus familiaris] (gi|545560818)	LOC490881	gi|545560818	[2]	356 kDa	TRUE	0	1	2	1	4
interleukin-6 receptor subunit beta precursor [Canis lupus familiaris]	IL6ST	gi|559098451		104 kDa		1	1	2	0	4
S-adenosylmethionine synthase isoform type-2 [Canis lupus familiaris]	MAT2A	gi|559146618		44 kDa	TRUE	2	0	0	2	4
Cluster of AP-2 complex subunit mu [Canis lupus familiaris] (gi|560186497)	mu2	gi|560186497	[2]	50 kDa	TRUE	1	2	0	1	4
PREDICTED: 40S ribosomal protein S5 isoform 1 [Canis lupus familiaris]	RPS5	gi|57036143		23 kDa		2	0	1	1	4
Cluster of PREDICTED: complement component C8 gamma chain isoform X2 [Canis lupus familiaris] (gi|57091989)	C8G	gi|57091989		23 kDa	TRUE	1	1	1	1	4
PREDICTED: proline synthase co-transcribed bacterial homolog protein [Canis lupus familiaris]	PROSC	gi|57097863		30 kDa		1	0	0	3	4
PREDICTED: 40S ribosomal protein S3 isoform 1 [Canis lupus familiaris]	Rps3	gi|57102362		27 kDa		1	1	1	1	4
PREDICTED: tumor susceptibility gene 101 protein isoform 1 [Canis lupus familiaris]	TSG101	gi|57103026		44 kDa		3	0	1	0	4
Cluster of hepatocyte growth factor activator precursor [Canis lupus familiaris] (gi|73532760)	HGFAC	gi|73532760	[2]	70 kDa	TRUE	1	1	1	1	4
PREDICTED: 40S ribosomal protein S12 isoform 2 [Canis lupus familiaris]	RPS12	gi|73945531		15 kDa		1	1	2	0	4
PREDICTED: serpin B11 isoform X3 [Canis lupus familiaris]	SERPINB11	gi|73945845		45 kDa	TRUE	0	1	1	2	4
PREDICTED: nucleobindin-1 isoform 1 [Canis lupus familiaris]	NUCB1	gi|73947136		53 kDa	TRUE	0	1	1	2	4
PREDICTED: inter-alpha-trypsin inhibitor heavy chain H2 [Canis lupus familiaris]	ITIH2	gi|73949158		107 kDa		0	1	2	1	4
PREDICTED: chloride intracellular channel protein 4 [Canis lupus familiaris]	CLIC4	gi|73950600		29 kDa	TRUE	2	0	1	1	4
PREDICTED: translin-associated protein X isoform 1 [Canis lupus familiaris]	TSNAX	gi|73952516		33 kDa		1	0	1	2	4
PREDICTED: developmentally-regulated GTP-binding protein 2 [Canis lupus familiaris]	DRG2	gi|73956213		41 kDa		3	1	0	0	4
PREDICTED: dual specificity mitogen-activated protein kinase kinase 3 [Canis lupus familiaris]	MAP2K3	gi|73956283		39 kDa	TRUE	0	1	1	2	4
PREDICTED: argininosuccinate lyase isoformX2 [Canis lupus familiaris]	ASL	gi|73957609		52 kDa		0	0	3	1	4
Cluster of PREDICTED: pancreatic alpha-amylase [Canis lupus familiaris] (gi|73959975)	AMY2A	gi|73959975	[3]	20 kDa	TRUE	0	1	2	1	4
Cluster of PREDICTED: protein arginine N-methyltransferase 5 isoform 11 [Canis lupus familiaris] (gi|73962377)	PRMT5	gi|73962377	[2]	71 kDa	TRUE	0	1	1	2	4
PREDICTED: phosphoribosyl pyrophosphate synthase-associated protein 1 isoform 1 [Canis lupus familiaris]	PRPSAP1	gi|73964837		42 kDa	TRUE	2	1	1	0	4
Cluster of PREDICTED: galactose-1-phosphate uridylyltransferase isoformX2 [Canis lupus familiaris] (gi|73971197)	GALT	gi|73971197	[2]	44 kDa	TRUE	0	0	1	3	4
PREDICTED: allograft inflammatory factor 1 isoform 1 [Canis lupus familiaris]	AIF1	gi|73972188		17 kDa		1	1	1	1	4
PREDICTED: 60S ribosomal protein L8 isoform 3 [Canis lupus familiaris]	RPL8	gi|73974792		28 kDa		2	0	1	1	4
Cluster of PREDICTED: receptor-type tyrosine-protein phosphatase F isoformX3 [Canis lupus familiaris] (gi|73977245)	PTPRF	gi|73977245	[2]	211 kDa	TRUE	2	0	1	1	4
PREDICTED: F-box only protein 3 isoform 3 [Canis lupus familiaris]	FBXO3	gi|73982195		55 kDa		0	0	3	1	4
PREDICTED: peptidyl-prolyl cis-trans isomerase FKBP2 isoformX1 [Canis lupus familiaris]	FKBP2	gi|73983273		15 kDa		0	1	2	1	4
PREDICTED: barrier-to-autointegration factor isoform 2 [Canis lupus familiaris]	BANF1	gi|73983656		10 kDa		2	1	0	1	4
Cluster of PREDICTED: protein lin-7 homolog C [Canis lupus familiaris] (gi|73988944)	CCDC34	gi|73988944	[2]	22 kDa	TRUE	3	0	1	0	4
Cluster of PREDICTED: developmentally-regulated GTP-binding protein 1 isoform 1 [Canis lupus familiaris] (gi|73995091)	DRG1	gi|73995091		41 kDa	TRUE	2	0	1	1	4
Cluster of PREDICTED: proteasome subunit alpha type-1-like [Canis lupus familiaris] (gi|73999465)	LOC610188	gi|73999465	[3]	36 kDa	TRUE	1	1	1	1	4
PREDICTED: beta-galactoside alpha-2,6-sialyltransferase 1 isoformX1 [Canis lupus familiaris]	ST6GAL1	gi|74003496		46 kDa		0	1	1	2	4
PREDICTED: coagulation factor XIII A chain isoform 1 [Canis lupus familiaris]	F13A1	gi|74003872		83 kDa		1	1	2	0	4
PREDICTED: lupus La protein homolog [Canis lupus familiaris]	SSB	gi|74004835		47 kDa		0	1	1	2	4
Cluster of PREDICTED: signal transducer and activator of transcription 1 isoformX2 [Canis lupus familiaris] (gi|74005006)	STAT1	gi|74005006	[2]	87 kDa	TRUE	1	1	1	1	4
PREDICTED: peptidylprolyl isomerase (cyclophilin)-like 3 isoform 2 [Canis lupus familiaris]	PPIL3	gi|74005127		18 kDa		0	1	1	2	4
PREDICTED: axin interactor, dorsalization-associated protein isoform 2 [Canis lupus familiaris]	AIDA	gi|74006066		35 kDa		1	1	1	1	4
PREDICTED: thiosulfate sulfurtransferase (rhodanese)-like domain containing 1 isoform 2 [Canis lupus familiaris]	TSTD1	gi|74006285		15 kDa		0	1	1	2	4
Cluster of PREDICTED: DNA dC->dU-editing enzyme APOBEC-3A [Canis lupus familiaris] (gi|74012522)	LOC610245	gi|74012522		23 kDa	TRUE	2	0	1	1	4
dual specificity mitogen-activated protein kinase kinase 1 [Canis lupus familiaris]	MAP2K1	gi|114326323		42 kDa	TRUE	1	1	0	1	3
diablo homolog, mitochondrial [Canis lupus familiaris]	DIABLO	gi|119331166	(+1)	27 kDa		1	0	1	1	3
carcinoembryonic antigen-related cell adhesion molecule 25 precursor [Canis lupus familiaris]	CEACAM25	gi|164665418		27 kDa	TRUE	2	0	0	1	3
Cluster of ketosamine-3-kinase [Canis lupus familiaris] (gi|167860154)	FN3KRP	gi|167860154		34 kDa	TRUE	1	1	1	0	3
Cluster of ferritin heavy chain [Canis lupus familiaris] (gi|302393573)	FTH1	gi|302393573	[2]	21 kDa	TRUE	2	0	0	1	3
Cluster of GTP-binding nuclear protein Ran [Canis lupus familiaris] (gi|303228324)	RAN	gi|303228324	[2]	24 kDa	TRUE	1	1	0	1	3
cytochrome c [Canis lupus familiaris]	CYCS	gi|308081835		12 kDa		0	0	2	1	3
lectin, galactoside-binding, soluble, 1 [Canis lupus familiaris]	LGALS1	gi|319918943		15 kDa		2	0	1	0	3
PREDICTED: protein AMBP [Canis lupus familiaris]	AMBP	gi|345777712		39 kDa		0	0	1	2	3
PREDICTED: lamin-B1 isoform X6 [Canis lupus familiaris]	LMNB1	gi|345777955		52 kDa	TRUE	0	0	2	1	3
Cluster of PREDICTED: serine/threonine-protein phosphatase 2A 56 kDa regulatory subunit delta isoform isoformX4 [Canis lupus familiaris] (gi|345778780)	PPP2R5D	gi|345778780	[3]	70 kDa	TRUE	3	0	0	0	3
PREDICTED: guanylate kinase isoformX1 [Canis lupus familiaris]	GUK1	gi|345780040	(+1)	24 kDa		2	1	0	0	3
Cluster of PREDICTED: diphosphoinositol polyphosphate phosphohydrolase 2 isoform X2 [Canis lupus familiaris] (gi|345781051)	NUDT4	gi|345781051		20 kDa	TRUE	1	0	0	2	3
PREDICTED: thiamin pyrophosphokinase 1 isoform X2 [Canis lupus familiaris]	TPK1	gi|345781413		27 kDa		1	0	1	1	3
PREDICTED: splicing factor 3B subunit 4 [Canis lupus familiaris]	SF3B4	gi|345782582		44 kDa		1	1	0	1	3
PREDICTED: sphingomyelin phosphodiesterase, acid-like 3A isoform X2 [Canis lupus familiaris]	SMPDL3A	gi|345784792		51 kDa		0	1	0	2	3
Cluster of PREDICTED: IGF-like family member 3 isoform X4 [Canis lupus familiaris] (gi|345784897)	LOC612207	gi|345784897	[2]	13 kDa	TRUE	0	1	2	0	3
Cluster of PREDICTED: very low-density lipoprotein receptor isoform X2 [Canis lupus familiaris] (gi|345785304)	VLDLR	gi|345785304	[2]	94 kDa	TRUE	0	1	1	1	3
PREDICTED: dermokine [Canis lupus familiaris]	DMKN	gi|345785793		53 kDa		0	2	0	1	3
PREDICTED: autophagy related 7 isoformX3 [Canis lupus familiaris]	ATG7	gi|345786162		78 kDa		1	1	1	0	3
PREDICTED: regulation of nuclear pre-mRNA domain-containing protein 1B [Canis lupus familiaris]	RPRD1B	gi|345790042		37 kDa	TRUE	2	0	1	0	3
PREDICTED: putative 2-oxo-4-hydroxy-4-carboxy-5-ureidoimidazoline decarboxylase [Canis lupus familiaris]	URAD	gi|345790276		20 kDa		1	0	1	1	3
PREDICTED: cat eye syndrome critical region protein 5 [Canis lupus familiaris]	CECR5	gi|345792119		43 kDa		2	0	1	0	3
PREDICTED: delta-1-pyrroline-5-carboxylate dehydrogenase, mitochondrial [Canis lupus familiaris]	ALDH4A1	gi|345793756		62 kDa	TRUE	1	0	1	1	3
PREDICTED: huntingtin-interacting protein K [Canis lupus familiaris]	HYPK	gi|345794870		14 kDa		0	1	1	1	3
PREDICTED: Golgi reassembly-stacking protein 2 [Canis lupus familiaris]	GORASP2	gi|345797117		48 kDa	TRUE	1	0	1	1	3
PREDICTED: semaphorin-4B [Canis lupus familiaris]	SEMA4B	gi|345798045		93 kDa		0	1	1	1	3
PREDICTED: coiled-coil domain-containing protein 6 [Canis lupus familiaris]	CCDC6	gi|345799227		53 kDa	TRUE	2	1	0	0	3
PREDICTED: clathrin interactor 1 isoformX3 [Canis lupus familiaris]	CLINT1	gi|345799449	(+1)	70 kDa		0	1	1	1	3
PREDICTED: LOW QUALITY PROTEIN: tripartite motif-containing protein 29 [Canis lupus familiaris]	TRIM29	gi|345799825		65 kDa		0	1	1	1	3
PREDICTED: cadherin-13 isoform 2 [Canis lupus familiaris]	CDH13	gi|345801062		78 kDa		2	0	0	1	3
PREDICTED: rab GTPase-binding effector protein 2 [Canis lupus familiaris]	RABEP2	gi|345802034		63 kDa	TRUE	0	1	1	1	3
PREDICTED: prostaglandin reductase 2 isoform X2 [Canis lupus familiaris]	PTGR2	gi|345803675		38 kDa		2	0	0	1	3
PREDICTED: E3 ubiquitin/ISG15 ligase TRIM25 [Canis lupus familiaris]	TRIM25	gi|345805248		70 kDa		0	3	0	0	3
PREDICTED: chondroadherin [Canis lupus familiaris]	CHAD	gi|345805552		41 kDa		2	1	0	0	3
PREDICTED: formin-like 1 isoform X4 [Canis lupus familiaris]	FMNL1	gi|345805724		123 kDa	TRUE	1	1	1	0	3
Cluster of PREDICTED: LOW QUALITY PROTEIN: inter-alpha-trypsin inhibitor heavy chain H3 [Canis lupus familiaris] (gi|345806502)	ITIH3	gi|345806502		100 kDa	TRUE	2	0	0	1	3
PREDICTED: renin receptor-like isoform X1 [Canis lupus familiaris]	ATP6AP2	gi|345807054		39 kDa	TRUE	1	1	0	1	3
PREDICTED: heterogeneous nuclear ribonucleoprotein H2 isoformX7 [Canis lupus familiaris]	HNRNPH2	gi|345807788		49 kDa	TRUE	0	1	0	2	3
Cluster of 40S ribosomal protein S4, X isoform [Canis lupus familiaris] (gi|354725914)	RPS4X	gi|354725914	[2]	30 kDa	TRUE	0	1	2	0	3
epididymal secretory protein E1 precursor [Canis lupus familiaris]	NPC2	gi|356582247		16 kDa		0	0	2	1	3
Cluster of cellular nucleic acid-binding protein isoform 1 [Canis lupus familiaris] (gi|356582433)	CNBP	gi|356582433		19 kDa	TRUE	2	0	1	0	3
40S ribosomal protein S24 isoform 2 [Canis lupus familiaris]	L7N0B1	gi|356640167	(+2)	15 kDa	TRUE	0	1	0	2	3
PREDICTED: connective tissue growth factor-like [Canis lupus familiaris]	CTGF	gi|359318472		38 kDa		2	0	1	0	3
Cluster of PREDICTED: kallikrein-13 isoform X1 [Canis lupus familiaris] (gi|359318580)	KLK13	gi|359318580		31 kDa	TRUE	1	0	1	1	3
PREDICTED: glia maturation factor gamma isoformX1 [Canis lupus familiaris]	GMFG	gi|359318666		17 kDa	TRUE	0	1	1	1	3
PREDICTED: protein transport protein Sec23A isoform 2 [Canis lupus familiaris]	SEC23A	gi|359320045		86 kDa	TRUE	2	0	0	1	3
PREDICTED: dihydrolipoyllysine-residue succinyltransferase component of 2-oxoglutarate dehydrogenase complex, mitochondrial [Canis lupus familiaris]	DLST	gi|359320080		49 kDa		2	1	0	0	3
Cluster of PREDICTED: tax1-binding protein 3 isoform 1 [Canis lupus familiaris] (gi|359320319)	TAX1BP3	gi|359320319		14 kDa	TRUE	2	1	0	0	3
PREDICTED: serine/threonine-protein phosphatase 2A activator isoformX2 [Canis lupus familiaris]	PPP2R4	gi|359320499		37 kDa		0	2	0	1	3
Cluster of PREDICTED: DCC-interacting protein 13-beta isoformX1 [Canis lupus familiaris] (gi|359320677)	APPL2	gi|359320677	[2]	75 kDa	TRUE	2	0	0	1	3
PREDICTED: trifunctional enzyme subunit alpha, mitochondrial [Canis lupus familiaris]	HADHA	gi|359321587		83 kDa		0	1	2	0	3
PREDICTED: paralemmin-1 isoform X2 [Canis lupus familiaris]	PALM	gi|359322167		41 kDa	TRUE	0	2	1	0	3
PREDICTED: LOW QUALITY PROTEIN: methylthioribose-1-phosphate isomerase [Canis lupus familiaris]	MRI1	gi|359322226		39 kDa		2	0	0	1	3
Cluster of PREDICTED: tripeptidyl-peptidase 2 isoform X1 [Canis lupus familiaris] (gi|359322512)	TPP2	gi|359322512	[3]	138 kDa	TRUE	1	0	2	0	3
PREDICTED: glycolipid transfer protein [Canis lupus familiaris]	GLTP	gi|359322958		24 kDa		1	0	1	1	3
PREDICTED: glutathione S-transferase omega-1 isoform 1 [Canis lupus familiaris]	GSTO1	gi|359323247		27 kDa	TRUE	0	0	1	2	3
PREDICTED: carbonic anhydrase 13 isoform X3 [Canis lupus familiaris]	CA13	gi|359323321		29 kDa		1	0	1	1	3
high mobility group protein B1 [Canis lupus familiaris]	HMGB1	gi|50950133		25 kDa	TRUE	2	0	0	1	3
trefoil factor 1 precursor [Canis lupus familiaris]	TFF1	gi|50950225		9 kDa		3	0	0	0	3
myotrophin [Canis lupus familiaris]	MTPN	gi|50950227		13 kDa		0	1	1	1	3
Cluster of cAMP-dependent protein kinase catalytic subunit alpha [Canis lupus familiaris] (gi|50978668)	PRKACA	gi|50978668		41 kDa	TRUE	0	0	2	1	3
collagen alpha-1(I) chain precursor [Canis lupus familiaris]	COL1A1	gi|50978774		139 kDa	TRUE	0	1	0	2	3
60S ribosomal protein L23 [Canis lupus familiaris]	rpL17/L23	gi|50978792		15 kDa		0	1	1	1	3
Cluster of guanine nucleotide-binding protein G(I)/G(S)/G(T) subunit beta-1 [Canis lupus familiaris] (gi|50979020)	GNB1	gi|50979020	[2]	37 kDa	TRUE	2	1	0	0	3
Cluster of apolipoprotein C-III precursor [Canis lupus familiaris] (gi|50979230)	APOC3	gi|50979230	[2]	11 kDa	TRUE	1	1	1	0	3
PREDICTED: beta-Ala-His dipeptidase isoform X1 [Canis lupus familiaris]	CNDP1	gi|545485031		57 kDa		0	1	1	1	3
PREDICTED: HD domain-containing protein 2 [Canis lupus familiaris]	HDDC2	gi|545486206		27 kDa		2	0	1	0	3
Cluster of PREDICTED: RAC-beta serine/threonine-protein kinase isoform X5 [Canis lupus familiaris] (gi|545486278)	AKT2	gi|545486278	[3]	63 kDa	TRUE	1	1	0	1	3
Cluster of PREDICTED: semaphorin-4D isoform X3 [Canis lupus familiaris] (gi|545486839)	SEMA4D	gi|545486839	[3]	104 kDa	TRUE	0	1	1	1	3
PREDICTED: apolipoprotein E isoform X5 [Canis lupus familiaris]	APOE	gi|545488191		47 kDa		0	1	2	0	3
Cluster of PREDICTED: 40S ribosomal protein S19 isoform X1 [Canis lupus familiaris] (gi|545488325)	RPS19	gi|545488325	[2]	17 kDa	TRUE	1	0	1	1	3
PREDICTED: LOW QUALITY PROTEIN: carcinoembryonic antigen-related cell adhesion molecule 21 [Canis lupus familiaris]	LOC491477	gi|545489323		49 kDa	TRUE	0	1	0	2	3
PREDICTED: tubulointerstitial nephritis antigen-like 1 [Canis lupus familiaris]	TINAGL1	gi|545491463		52 kDa		0	0	1	2	3
PREDICTED: coatomer subunit zeta-1-like isoform X1 [Canis lupus familiaris]	LOC102155463	gi|545491479		20 kDa		1	0	1	1	3
PREDICTED: tyrosine-protein kinase Fgr isoform X2 [Canis lupus familiaris]	FGR	gi|545491605		59 kDa	TRUE	1	0	2	0	3
PREDICTED: stAR-related lipid transfer protein 5 isoform X1 [Canis lupus familiaris]	STARD5	gi|545493615		24 kDa		1	0	1	1	3
PREDICTED: vacuolar protein sorting-associated protein 26A isoform X1 [Canis lupus familiaris]	VPS26A	gi|545495099		42 kDa		1	0	0	2	3
PREDICTED: Golgi phosphoprotein 3 [Canis lupus familiaris]	GOLPH3	gi|545496465		24 kDa		1	1	1	0	3
PREDICTED: brain acid soluble protein 1 [Canis lupus familiaris]	BASP1	gi|545496492		23 kDa		1	0	2	0	3
PREDICTED: serine protease inhibitor Kazal-type 9 [Canis lupus familiaris]	SPINK9	gi|545496572		11 kDa		1	1	1	0	3
PREDICTED: platelet-activating factor acetylhydrolase IB subunit beta isoform X2 [Canis lupus familiaris]	PAFAH1B2	gi|545497269		26 kDa		0	0	1	2	3
Cluster of PREDICTED: ankyrin repeat and FYVE domain-containing protein 1 isoform X2 [Canis lupus familiaris] (gi|545497634)	ANKFY1	gi|545497634		127 kDa	TRUE	0	1	1	1	3
Cluster of PREDICTED: non-specific lipid-transfer protein isoform X5 [Canis lupus familiaris] (gi|545498787)	SCP2	gi|545498787	[2]	56 kDa	TRUE	3	0	0	0	3
Cluster of PREDICTED: GDH/6PGL endoplasmic bifunctional protein isoform X1 [Canis lupus familiaris] (gi|545499335)	H6PD	gi|545499335	[2]	97 kDa	TRUE	2	0	0	1	3
PREDICTED: eukaryotic translation initiation factor 4H [Canis lupus familiaris]	EIF4H	gi|545500770		33 kDa		0	0	1	2	3
PREDICTED: eukaryotic translation initiation factor 3 subunit B isoform 1 [Canis lupus familiaris]	EIF3B	gi|545501183		92 kDa		1	0	0	2	3
Cluster of PREDICTED: deoxyribonuclease-1 isoform X1 [Canis lupus familiaris] (gi|545501532)	DNASE1	gi|545501532	[2]	41 kDa	TRUE	1	0	1	1	3
Cluster of PREDICTED: leucine carboxyl methyltransferase 1 isoform X2 [Canis lupus familiaris] (gi|545501805)	LCMT1	gi|545501805	[2]	32 kDa	TRUE	1	2	0	0	3
PREDICTED: E3 ubiquitin-protein ligase CHIP [Canis lupus familiaris]	STUB1	gi|545502750		27 kDa		0	1	0	2	3
PREDICTED: mucin-1 isoform X1 [Canis lupus familiaris]	MUC1	gi|545504043	(+1)	79 kDa		2	0	0	1	3
Cluster of PREDICTED: hepatoma-derived growth factor [Canis lupus familiaris] (gi|545505333)	HDGF	gi|545505333		23 kDa	TRUE	1	0	0	2	3
PREDICTED: FERM domain-containing protein 6 isoform X8 [Canis lupus familiaris]	FRMD6	gi|545507340	(+1)	72 kDa		3	0	0	0	3
PREDICTED: glia maturation factor beta isoform X2 [Canis lupus familiaris]	GMFB	gi|545507399		17 kDa	TRUE	1	1	1	0	3
Cluster of PREDICTED: serine/threonine-protein phosphatase 2A 56 kDa regulatory subunit epsilon isoform isoform X3 [Canis lupus familiaris] (gi|545507603)	PPP2R5E	gi|545507603	[2]	54 kDa	TRUE	1	0	1	1	3
PREDICTED: protein farnesyltransferase subunit beta [Canis lupus familiaris]	CHURC1-FNTB	gi|545507675		49 kDa		1	1	1	0	3
PREDICTED: eukaryotic translation initiation factor 2 subunit 1 [Canis lupus familiaris]	EIF2S1	gi|545507741		36 kDa		0	1	1	1	3
PREDICTED: ectonucleoside triphosphate diphosphohydrolase 5 isoform X4 [Canis lupus familiaris]	ENTPD5	gi|545508027		47 kDa		0	1	1	1	3
PREDICTED: BAG family molecular chaperone regulator 5 [Canis lupus familiaris]	BAG5	gi|545508630		51 kDa		1	0	0	2	3
PREDICTED: brain-specific angiogenesis inhibitor 1-associated protein 2 isoform 1 [Canis lupus familiaris]	BAIAP2	gi|545509612		62 kDa		0	1	2	0	3
Cluster of PREDICTED: keratin, type I cytoskeletal 15 isoform X1 [Canis lupus familiaris] (gi|545510125)	KRT15	gi|545510125	[2]	49 kDa	TRUE	0	1	1	1	3
PREDICTED: ras-related protein Rab-5C isoform X1 [Canis lupus familiaris]	RAB5C	gi|545510160		23 kDa	TRUE	0	1	1	1	3
PREDICTED: galectin-9 isoform X1 [Canis lupus familiaris]	LGALS9	gi|545510163		40 kDa		2	0	1	0	3
PREDICTED: 60S ribosomal protein L19 [Canis lupus familiaris]	ribosomal protein L19	gi|545510947		23 kDa		0	1	1	1	3
Cluster of gi|545511298|ref|XP_005624735.1| PREDICTED: c-Jun-amino-terminal kinase-interacting protein 4 isoform X13 [Canis lupus familiaris] (gi|545511298|ref|XP_005624735.1| PREDICTED: c-Jun-amino-terminal kinase-interacting protein 4 isoform X13 [Canis lupus familiaris]-DECOY)	SPAG9	gi|545511298	|ref|XP_005624735.1| PREDICTED: c-Jun-amino-terminal kinase-interacting protein 4 isoform X13 [Canis lupus familiaris]-DECOY [3]	?	TRUE	1	0	1	1	3
Cluster of PREDICTED: lipocalin-15 isoform X3 [Canis lupus familiaris] (gi|545512579)	LCN15	gi|545512579	[2]	23 kDa	TRUE	3	0	0	0	3
Cluster of PREDICTED: serine hydroxymethyltransferase, mitochondrial isoform X5 [Canis lupus familiaris] (gi|545513832)	SHMT2	gi|545513832	[3]	54 kDa	TRUE	1	1	1	0	3
PREDICTED: thiosulfate sulfurtransferase [Canis lupus familiaris]	TST	gi|545514942		41 kDa		1	0	1	1	3
Cluster of PREDICTED: DLA class II histocompatibility antigen, DR-1 beta chain isoform X1 [Canis lupus familiaris] (gi|545518253)	HLA-DRB1	gi|545518253	[2]	33 kDa	TRUE	3	0	0	0	3
Cluster of PREDICTED: casein kinase II subunit beta isoformX1 [Canis lupus familiaris] (gi|545518516)	CSNK2B	gi|545518516	[2]	27 kDa	TRUE	2	1	0	0	3
PREDICTED: LOW QUALITY PROTEIN: ras-related protein Rab-44 [Canis lupus familiaris]	RAB44	gi|545518906		105 kDa		1	0	2	0	3
Cluster of PREDICTED: 2-oxoisovalerate dehydrogenase subunit beta, mitochondrial isoform X1 [Canis lupus familiaris] (gi|545519731)	BCKDHB	gi|545519731	[2]	42 kDa	TRUE	1	1	0	1	3
PREDICTED: mucin-7 [Canis lupus familiaris]	LOC102151383	gi|545521733		21 kDa		2	0	1	0	3
PREDICTED: asparagine synthetase [glutamine-hydrolyzing] isoform X2 [Canis lupus familiaris]	ASNS	gi|545522459		64 kDa	TRUE	0	1	0	2	3
Cluster of PREDICTED: nuclease-sensitive element-binding protein 1-like isoform X1 [Canis lupus familiaris] (gi|545523361)	YBX1	gi|545523361		33 kDa	TRUE	0	1	1	1	3
Cluster of PREDICTED: methionine aminopeptidase 2 isoform X9 [Canis lupus familiaris] (gi|545524496)	METAP2	gi|545524496	[2]	53 kDa	TRUE	0	1	2	0	3
PREDICTED: probable imidazolonepropionase [Canis lupus familiaris]	AMDHD1	gi|545525099		50 kDa		1	0	1	1	3
PREDICTED: bisphosphoglycerate mutase isoform X1 [Canis lupus familiaris]	BPGM	gi|545525542		30 kDa		2	0	0	1	3
Cluster of PREDICTED: rab11 family-interacting protein 1 isoform X3 [Canis lupus familiaris] (gi|545526223)	RAB11FIP1	gi|545526223	[2]	121 kDa	TRUE	2	0	1	0	3
Cluster of PREDICTED: cell growth regulator with EF hand domain protein 1 isoform X1 [Canis lupus familiaris] (gi|545527314)	CGREF1	gi|545527314		34 kDa	TRUE	2	0	0	1	3
Cluster of PREDICTED: nuclear receptor-binding protein isoform X4 [Canis lupus familiaris] (gi|545527370)	NRBP1	gi|545527370		67 kDa	TRUE	2	0	0	1	3
Cluster of PREDICTED: striatin isoform X1 [Canis lupus familiaris] (gi|545527565)	STRN	gi|545527565	[2]	78 kDa	TRUE	1	0	1	1	3
Cluster of PREDICTED: cold shock domain-containing protein E1 isoform X6 [Canis lupus familiaris] (gi|545528446)	CSDE1	gi|545528446	[2]	91 kDa	TRUE	0	0	3	0	3
Cluster of PREDICTED: catenin delta-1 isoformX4 [Canis lupus familiaris] (gi|545530002)	CTNND1	gi|545530002	[2]	107 kDa	TRUE	0	1	1	1	3
Cluster of PREDICTED: lymphocyte-specific protein 1 isoform X1 [Canis lupus familiaris] (gi|545530382)	LSP1	gi|545530382	[3]	46 kDa	TRUE	0	0	2	1	3
PREDICTED: protein phosphatase Slingshot homolog 3 isoform X2 [Canis lupus familiaris]	SSH3	gi|545530589		71 kDa		0	1	1	1	3
PREDICTED: N-acetyllactosaminide beta-1,3-N-acetylglucosaminyltransferase [Canis lupus familiaris]	B3GNT1	gi|545530694		70 kDa		0	1	1	1	3
PREDICTED: transcription factor p65 isoform X2 [Canis lupus familiaris]	RELA	gi|545530794		61 kDa	TRUE	3	0	0	0	3
PREDICTED: 1-phosphatidylinositol 4,5-bisphosphate phosphodiesterase beta-3 isoform X4 [Canis lupus familiaris]	PLCB3	gi|545531019	(+1)	140 kDa	TRUE	0	1	0	2	3
PREDICTED: epidermal growth factor receptor kinase substrate 8-like protein 2 [Canis lupus familiaris]	EPS8L2	gi|545531435		67 kDa		0	0	1	2	3
PREDICTED: plasma protease C1 inhibitor [Canis lupus familiaris]	SERPING1	gi|545531456		48 kDa		0	0	2	1	3
PREDICTED: receptor-type tyrosine-protein phosphatase eta [Canis lupus familiaris]	PTPRJ	gi|545531508		147 kDa		2	0	1	0	3
Cluster of PREDICTED: monoglyceride lipase isoformX1 [Canis lupus familiaris] (gi|545532456)	MGLL	gi|545532456	[2]	37 kDa	TRUE	0	0	1	2	3
PREDICTED: acylamino-acid-releasing enzyme isoform X2 [Canis lupus familiaris]	APEH	gi|545533715	(+1)	83 kDa		1	0	2	0	3
PREDICTED: LOW QUALITY PROTEIN: unconventional myosin-If [Canis lupus familiaris]	MYO1F	gi|545534936		123 kDa	TRUE	0	0	2	1	3
PREDICTED: cdc42-interacting protein 4 isoform X1 [Canis lupus familiaris]	TRIP10	gi|545534959		72 kDa		1	0	0	2	3
PREDICTED: small glutamine-rich tetratricopeptide repeat-containing protein alpha isoform X5 [Canis lupus familiaris]	SGTA	gi|545535300		34 kDa	TRUE	2	1	0	0	3
Cluster of PREDICTED: ester hydrolase C11orf54 homolog isoformX2 [Canis lupus familiaris] (gi|545535979)	C11orf54	gi|545535979	[2]	36 kDa	TRUE	0	1	1	1	3
PREDICTED: ubiquitin carboxyl-terminal hydrolase 47 [Canis lupus familiaris]	USP47	gi|545536825		154 kDa		0	1	0	2	3
PREDICTED: importin subunit alpha-4 [Canis lupus familiaris]	KPNA3	gi|545537328		55 kDa	TRUE	2	1	0	0	3
Cluster of PREDICTED: suppressor of G2 allele of SKP1 homolog isoform X3 [Canis lupus familiaris] (gi|545537567)	SUGT1	gi|545537567	[2]	54 kDa	TRUE	1	0	1	1	3
Cluster of PREDICTED: prostatic acid phosphatase isoform X2 [Canis lupus familiaris] (gi|545538940)	ACPP	gi|545538940	[2]	44 kDa	TRUE	2	0	0	1	3
PREDICTED: destrin [Canis lupus familiaris]	TREES_T100021353	gi|545539840		17 kDa	TRUE	2	1	0	0	3
Cluster of PREDICTED: isocitrate dehydrogenase [NAD] subunit beta, mitochondrial isoform X6 [Canis lupus familiaris] (gi|545540158)	IDH3B	gi|545540158	[3]	43 kDa	TRUE	2	0	0	1	3
Cluster of PREDICTED: matrilin-4 isoform X4 [Canis lupus familiaris] (gi|545540871)	MATN4	gi|545540871	[3]	74 kDa	TRUE	0	0	2	1	3
PREDICTED: leucine-rich repeat flightless-interacting protein 2 [Canis lupus familiaris]	LRRFIP1	gi|545543109		76 kDa	TRUE	0	1	2	0	3
PREDICTED: 60S ribosomal protein L6 [Canis lupus familiaris]	RPL6	gi|545543878		33 kDa		2	0	1	0	3
PREDICTED: tyrosine-protein phosphatase non-receptor type 11 isoform X1 [Canis lupus familiaris]	PTPN11	gi|545543880		68 kDa	TRUE	0	0	2	1	3
PREDICTED: mevalonate kinase isoform X1 [Canis lupus familiaris]	MVK	gi|545544113		43 kDa		1	0	1	1	3
Cluster of PREDICTED: gamma-glutamyltranspeptidase 1 isoform X1 [Canis lupus familiaris] (gi|545544714)	LOC486400	gi|545544714	[2]	70 kDa	TRUE	0	0	1	2	3
Cluster of PREDICTED: eukaryotic translation initiation factor 4B isoform X14 [Canis lupus familiaris] (gi|545545359)	EIF4B	gi|545545359	[2]	70 kDa	TRUE	1	0	1	1	3
Cluster of PREDICTED: branched-chain-amino-acid aminotransferase, cytosolic isoform X2 [Canis lupus familiaris] (gi|545546092)	BCAT1	gi|545546092	[2]	43 kDa	TRUE	1	1	0	1	3
PREDICTED: CD9 antigen [Canis lupus familiaris]	CD9	gi|545547147		25 kDa		0	1	0	2	3
PREDICTED: BAG family molecular chaperone regulator 3 isoform X1 [Canis lupus familiaris]	BAG3	gi|545548127	(+1)	62 kDa		2	1	0	0	3
PREDICTED: COP9 signalosome complex subunit 5 isoform X2 [Canis lupus familiaris]	COPS5	gi|545548789		38 kDa		2	1	0	0	3
PREDICTED: epithelial splicing regulatory protein 1 [Canis lupus familiaris]	ESRP1	gi|545549195		83 kDa	TRUE	3	0	0	0	3
Cluster of PREDICTED: jmjC domain-containing protein 7 isoform X2 [Canis lupus familiaris] (gi|545549214)	JMJD7	gi|545549214	[2]	34 kDa	TRUE	0	0	1	2	3
Cluster of PREDICTED: LOW QUALITY PROTEIN: dual oxidase 2 [Canis lupus familiaris] (gi|545549744)	DUOX2	gi|545549744	[2]	175 kDa	TRUE	0	0	1	2	3
PREDICTED: beta-1,3-galactosyl-O-glycosyl-glycoprotein beta-1,6-N-acetylglucosaminyltransferase 3 [Canis lupus familiaris]	GCNT3	gi|545550053		51 kDa	TRUE	1	2	0	0	3
PREDICTED: beta-secretase 2 [Canis lupus familiaris]	BACE2	gi|545551488		46 kDa		0	2	0	1	3
PREDICTED: LOW QUALITY PROTEIN: transmembrane protease serine 2 [Canis lupus familiaris]	TMPRSS2	gi|545551490		49 kDa	TRUE	0	1	1	1	3
Cluster of PREDICTED: serine/threonine-protein phosphatase 2B catalytic subunit alpha isoform isoform X2 [Canis lupus familiaris] (gi|545551599)	PPP3CA	gi|545551599	[5]	53 kDa	TRUE	0	0	1	2	3
Cluster of PREDICTED: protein transport protein Sec31A isoform X18 [Canis lupus familiaris] (gi|545551810)	SEC31A	gi|545551810	[3]	138 kDa	TRUE	0	0	2	1	3
PREDICTED: LOW QUALITY PROTEIN: rap1 GTPase-GDP dissociation stimulator 1 [Canis lupus familiaris]	RAP1GDS1	gi|545552071		66 kDa	TRUE	1	0	2	0	3
PREDICTED: 60S ribosomal protein L24 [Canis lupus familiaris]	RPL24	gi|545552684		18 kDa		1	1	1	0	3
PREDICTED: importin subunit alpha-3 isoform X1 [Canis lupus familiaris]	KPNA4	gi|545553919		58 kDa	TRUE	3	0	0	0	3
Cluster of PREDICTED: heterogeneous nuclear ribonucleoprotein A3 isoform X12 [Canis lupus familiaris] (gi|545555330)	HNRNPA3	gi|545555330	[2]	40 kDa	TRUE	1	1	1	0	3
PREDICTED: 3-hydroxyisobutyryl-CoA hydrolase, mitochondrial isoform X1 [Canis lupus familiaris]	HIBCH	gi|545555626	(+1)	43 kDa	TRUE	2	0	1	0	3
Cluster of PREDICTED: melanoma inhibitory activity protein 3 isoform X3 [Canis lupus familiaris] (gi|545556750)	MIA3	gi|545556750	[3]	215 kDa	TRUE	0	0	1	2	3
Cluster of PREDICTED: nitrilase homolog 1 isoform X1 [Canis lupus familiaris] (gi|545556882)	NIT1	gi|545556882	[2]	32 kDa	TRUE	3	0	0	0	3
PREDICTED: astrocytic phosphoprotein PEA-15 [Canis lupus familiaris]	PEA15	gi|545556940		15 kDa		1	1	0	1	3
PREDICTED: pirin isoform X1 [Canis lupus familiaris]	PIR	gi|545557510		32 kDa		0	1	0	2	3
Cluster of PREDICTED: glycerol kinase isoform X3 [Canis lupus familiaris] (gi|545557781)	GK	gi|545557781	[2]	63 kDa	TRUE	1	1	0	1	3
Cluster of PREDICTED: ubiquilin-2 isoform X2 [Canis lupus familiaris] (gi|545558262)	UBQLN2	gi|545558262	[2]	59 kDa	TRUE	0	0	1	2	3
PREDICTED: immunoglobulin-binding protein 1 isoform X1 [Canis lupus familiaris]	IGBP1	gi|545558364		39 kDa		0	1	1	1	3
PREDICTED: SH3 domain-binding glutamic acid-rich-like protein isoform X1 [Canis lupus familiaris]	SH3BGRL	gi|545558614		13 kDa		0	1	1	1	3
Cluster of PREDICTED: septin-6 isoform X1 [Canis lupus familiaris] (gi|545559161)	SEPT6	gi|545559161	[2]	51 kDa	TRUE	0	2	1	0	3
Cluster of PREDICTED: lysosome-associated membrane glycoprotein 2 isoform X6 [Canis lupus familiaris] (gi|545559229)	LAMP2	gi|545559229	[2]	45 kDa	TRUE	1	0	1	1	3
Cluster of PREDICTED: LOW QUALITY PROTEIN: transcriptional activator protein Pur-beta [Canis lupus familiaris] (gi|545560279)	H2AFV	gi|545560279		46 kDa	TRUE	2	0	1	0	3
PREDICTED: mucin-7-like [Canis lupus familiaris]	MUC7	gi|545560548		28 kDa	TRUE	0	0	1	2	3
proteasome subunit beta type-7 [Canis lupus familiaris]	PSMB7	gi|548923808		30 kDa		1	0	1	1	3
hepatocyte growth factor-regulated tyrosine kinase substrate isoform 1 [Canis lupus familiaris]	HGS	gi|558695398	(+1)	86 kDa		1	1	0	1	3
PREDICTED: eukaryotic translation initiation factor 3 subunit K isoform 1 [Canis lupus familiaris]	EIF3K	gi|57036583		25 kDa		2	0	1	0	3
PREDICTED: wiskott-Aldrich syndrome protein family member 2 isoformX2 [Canis lupus familiaris]	WASF2	gi|57044069		54 kDa	TRUE	0	1	1	1	3
PREDICTED: cytidine deaminase [Canis lupus familiaris]	CDA	gi|57044256		16 kDa		0	1	1	1	3
PREDICTED: carnitine O-palmitoyltransferase 2, mitochondrial [Canis lupus familiaris]	CPT2	gi|57086811		74 kDa	TRUE	1	0	0	2	3
Cluster of PREDICTED: 60S ribosomal protein L13 isoformX1 [Canis lupus familiaris] (gi|57086947)	RPL13	gi|57086947	[2]	24 kDa	TRUE	2	0	0	1	3
PREDICTED: mitochondrial fission 1 protein [Canis lupus familiaris]	FIS1	gi|57087495		17 kDa		2	0	0	1	3
PREDICTED: serine/threonine-protein phosphatase 4 catalytic subunit isoform 1 [Canis lupus familiaris]	PPP4C	gi|57088343		35 kDa	TRUE	0	0	1	2	3
PREDICTED: acylpyruvase FAHD1, mitochondrial [Canis lupus familiaris]	FAHD1	gi|57088567		25 kDa		1	0	1	1	3
PREDICTED: N(G),N(G)-dimethylarginine dimethylaminohydrolase 1 isoform X3 [Canis lupus familiaris]	DDAH1	gi|57088769		31 kDa		1	1	0	1	3
PREDICTED: interleukin enhancer-binding factor 2 isoform 1 [Canis lupus familiaris]	ILF2	gi|57089135		43 kDa		1	0	2	0	3
PREDICTED: 40S ribosomal protein S26 isoform 1 [Canis lupus familiaris]	RPS26	gi|57092393		13 kDa		1	0	2	0	3
PREDICTED: ribokinase isoform X3 [Canis lupus familiaris]	RBKS	gi|57098211		34 kDa		2	0	0	1	3
PREDICTED: TP53RK-binding protein [Canis lupus familiaris]	TPRKB	gi|57098381		20 kDa		0	1	1	1	3
PREDICTED: RNA-binding protein 8A isoform X2 [Canis lupus familiaris]	RBM8A	gi|57098771		20 kDa		0	1	1	1	3
PREDICTED: apolipoprotein D isoform 1 [Canis lupus familiaris]	APOD	gi|57109608		23 kDa		2	1	0	0	3
PREDICTED: DNA-directed RNA polymerases I, II, and III subunit RPABC3 [Canis lupus familiaris]	POLR2H	gi|57109920		17 kDa		2	1	0	0	3
Cluster of PREDICTED: malignant T-cell-amplified sequence 1 isoform 1 [Canis lupus familiaris] (gi|57112357)	MCTS1	gi|57112357	[2]	21 kDa	TRUE	3	0	0	0	3
ceroid-lipofuscinosis neuronal protein 5 precursor [Canis lupus familiaris]	CLN5	gi|58585232		40 kDa		1	1	1	0	3
F-actin-capping protein subunit alpha-2 [Canis lupus familiaris]	CAPZA2	gi|61316477		33 kDa	TRUE	0	0	2	1	3
Cluster of tissue factor precursor [Canis lupus familiaris] (gi|66864907)	TF	gi|66864907	[2]	33 kDa	TRUE	1	1	1	0	3
PREDICTED: vacuolar protein sorting-associated protein 4B isoformX2 [Canis lupus familiaris]	VPS4B	gi|73945429		49 kDa	TRUE	0	0	1	2	3
Cluster of PREDICTED: syntaxin-7 isoformX5 [Canis lupus familiaris] (gi|73945522)	STX7	gi|73945522		30 kDa	TRUE	1	0	1	1	3
PREDICTED: vacuolar protein sorting-associated protein VTA1 homolog isoform 2 [Canis lupus familiaris]	VTA1	gi|73945621		34 kDa		1	1	0	1	3
PREDICTED: phosphoserine aminotransferase isoform 2 [Canis lupus familiaris]	PSAT1	gi|73946745		40 kDa		1	0	1	1	3
PREDICTED: isochorismatase domain-containing protein 2A, mitochondrial isoformX2 [Canis lupus familiaris]	ISOC2	gi|73946853		22 kDa		1	0	1	1	3
Cluster of PREDICTED: protein arginine N-methyltransferase 1 isoformX1 [Canis lupus familiaris] (gi|73947040)	PRMT1	gi|73947040	[3]	41 kDa	TRUE	3	0	0	0	3
PREDICTED: 2-oxoisovalerate dehydrogenase subunit alpha, mitochondrial isoformX2 [Canis lupus familiaris]	BCKDHA	gi|73947481		51 kDa	TRUE	0	1	0	2	3
Cluster of PREDICTED: abl interactor 1 isoformX11 [Canis lupus familiaris] (gi|73948699)	ABI1	gi|73948699	[4]	52 kDa	TRUE	1	1	1	0	3
PREDICTED: glucosamine-6-phosphate isomerase 1 isoform X2 [Canis lupus familiaris]	GNPDA1	gi|73949474		33 kDa	TRUE	0	1	2	0	3
PREDICTED: nidogen-1 isoform 1 [Canis lupus familiaris]	NID1	gi|73952486		136 kDa		0	0	1	2	3
Cluster of gi|73953994|ref|XP_546206.2| PREDICTED: coagulation factor XII isoform X3 [Canis lupus familiaris] (gi|73953994|ref|XP_546206.2| PREDICTED: coagulation factor XII isoform X3 [Canis lupus familiaris]-DECOY)	F12	gi|73953994|	ref|XP_546206.2| PREDICTED: coagulation factor XII isoform X3 [Canis lupus familiaris]-DECOY [3]	?	TRUE	1	0	2	0	3
PREDICTED: protocadherin Fat 2 [Canis lupus familiaris]	FAT2	gi|73954163		481 kDa		0	1	1	1	3
Cluster of PREDICTED: endothelial cell-specific molecule 1 isoform 2 [Canis lupus familiaris] (gi|73954228)	ESM1	gi|73954228	[2]	20 kDa	TRUE	0	1	1	1	3
PREDICTED: probable ATP-dependent RNA helicase DDX6 isoformX2 [Canis lupus familiaris]	DDX6	gi|73954674		54 kDa		1	0	1	1	3
PREDICTED: coatomer subunit delta isoform 1 [Canis lupus familiaris]	ARCN1	gi|73954685		57 kDa		2	0	1	0	3
PREDICTED: ubiquitin conjugation factor E4 A isoform 2 [Canis lupus familiaris]	UBE4A	gi|73954691		123 kDa		0	0	1	2	3
Cluster of PREDICTED: proteasome subunit beta type-6 isoform X2 [Canis lupus familiaris] (gi|73955410)	PSMB6	gi|73955410	[2]	25 kDa	TRUE	2	0	0	1	3
PREDICTED: splicing factor 3B subunit 3 isoform 1 [Canis lupus familiaris]	SF3B3	gi|73957045		136 kDa		1	0	1	1	3
PREDICTED: mesothelin [Canis lupus familiaris]	MSLN	gi|73959794		45 kDa		0	1	0	2	3
PREDICTED: protein Niban isoform X3 [Canis lupus familiaris]	FAM129A	gi|73961197		104 kDa		0	2	1	0	3
PREDICTED: corticosteroid-binding globulin isoform X2 [Canis lupus familiaris]	SERPINA6	gi|73964415		45 kDa	TRUE	2	1	0	0	3
PREDICTED: cysteine-rich protein 1 [Canis lupus familiaris]	Crip1	gi|73964567		9 kDa		2	0	1	0	3
PREDICTED: envoplakin isoform X4 [Canis lupus familiaris]	EVPL	gi|73965007		231 kDa	TRUE	1	0	2	0	3
Cluster of PREDICTED: vesicle-fusing ATPase isoformX1 [Canis lupus familiaris] (gi|73965153)	NSF	gi|73965153		84 kDa	TRUE	0	0	0	3	3
PREDICTED: pyridoxine-5'-phosphate oxidase [Canis lupus familiaris]	PNPO	gi|73966182		30 kDa		1	1	1	0	3
PREDICTED: vitronectin isoform 2 [Canis lupus familiaris]	VTN	gi|73966959		54 kDa		0	1	1	1	3
PREDICTED: partner of Y14 and mago [Canis lupus familiaris]	PYM1	gi|73968285		23 kDa		1	1	1	0	3
PREDICTED: ras-related protein Rab-5B isoform 1 [Canis lupus familiaris]	RAB5B	gi|73968313		24 kDa	TRUE	0	1	1	1	3
PREDICTED: prenylcysteine oxidase [Canis lupus familiaris]	PCYOX1	gi|73970263		57 kDa		0	1	1	1	3
PREDICTED: protein transport protein Sec24A isoform 2 [Canis lupus familiaris]	SEC24A	gi|73970756		120 kDa	TRUE	1	0	1	1	3
PREDICTED: peptidylprolyl isomerase (cyclophilin)-like 1 isoform 1 [Canis lupus familiaris]	PPIL1	gi|73972724		18 kDa		1	1	0	1	3
PREDICTED: 5'-nucleotidase domain-containing protein 1 [Canis lupus familiaris]	NT5DC1	gi|73974035		53 kDa		1	0	1	1	3
PREDICTED: lymphocyte antigen 6B-like [Canis lupus familiaris]	LOC475113	gi|73974822		13 kDa		0	1	0	2	3
PREDICTED: epiplakin [Canis lupus familiaris]	EPPK1	gi|73974852		321 kDa	TRUE	1	0	0	2	3
PREDICTED: trifunctional enzyme subunit beta, mitochondrial isoformX1 [Canis lupus familiaris]	HADHB	gi|73979871		51 kDa		2	0	1	0	3
PREDICTED: aldose 1-epimerase isoform X3 [Canis lupus familiaris]	GALM	gi|73980750		38 kDa		0	1	1	1	3
Cluster of PREDICTED: acyl-CoA dehydrogenase family member 9, mitochondrial isoformX1 [Canis lupus familiaris] (gi|73984516)	ACAD9	gi|73984516	[2]	69 kDa	TRUE	3	0	0	0	3
PREDICTED: coatomer subunit gamma-1 [Canis lupus familiaris]	COPG1	gi|73984948		98 kDa	TRUE	1	1	0	1	3
PREDICTED: ADP-ribosylation factor-like 8B [Canis lupus familiaris]	ARL8B	gi|73985044		22 kDa		1	1	0	1	3
PREDICTED: pyruvate dehydrogenase E1 component subunit beta, mitochondrial isoformX1 [Canis lupus familiaris]	PDHB	gi|73985153		39 kDa		0	0	2	1	3
PREDICTED: WD repeat-containing protein 82 isoform 4 [Canis lupus familiaris]	WDR82	gi|73985331		35 kDa		0	2	0	1	3
PREDICTED: nuclear receptor 2C2-associated protein [Canis lupus familiaris]	NR2C2AP	gi|73986048		16 kDa		1	1	0	1	3
PREDICTED: multivesicular body subunit 12A [Canis lupus familiaris]	MVB12A	gi|73986216		34 kDa		1	1	1	0	3
Cluster of PREDICTED: polypyrimidine tract-binding protein 1 isoformX1 [Canis lupus familiaris] (gi|73987389)	PTBP1	gi|73987389	[2]	60 kDa	TRUE	2	1	0	0	3
PREDICTED: serine/threonine-protein kinase PAK 1 isoform 1 [Canis lupus familiaris]	PAK1	gi|73987875		61 kDa	TRUE	0	1	0	2	3
PREDICTED: transcription initiation factor TFIID subunit 10 isoform 1 [Canis lupus familiaris]	TAF10	gi|73988322		22 kDa		2	0	0	1	3
Cluster of PREDICTED: propionyl-CoA carboxylase alpha chain, mitochondrial isoformX2 [Canis lupus familiaris] (gi|73989252)	PCCA	gi|73989252		81 kDa	TRUE	0	1	1	1	3
PREDICTED: 60S ribosomal protein L15 isoformX5 [Canis lupus familiaris]	RPL15	gi|73989982		24 kDa		2	0	1	0	3
PREDICTED: myeloid differentiation primary response protein MyD88 isoform 2 [Canis lupus familiaris]	MYD88	gi|73990168		34 kDa	TRUE	2	0	1	0	3
PREDICTED: lambda-crystallin homolog isoformX1 [Canis lupus familiaris]	CRYL1	gi|73993444		35 kDa		2	0	0	1	3
PREDICTED: high mobility group protein B2 isoform 1 [Canis lupus familiaris]	HMGB2	gi|73993609		24 kDa	TRUE	0	0	2	1	3
Cluster of PREDICTED: small nuclear ribonucleoprotein Sm D3 [Canis lupus familiaris] (gi|73995845)	SNRPD3	gi|73995845		14 kDa	TRUE	0	1	1	1	3
Cluster of PREDICTED: keratin, type II cuticular Hb6 [Canis lupus familiaris] (gi|73996559)	KRT7	gi|73996559	[4]	53 kDa	TRUE	3	0	0	0	3
Cluster of PREDICTED: N-acetylgalactosamine kinase isoformX1 [Canis lupus familiaris] (gi|74000059)	GALK2	gi|74000059	[2]	51 kDa	TRUE	0	1	0	2	3
Cluster of PREDICTED: neutral alpha-glucosidase C isoform X5 [Canis lupus familiaris] (gi|74000259)	GANC	gi|74000259	[2]	104 kDa	TRUE	1	0	1	1	3
PREDICTED: sorbitol dehydrogenase [Canis lupus familiaris]	SORD	gi|74000494		38 kDa		1	0	0	2	3
Cluster of PREDICTED: WD repeat-containing protein 44 isoformX2 [Canis lupus familiaris] (gi|74008171)	WDR44	gi|74008171	[2]	100 kDa	TRUE	1	1	0	1	3
proteasome subunit beta type-9 [Canis lupus familiaris]	PSMB9	gi|114326381		22 kDa		1	0	1	0	2
prefoldin subunit 6 [Canis lupus familiaris]	PFDN6	gi|114326395		15 kDa		1	0	0	1	2
alpha-N-acetylgalactosaminide alpha-2,6-sialyltransferase 1 [Canis lupus familiaris]	ST6GalNac1	gi|148232487		67 kDa		1	1	0	0	2
40S ribosomal protein S18 [Canis lupus familiaris]	RPS18	gi|189339186		18 kDa		0	0	1	1	2
adenylate kinase isoenzyme 1 [Canis lupus familiaris]	AK1	gi|196475183	(+1)	23 kDa		2	0	0	0	2
Cluster of catenin beta-1 [Canis lupus familiaris] (gi|212549677)	CTNNB1	gi|212549677	[2]	86 kDa	TRUE	0	1	1	0	2
chloride intracellular channel protein 2 [Canis lupus familiaris]	CLIC2	gi|304376324		28 kDa	TRUE	1	1	0	0	2
Cluster of keratin, type II cytoskeletal 71 [Canis lupus familiaris] (gi|308081611)	KRT71	gi|308081611	[2]	57 kDa	TRUE	1	0	1	0	2
pancreatic secretory granule membrane major glycoprotein GP2 precursor [Canis lupus familiaris]	GP2	gi|341865609		58 kDa		1	0	0	1	2
PREDICTED: rho GTPase-activating protein 9 [Canis lupus familiaris]	ARHGAP9	gi|345776434		82 kDa	TRUE	1	0	1	0	2
PREDICTED: LOW QUALITY PROTEIN: gamma-parvin [Canis lupus familiaris]	PARVG	gi|345776744		38 kDa		1	1	0	0	2
PREDICTED: FK506-binding protein 15 isoform X4 [Canis lupus familiaris]	FKBP15	gi|345777702		132 kDa	TRUE	2	0	0	0	2
PREDICTED: core histone macro-H2A.1 isoformX2 [Canis lupus familiaris]	H2AFY	gi|345778038	(+1)	40 kDa	TRUE	0	1	1	0	2
Cluster of PREDICTED: heterogeneous nuclear ribonucleoprotein Q isoformX3 [Canis lupus familiaris] (gi|345778171)	SYNCRIP	gi|345778171	[2]	70 kDa	TRUE	0	0	1	1	2
PREDICTED: U6 snRNA-associated Sm-like protein LSm6 isoform 1 [Canis lupus familiaris]	LSM6	gi|345781168		9 kDa		2	0	0	0	2
PREDICTED: anionic trypsin [Canis lupus familiaris]	P06872	gi|345781255		26 kDa	TRUE	1	0	1	0	2
PREDICTED: LOW QUALITY PROTEIN: protocadherin Fat 1 [Canis lupus familiaris]	FAT1	gi|345781801		507 kDa	TRUE	2	0	0	0	2
PREDICTED: calpain-14 [Canis lupus familiaris]	CAPN14	gi|345782168		78 kDa		0	0	1	1	2
PREDICTED: EH domain-containing protein 3 [Canis lupus familiaris]	EHD3	gi|345782170		61 kDa	TRUE	0	0	0	2	2
Cluster of PREDICTED: hippocalcin-like 1 isoform X3 [Canis lupus familiaris] (gi|345782368)	HPCAL1	gi|345782368		22 kDa	TRUE	2	0	0	0	2
Cluster of PREDICTED: transmembrane protein 132A isoform X4 [Canis lupus familiaris] (gi|345783309)	TMEM132A	gi|345783309	[2]	110 kDa	TRUE	1	0	1	0	2
PREDICTED: MOB kinase activator 2 isoform X3 [Canis lupus familiaris]	MOB2	gi|345783986	(+2)	30 kDa		0	1	0	1	2
PREDICTED: DNA replication licensing factor MCM6 [Canis lupus familiaris]	MCM6	gi|345784242		93 kDa	TRUE	2	0	0	0	2
Cluster of PREDICTED: protein Smaug homolog 2 isoform X1 [Canis lupus familiaris] (gi|345785051)	SAMD4B	gi|345785051	[2]	76 kDa	TRUE	0	0	1	1	2
PREDICTED: cell adhesion molecule 4 [Canis lupus familiaris]	CADM4	gi|345785675		43 kDa		1	0	0	1	2
PREDICTED: isoleucine--tRNA ligase, cytoplasmic isoform X2 [Canis lupus familiaris]	IARS	gi|345785870		144 kDa		0	0	1	1	2
PREDICTED: 60S ribosomal protein L13a isoform X1 [Canis lupus familiaris]	Rpl13A	gi|345786084		24 kDa	TRUE	2	0	0	0	2
Cluster of PREDICTED: galactoside 3(4)-L-fucosyltransferase-like [Canis lupus familiaris] (gi|345786697)	LOC100683739	gi|345786697		45 kDa	TRUE	1	0	1	0	2
PREDICTED: 60S ribosomal protein L36 [Canis lupus familiaris]	RPL36	gi|345786707		12 kDa	TRUE	1	0	1	0	2
PREDICTED: LOW QUALITY PROTEIN: MAP kinase-activated protein kinase 3 [Canis lupus familiaris]	MAPKAPK3	gi|345787061		43 kDa	TRUE	0	0	1	1	2
PREDICTED: LOW QUALITY PROTEIN: microtubule-associated protein 4 isoform 1 [Canis lupus familiaris]	MAP4	gi|345787491		120 kDa		0	0	1	1	2
PREDICTED: cysteine and histidine-rich domain-containing protein 1 isoform 2 [Canis lupus familiaris]	CHORDC1	gi|345787901		37 kDa		1	0	0	1	2
Cluster of PREDICTED: lysosome-associated membrane glycoprotein 1 isoform X2 [Canis lupus familiaris] (gi|345788825)	LAMP1	gi|345788825	[3]	45 kDa	TRUE	1	0	0	1	2
PREDICTED: LOW QUALITY PROTEIN: pentraxin-related protein PTX3 [Canis lupus familiaris]	PTX3	gi|345789394		37 kDa		0	0	1	1	2
PREDICTED: proliferating cell nuclear antigen [Canis lupus familiaris]	PCNA	gi|345789675		29 kDa		2	0	0	0	2
PREDICTED: LOW QUALITY PROTEIN: putative hydrolase RBBP9 [Canis lupus familiaris]	RBBP9	gi|345790120		21 kDa		0	0	1	1	2
PREDICTED: LOW QUALITY PROTEIN: probable aminopeptidase NPEPL1 [Canis lupus familiaris]	NPEPL1	gi|345790233		56 kDa		0	1	0	1	2
PREDICTED: malectin isoform 2 [Canis lupus familiaris]	MLEC	gi|345790954		32 kDa	TRUE	1	0	1	0	2
PREDICTED: protein phosphatase 1F [Canis lupus familiaris]	PPM1F	gi|345791452		48 kDa		2	0	0	0	2
Cluster of PREDICTED: keratin, type II cytoskeletal 3-like isoform 1 [Canis lupus familiaris] (gi|345791833)	KRT3	gi|345791833	[3]	63 kDa	TRUE	2	0	0	0	2
PREDICTED: LOW QUALITY PROTEIN: importin-8 isoform 4 [Canis lupus familiaris]	IPO8	gi|345792263		120 kDa	TRUE	2	0	0	0	2
Cluster of gi|345792890|ref|XP_003433680.1| PREDICTED: transforming acidic coiled-coil-containing protein 2 isoformX1 [Canis lupus familiaris] (gi|345792890|ref|XP_003433680.1| PREDICTED: transforming acidic coiled-coil-containing protein 2 isoformX1 [Canis lupus familiaris]-DECOY)	TACC2	gi|345792890	|ref|XP_003433680.1| PREDICTED: transforming acidic coiled-coil-containing protein 2 isoformX1 [Canis lupus familiaris]-DECOY [6]	?	TRUE	1	0	1	0	2
PREDICTED: brefeldin A-inhibited guanine nucleotide-exchange protein 1 isoform 4 [Canis lupus familiaris]	ARFGEF1	gi|345793099		209 kDa	TRUE	1	0	1	0	2
Cluster of PREDICTED: regulator of microtubule dynamics protein 1 isoform X3 [Canis lupus familiaris] (gi|345793179)	FAM82B	gi|345793179	[2]	36 kDa	TRUE	1	0	0	1	2
PREDICTED: copine-3 [Canis lupus familiaris]	CPNE3	gi|345793181		60 kDa	TRUE	2	0	0	0	2
PREDICTED: calcium/calmodulin-dependent protein kinase type 1D isoform X2 [Canis lupus familiaris]	CAMK1D	gi|345793621		43 kDa	TRUE	1	0	0	1	2
PREDICTED: complement C1q subcomponent subunit C isoform 1 [Canis lupus familiaris]	C1QC	gi|345793701		26 kDa		2	0	0	0	2
PREDICTED: annexin A3 isoform X3 [Canis lupus familiaris]	ANXA3	gi|345795635		36 kDa	TRUE	2	0	0	0	2
PREDICTED: uridine 5'-monophosphate synthase [Canis lupus familiaris]	UMPS	gi|345796106		52 kDa		2	0	0	0	2
Cluster of PREDICTED: disks large homolog 1 isoformX3 [Canis lupus familiaris] (gi|345796152)	DLG1	gi|345796152	[2]	89 kDa	TRUE	0	1	0	1	2
PREDICTED: LOW QUALITY PROTEIN: 26S proteasome non-ATPase regulatory subunit 14 isoform 4 [Canis lupus familiaris]	PSMD14	gi|345797261		38 kDa		1	0	1	0	2
PREDICTED: NADH-ubiquinone oxidoreductase 75 kDa subunit, mitochondrial isoform X2 [Canis lupus familiaris]	NDUFS1	gi|345797448	(+1)	76 kDa		0	0	1	1	2
PREDICTED: apolipoprotein A-II [Canis lupus familiaris]	APOA2	gi|345797840		11 kDa		2	0	0	0	2
PREDICTED: isoleucine--tRNA ligase, mitochondrial, partial [Canis lupus familiaris]	IARS2	gi|345797961		108 kDa		2	0	0	0	2
PREDICTED: protein S100-P [Canis lupus familiaris]	S100P	gi|345798353		11 kDa		1	0	1	0	2
PREDICTED: LOW QUALITY PROTEIN: polyadenylate-binding protein-interacting protein 1 isoform 5 [Canis lupus familiaris]	PAIP1	gi|345799593		53 kDa	TRUE	0	0	1	1	2
PREDICTED: trafficking protein particle complex subunit 4 isoform 2 [Canis lupus familiaris]	TRAPPC4	gi|345799856		24 kDa		1	0	1	0	2
PREDICTED: vacuolar protein sorting-associated protein 26B, partial [Canis lupus familiaris]	VPS26B	gi|345800033		36 kDa		0	0	1	1	2
PREDICTED: signal recognition particle receptor subunit alpha-like [Canis lupus familiaris]	SRPRA	gi|345800040		70 kDa		0	0	1	1	2
Cluster of PREDICTED: agrin isoformX1 [Canis lupus familiaris] (gi|345800594)	AGRN	gi|345800594		217 kDa	TRUE	2	0	0	0	2
Cluster of PREDICTED: AP-1 complex subunit sigma-1A [Canis lupus familiaris] (gi|345801195)	AP1S1	gi|345801195		19 kDa	TRUE	1	0	1	0	2
PREDICTED: LOW QUALITY PROTEIN: putative N-acetylglucosamine-6-phosphate deacetylase [Canis lupus familiaris]	AMDHD2	gi|345802401		48 kDa		2	0	0	0	2
PREDICTED: ubiquilin-4 [Canis lupus familiaris]	UBQLN4	gi|345802593		64 kDa	TRUE	0	0	2	0	2
PREDICTED: interferon regulatory factor 6 isoform X2 [Canis lupus familiaris]	IRF6	gi|345803084		53 kDa		0	1	0	1	2
PREDICTED: fibulin-5 [Canis lupus familiaris]	FBLN5	gi|345803531		50 kDa		1	0	1	0	2
PREDICTED: serine/threonine-protein kinase Nek9 isoform 2 [Canis lupus familiaris]	NEK9	gi|345803705		107 kDa		0	1	0	1	2
PREDICTED: thioredoxin-related transmembrane protein 1 [Canis lupus familiaris]	TMX1	gi|345804359		32 kDa		1	0	1	0	2
PREDICTED: LOW QUALITY PROTEIN: ubiquitin-conjugating enzyme E2 O [Canis lupus familiaris]	UBE2O	gi|345804589		141 kDa		0	1	0	1	2
PREDICTED: phosphatidylinositol transfer protein alpha isoform [Canis lupus familiaris]	PITPNA	gi|345805028		32 kDa	TRUE	0	1	0	1	2
PREDICTED: carbonic anhydrase 4 isoform X2 [Canis lupus familiaris]	CA4	gi|345805694		35 kDa		2	0	0	0	2
PREDICTED: LOW QUALITY PROTEIN: GTPase-activating protein and VPS9 domain-containing protein 1 isoform 1 [Canis lupus familiaris]	GAPVD1	gi|345806077		166 kDa		1	1	0	0	2
60S ribosomal protein L18 [Canis lupus familiaris]	RPL18	gi|354459064		22 kDa		0	0	0	2	2
Cluster of 40S ribosomal protein S6 [Canis lupus familiaris] (gi|356460872)	RPS6	gi|356460872		29 kDa	TRUE	0	1	0	1	2
Cluster of THUMP domain containing 3 [Canis lupus familiaris] (gi|356460886)	THUMPD3	gi|356460886	[2]	56 kDa	TRUE	2	0	0	0	2
60S ribosomal protein L7 [Canis lupus familiaris]	RPL7	gi|356582337		29 kDa		2	0	0	0	2
RNA polymerase II subunit A C-terminal domain phosphatase SSU72 [Canis lupus familiaris]	SSU72	gi|356640183		23 kDa	TRUE	0	0	1	1	2
diphosphoinositol polyphosphate phosphohydrolase 1 [Canis lupus familiaris]	NUDT3	gi|356991189		19 kDa	TRUE	1	0	1	0	2
60S ribosomal protein L14 [Canis lupus familiaris]	RPL14	gi|356991221		23 kDa		0	1	1	0	2
small nuclear ribonucleoprotein Sm D2 [Canis lupus familiaris]	SNRPD2	gi|356991224		14 kDa		2	0	0	0	2
dynein light chain roadblock-type 1 [Canis lupus familiaris]	DYNLRB1	gi|356991238		11 kDa		1	0	0	1	2
Cluster of PREDICTED: protein transport protein Sec24C isoformX1 [Canis lupus familiaris] (gi|359319306)	SEC24C	gi|359319306		119 kDa	TRUE	0	1	1	0	2
PREDICTED: ganglioside GM2 activator [Canis lupus familiaris]	GM2A	gi|359319344		22 kDa		1	0	1	0	2
PREDICTED: complement component C8 alpha chain [Canis lupus familiaris]	C8A	gi|359319377		66 kDa		2	0	0	0	2
PREDICTED: heat shock factor-binding protein 1 isoform X1 [Canis lupus familiaris]	HSBP1	gi|359319569		8 kDa		0	1	0	1	2
PREDICTED: coactosin-like protein, partial [Canis lupus familiaris]	COTL1	gi|359319594		14 kDa		1	0	1	0	2
PREDICTED: hematological and neurological expressed 1-like protein [Canis lupus familiaris]	HN1L	gi|359319808		20 kDa		1	0	0	1	2
PREDICTED: plakophilin-1-like [Canis lupus familiaris]	LOC100855871	gi|359319865		81 kDa		0	0	1	1	2
PREDICTED: torsin-1B [Canis lupus familiaris]	TOR1B	gi|359320466		38 kDa		1	0	1	0	2
PREDICTED: RAB21, member RAS oncogene family, partial [Canis lupus familiaris]	RAB21	gi|359320530		24 kDa		1	0	0	1	2
Cluster of PREDICTED: DENN domain-containing protein 4C isoform X1 [Canis lupus familiaris] (gi|359320808)	DENND4C	gi|359320808	[2]	212 kDa	TRUE	2	0	0	0	2
PREDICTED: polypeptide N-acetylgalactosaminyltransferase 12 [Canis lupus familiaris]	GALNT12	gi|359320847		67 kDa		0	0	0	2	2
PREDICTED: deoxycytidylate deaminase isoform 1 [Canis lupus familiaris]	DCTD	gi|359321528		19 kDa		0	0	1	1	2
PREDICTED: mannose-1-phosphate guanyltransferase beta [Canis lupus familiaris]	GMPPB	gi|359322274		40 kDa		1	0	1	0	2
Cluster of PREDICTED: proteasomal ubiquitin receptor ADRM1 isoform X1 [Canis lupus familiaris] (gi|359322645)	ADRM1	gi|359322645		42 kDa	TRUE	0	0	1	1	2
PREDICTED: ubiquitin fusion degradation protein 1 homolog [Canis lupus familiaris]	UFD1L	gi|359323018		34 kDa	TRUE	1	0	0	1	2
PREDICTED: keratin, type II cytoskeletal 8 [Canis lupus familiaris]	KRT8	gi|359323093		55 kDa	TRUE	2	0	0	0	2
PREDICTED: isovaleryl-CoA dehydrogenase, mitochondrial isoform 1 [Canis lupus familiaris]	IVD	gi|359323395		46 kDa		1	0	0	1	2
PREDICTED: lanosterol synthase isoform 2 [Canis lupus familiaris]	LSS	gi|359323612		83 kDa		1	0	0	1	2
PREDICTED: alcohol dehydrogenase E chain-like [Canis lupus familiaris]	LOC100856533	gi|359323653		40 kDa	TRUE	0	0	1	1	2
PREDICTED: LOW QUALITY PROTEIN: T-complex protein 1 subunit epsilon isoform 1 [Canis lupus familiaris]	CCT5	gi|359323746		60 kDa		2	0	0	0	2
PREDICTED: rho GTPase-activating protein 4 isoformX1 [Canis lupus familiaris]	ARHGAP4	gi|359324251		106 kDa		2	0	0	0	2
thioredoxin-dependent peroxide reductase, mitochondrial [Canis lupus familiaris]	PRDX3	gi|374532808		28 kDa		1	0	1	0	2
uromodulin precursor [Canis lupus familiaris]	Umod	gi|50950249		70 kDa		0	0	1	1	2
alpha-lactalbumin precursor [Canis lupus familiaris]	LALBA	gi|50978848		16 kDa	TRUE	1	1	0	0	2
retinal rod rhodopsin-sensitive cGMP 3',5'-cyclic phosphodiesterase subunit delta [Canis lupus familiaris]	PDE6D	gi|50978888		17 kDa		0	1	0	1	2
ribosome-binding protein 1 [Canis lupus familiaris]	RRBP1	gi|50978924		165 kDa		2	0	0	0	2
vesicular integral-membrane protein VIP36 precursor [Canis lupus familiaris]	LMAN2	gi|50979058		40 kDa		0	1	0	1	2
Cluster of methylosome subunit pICln [Canis lupus familiaris] (gi|50979100)	CLNS1A	gi|50979100		26 kDa	TRUE	1	0	1	0	2
ras-related protein Rab-5A [Canis lupus familiaris]	RAB5A	gi|50979150		24 kDa	TRUE	0	0	1	1	2
Cluster of PREDICTED: SAM and SH3 domain-containing protein 1 isoform X3 [Canis lupus familiaris] (gi|545485601)	SASH1	gi|545485601		138 kDa	TRUE	2	0	0	0	2
Cluster of gi|545485837|ref|XP_005615632.1| PREDICTED: afadin isoform X2 [Canis lupus familiaris] (gi|545485837|ref|XP_005615632.1| PREDICTED: afadin isoform X2 [Canis lupus familiaris]-DECOY)	MLLT4	gi|545485837	|ref|XP_005615632.1| PREDICTED: afadin isoform X2 [Canis lupus familiaris]-DECOY [2]	?	TRUE	1	1	0	0	2
Cluster of PREDICTED: tight junction protein ZO-2 isoform X10 [Canis lupus familiaris] (gi|545486239)	TJP2	gi|545486239	[4]	118 kDa	TRUE	0	1	1	0	2
PREDICTED: kallikrein-5 isoform X2 [Canis lupus familiaris]	KLK5	gi|545486316		32 kDa	TRUE	2	0	0	0	2
PREDICTED: osteoclast-stimulating factor 1 [Canis lupus familiaris]	OSTF1	gi|545486547		19 kDa		0	1	1	0	2
PREDICTED: serine palmitoyltransferase 1 isoform X2 [Canis lupus familiaris]	SPTLC1	gi|545486810		52 kDa		1	0	1	0	2
Cluster of PREDICTED: hsp70-binding protein 1 isoform X4 [Canis lupus familiaris] (gi|545487433)	HSPBP1	gi|545487433	[2]	39 kDa	TRUE	1	0	1	0	2
Cluster of PREDICTED: poliovirus receptor-related protein 2 isoform X3 [Canis lupus familiaris] (gi|545488199)	PVRL2	gi|545488199		52 kDa	TRUE	2	0	0	0	2
PREDICTED: pleckstrin homology-like domain, family B, member 3 isoform X1 [Canis lupus familiaris]	PHLDB3	gi|545488291		72 kDa		2	0	0	0	2
Cluster of PREDICTED: sodium/potassium-transporting ATPase subunit alpha-3 [Canis lupus familiaris] (gi|545488337)	ATP1A3	gi|545488337	[4]	113 kDa	TRUE	0	0	2	0	2
PREDICTED: galectin-7 [Canis lupus familiaris]	LOC100855989	gi|545488611		21 kDa		0	0	0	2	2
PREDICTED: tubulin-folding cofactor B [Canis lupus familiaris]	TBCB	gi|545488789		39 kDa		0	0	1	1	2
PREDICTED: major allergen I polypeptide chain 2-like [Canis lupus familiaris]	LOC102153923	gi|545488947		12 kDa		0	0	1	1	2
PREDICTED: 60S ribosomal protein L11 isoform X1 [Canis lupus familiaris]	RPL11	gi|545490182		22 kDa		2	0	0	0	2
Cluster of PREDICTED: ADP-ribosylation factor-like 2 binding protein isoform X1 [Canis lupus familiaris] (gi|545491064)	ARL2BP	gi|545491064	[2]	19 kDa	TRUE	1	1	0	0	2
Cluster of PREDICTED: eukaryotic translation initiation factor 4 gamma 3 isoform X7 [Canis lupus familiaris] (gi|545491994)	EIF4G3	gi|545491994	[4]	187 kDa	TRUE	1	1	0	0	2
Cluster of PREDICTED: Rho guanine nucleotide exchange factor (GEF) 10-like isoform X11 [Canis lupus familiaris] (gi|545492276)	ARHGEF10L	gi|545492276	[3]	116 kDa	TRUE	0	1	1	0	2
Cluster of PREDICTED: adaptin ear-binding coat-associated protein 2 isoform X3 [Canis lupus familiaris] (gi|545492287)	NECAP2	gi|545492287		30 kDa	TRUE	1	0	0	1	2
PREDICTED: regulatory solute carrier protein family 1 member 1 isoform X1 [Canis lupus familiaris]	LOC487429	gi|545492329		110 kDa	TRUE	1	0	0	1	2
Cluster of PREDICTED: F-box only protein 6 [Canis lupus familiaris] (gi|545492429)	FBXO6	gi|545492429		36 kDa	TRUE	1	0	1	0	2
PREDICTED: TAR DNA-binding protein 43 isoform X1 [Canis lupus familiaris]	TARDBP	gi|545492450		64 kDa		0	0	1	1	2
PREDICTED: endoplasmic reticulum aminopeptidase 1 isoform X1 [Canis lupus familiaris]	ERAP1	gi|545492666		107 kDa		0	1	1	0	2
Cluster of PREDICTED: 40S ribosomal protein S23 [Canis lupus familiaris] (gi|545492869)	RPS23	gi|545492869	[2]	16 kDa	TRUE	1	0	1	0	2
PREDICTED: ectoderm-neural cortex protein 2 isoform X2 [Canis lupus familiaris]	KLHL25	gi|545493403		66 kDa		0	0	1	1	2
Cluster of PREDICTED: alpha-L-iduronidase isoform X1 [Canis lupus familiaris] (gi|545494346)	IDUA	gi|545494346	[2]	73 kDa	TRUE	1	0	1	0	2
PREDICTED: ERO1-like protein beta isoform X1 [Canis lupus familiaris]	ERO1B	gi|545494649		52 kDa	TRUE	0	0	1	1	2
PREDICTED: polypeptide N-acetylgalactosaminyltransferase 2 [Canis lupus familiaris]	GALNT2	gi|545494763		63 kDa	TRUE	1	0	0	1	2
PREDICTED: nucleophosmin isoform X1 [Canis lupus familiaris]	NPM1	gi|545494864		30 kDa	TRUE	2	0	0	0	2
Cluster of PREDICTED: probable E3 ubiquitin-protein ligase HERC4 isoform X10 [Canis lupus familiaris] (gi|545495042)	HERC4	gi|545495042	[5]	90 kDa	TRUE	0	1	0	1	2
Cluster of PREDICTED: heterogeneous nuclear ribonucleoprotein H3 isoform X5 [Canis lupus familiaris] (gi|545495061)	HNRPH3	gi|545495061	[2]	35 kDa	TRUE	0	0	1	1	2
PREDICTED: pterin-4-alpha-carbinolamine dehydratase [Canis lupus familiaris]	PCBD1	gi|545495166		12 kDa		1	0	1	0	2
PREDICTED: nudC domain-containing protein 2 [Canis lupus familiaris]	NUDCD2	gi|545495867		21 kDa		2	0	0	0	2
PREDICTED: complement component C9 [Canis lupus familiaris]	C9	gi|545496317		64 kDa		2	0	0	0	2
Cluster of PREDICTED: amyloid beta (A4) precursor-like protein 2 isoform X2 [Canis lupus familiaris] (gi|545496784)	APLP2	gi|545496784	[2]	85 kDa	TRUE	0	1	1	0	2
PREDICTED: protein LZIC isoform X1 [Canis lupus familiaris]	LZIC	gi|545499408	(+1)	24 kDa		0	0	1	1	2
Cluster of PREDICTED: L-fucose kinase isoform X7 [Canis lupus familiaris] (gi|545499947)	FUK	gi|545499947	[3]	121 kDa	TRUE	0	0	1	1	2
PREDICTED: tumor necrosis factor receptor type 1-associated DEATH domain protein isoform X1 [Canis lupus familiaris]	TRADD	gi|545500325		36 kDa		0	1	0	1	2
PREDICTED: mitotic spindle-associated MMXD complex subunit MIP18 [Canis lupus familiaris]	FAM96B	gi|545500343		18 kDa		1	0	1	0	2
PREDICTED: cytoplasmic dynein 1 light intermediate chain 2, partial [Canis lupus familiaris]	DYNC1LI2	gi|545500431		51 kDa	TRUE	1	0	0	1	2
Cluster of PREDICTED: sulfatase-modifying factor 2 isoform X1 [Canis lupus familiaris] (gi|545500491)	SUMF2	gi|545500491	[2]	32 kDa	TRUE	0	0	0	2	2
PREDICTED: AP-4 complex subunit mu-1 isoform X2 [Canis lupus familiaris]	AP4M1	gi|545500909		48 kDa		2	0	0	0	2
PREDICTED: hydroxyacylglutathione hydrolase-like isoform X1 [Canis lupus familiaris]	HAGHL	gi|545501566		31 kDa		2	0	0	0	2
Cluster of PREDICTED: eukaryotic peptide chain release factor GTP-binding subunit ERF3A isoform X3 [Canis lupus familiaris] (gi|545502164)	GSPT1	gi|545502164		56 kDa	TRUE	0	0	1	1	2
PREDICTED: phosphomannomutase 2 isoform X2 [Canis lupus familiaris]	PMM2	gi|545502245		28 kDa	TRUE	0	1	0	1	2
Cluster of PREDICTED: 40S ribosomal protein S2 isoform X1 [Canis lupus familiaris] (gi|545502625)	RPS2	gi|545502625	[2]	31 kDa	TRUE	0	0	2	0	2
PREDICTED: SUMO-conjugating enzyme UBC9-B isoform X2 [Canis lupus familiaris]	UBE2I	gi|545502709	(+1)	21 kDa		1	0	1	0	2
Cluster of PREDICTED: AMP deaminase 2 isoform X1 [Canis lupus familiaris] (gi|545502937)	AMPD2	gi|545502937		93 kDa	TRUE	1	0	0	1	2
PREDICTED: uncharacterized protein LOC479873 isoform 1 [Canis lupus familiaris]	LOC479873	gi|545503692		26 kDa		1	0	1	0	2
PREDICTED: medium-chain specific acyl-CoA dehydrogenase, mitochondrial [Canis lupus familiaris]	ACADM	gi|545503811		48 kDa		0	0	0	2	2
PREDICTED: importin-9, partial [Canis lupus familiaris]	IPO9	gi|545503963		114 kDa		0	0	1	1	2
PREDICTED: neutrophil cytosol factor 2 isoform X1 [Canis lupus familiaris]	NCF2	gi|545504059		59 kDa	TRUE	0	0	1	1	2
PREDICTED: 2-5A-dependent ribonuclease isoform X1 [Canis lupus familiaris]	RNASEL	gi|545504103		83 kDa		0	0	1	1	2
PREDICTED: 6-phosphofructo-2-kinase/fructose-2,6-bisphosphatase 2 isoform X5 [Canis lupus familiaris]	PFKFB2	gi|545504237		60 kDa	TRUE	2	0	0	0	2
PREDICTED: capZ-interacting protein [Canis lupus familiaris]	RCSD1	gi|545504973		41 kDa		1	0	1	0	2
PREDICTED: FAD synthase isoform X1 [Canis lupus familiaris]	FLAD1	gi|545505572		54 kDa		1	0	0	1	2
Cluster of gi|545507032|ref|XP_005623351.1| PREDICTED: striatin-3 isoform X1 [Canis lupus familiaris] (gi|545507032|ref|XP_005623351.1| PREDICTED: striatin-3 isoform X1 [Canis lupus familiaris]-DECOY)	STRN3	gi|545507032	|ref|XP_005623351.1| PREDICTED: striatin-3 isoform X1 [Canis lupus familiaris]-DECOY [2]	?	TRUE	1	0	1	0	2
PREDICTED: V-type proton ATPase subunit D isoform 1 [Canis lupus familiaris]	ATP6V1D	gi|545507739		43 kDa		0	1	1	0	2
PREDICTED: lysosomal alpha-glucosidase isoform X1 [Canis lupus familiaris]	GAA	gi|545509157		109 kDa		0	1	1	0	2
Cluster of PREDICTED: phosphatidylinositol 5-phosphate 4-kinase type-2 beta isoform X1 [Canis lupus familiaris] (gi|545510968)	PIP4K2B	gi|545510968	[2]	45 kDa	TRUE	0	0	2	0	2
PREDICTED: LOW QUALITY PROTEIN: active breakpoint cluster region-related protein isoform 1 [Canis lupus familiaris]	ABR	gi|545512059		135 kDa		1	1	0	0	2
Cluster of PREDICTED: clustered mitochondria protein homolog isoform X2 [Canis lupus familiaris] (gi|545512203)	CLUH	gi|545512203	[2]	166 kDa	TRUE	2	0	0	0	2
PREDICTED: kynurenine--oxoglutarate transaminase 1 isoform X1 [Canis lupus familiaris]	CCBL1	gi|545513059		61 kDa		1	0	1	0	2
PREDICTED: phosphatidylinositol 5-phosphate 4-kinase type-2 gamma [Canis lupus familiaris]	PIP4K2C	gi|545514173		48 kDa		1	0	1	0	2
PREDICTED: N-acetylglucosamine-6-sulfatase, partial [Canis lupus familiaris]	GNS	gi|545514187		59 kDa		0	0	1	1	2
Cluster of PREDICTED: fibulin-1 isoform X2 [Canis lupus familiaris] (gi|545514461)	FBLN1	gi|545514461	[2]	75 kDa	TRUE	2	0	0	0	2
Cluster of PREDICTED: 3-mercaptopyruvate sulfurtransferase isoform X1 [Canis lupus familiaris] (gi|545514939)	MPST	gi|545514939		33 kDa	TRUE	1	0	1	0	2
Cluster of PREDICTED: reversion-inducing cysteine-rich protein with Kazal motifs isoform X3 [Canis lupus familiaris] (gi|545516352)	RECK	gi|545516352	[2]	96 kDa	TRUE	1	1	0	0	2
PREDICTED: protein PRRC1 isoform X2 [Canis lupus familiaris]	PRRC1	gi|545516630		47 kDa		1	0	0	1	2
Cluster of PREDICTED: dynactin subunit 3 isoform X2 [Canis lupus familiaris] (gi|545517387)	DCTN3	gi|545517387	[2]	20 kDa	TRUE	2	0	0	0	2
PREDICTED: histidine triad nucleotide-binding protein 2, mitochondrial [Canis lupus familiaris]	HINT2	gi|545517557		22 kDa		0	0	0	2	2
PREDICTED: golgi-associated plant pathogenesis-related protein 1 [Canis lupus familiaris]	GLIPR2	gi|545517565		17 kDa		1	1	0	0	2
PREDICTED: endoplasmic reticulum resident protein 44 [Canis lupus familiaris]	ERP44	gi|545518135		52 kDa	TRUE	1	0	1	0	2
PREDICTED: proteasome subunit beta type-8 isoform X1 [Canis lupus familiaris]	PSMB8	gi|545518255		30 kDa		1	0	0	1	2
PREDICTED: 60S ribosomal protein L10a isoform X1 [Canis lupus familiaris]	Rpl10a	gi|545518272		25 kDa		2	0	0	0	2
Cluster of PREDICTED: ectonucleotide pyrophosphatase/phosphodiesterase family member 3 isoform X2 [Canis lupus familiaris] (gi|545518353)	ENPP3	gi|545518353	[2]	100 kDa	TRUE	0	0	0	2	2
PREDICTED: hydroxysteroid (17-beta) dehydrogenase 8 isoform X3 [Canis lupus familiaris]	HSD17B8	gi|545518677	(+1)	35 kDa		2	0	0	0	2
PREDICTED: molybdenum cofactor biosynthesis protein 1-like [Canis lupus familiaris]	LOC102151350	gi|545518970		26 kDa		2	0	0	0	2
PREDICTED: glutathione S-transferase-like isoform X2 [Canis lupus familiaris]	LOC481841	gi|545519462		30 kDa	TRUE	0	0	0	2	2
PREDICTED: glutathione S-transferase A4-like isoform X4 [Canis lupus familiaris]	LOC610304	gi|545519471		26 kDa	TRUE	1	0	1	0	2
Cluster of PREDICTED: ras-related GTP-binding protein D [Canis lupus familiaris] (gi|545520337)	RRAGD	gi|545520337	[3]	51 kDa	TRUE	2	0	0	0	2
PREDICTED: ribonuclease UK114 isoform 1 [Canis lupus familiaris]	HRSP12	gi|545520428		22 kDa	TRUE	2	0	0	0	2
PREDICTED: gasdermin-D isoform X4 [Canis lupus familiaris]	GSDMD	gi|545521104		56 kDa		0	1	1	0	2
PREDICTED: protein FAM83H isoform X2 [Canis lupus familiaris]	FAM83H	gi|545521134		148 kDa		0	0	0	2	2
PREDICTED: transmembrane protease serine 11E [Canis lupus familiaris]	TMPRSS11E	gi|545521681		48 kDa	TRUE	0	1	0	1	2
Cluster of PREDICTED: protein RUFY3 isoform X6 [Canis lupus familiaris] (gi|545521741)	RUFY3	gi|545521741	[2]	71 kDa	TRUE	1	0	1	0	2
Cluster of PREDICTED: coatomer subunit gamma-2 isoform X4 [Canis lupus familiaris] (gi|545522011)	COPG2	gi|545522011	[3]	102 kDa	TRUE	0	1	0	1	2
Cluster of PREDICTED: putative adenosylhomocysteinase 3 isoform X5 [Canis lupus familiaris] (gi|545522073)	AHCYL2	gi|545522073	[2]	67 kDa	TRUE	1	0	1	0	2
PREDICTED: uncharacterized protein C1orf50 [Canis lupus familiaris]	C1orf50	gi|545523354		24 kDa		0	0	1	1	2
Cluster of PREDICTED: trafficking protein particle complex subunit 3 isoform X2 [Canis lupus familiaris] (gi|545523640)	TRAPPC3	gi|545523640		19 kDa	TRUE	1	0	0	1	2
PREDICTED: KIAA0319-like ortholog [Canis lupus familiaris]	KIAA0319L	gi|545525018		123 kDa		0	1	0	1	2
PREDICTED: splicing factor, proline- and glutamine-rich [Canis lupus familiaris]	SFPQ	gi|545525020		71 kDa		1	1	0	0	2
Cluster of PREDICTED: glutathione S-transferase kappa 1 isoform X2 [Canis lupus familiaris] (gi|545525326)	GSTK1	gi|545525326		26 kDa	TRUE	0	0	1	1	2
PREDICTED: protein Hook homolog 3 isoform X1 [Canis lupus familiaris]	HOOK3	gi|545526007		83 kDa	TRUE	0	0	1	1	2
Cluster of PREDICTED: glutaminyl-peptide cyclotransferase isoform X1 [Canis lupus familiaris] (gi|545527602)	QPCT	gi|545527602	[2]	41 kDa	TRUE	1	0	1	0	2
PREDICTED: STAM-binding protein isoform X2 [Canis lupus familiaris]	STAMBP	gi|545528193		48 kDa		2	0	0	0	2
PREDICTED: cornifin-A-like [Canis lupus familiaris]	LOC100685649	gi|545529005		10 kDa		0	1	0	1	2
PREDICTED: cornifin-A-like isoform X2 [Canis lupus familiaris]	LOC100685726	gi|545529007		12 kDa		1	0	0	1	2
PREDICTED: ras-related protein Ral-A isoform X2 [Canis lupus familiaris]	RALA	gi|545529283		24 kDa	TRUE	0	1	0	1	2
PREDICTED: methylthioribulose-1-phosphate dehydratase [Canis lupus familiaris]	APIP	gi|545529795		33 kDa		2	0	0	0	2
PREDICTED: CD59 glycoprotein isoform X3 [Canis lupus familiaris]	CD59	gi|545529835		14 kDa		1	0	0	1	2
Cluster of PREDICTED: cytoskeleton-associated protein 5 isoform X5 [Canis lupus familiaris] (gi|545530215)	CKAP5	gi|545530215	[2]	225 kDa	TRUE	2	0	0	0	2
PREDICTED: EF-hand calcium-binding domain-containing protein 4A isoform X2 [Canis lupus familiaris]	EFCAB4A	gi|545530334		47 kDa	TRUE	2	0	0	0	2
Cluster of PREDICTED: cathepsin F isoform X2 [Canis lupus familiaris] (gi|545530659)	CTSF	gi|545530659		53 kDa	TRUE	0	0	1	1	2
PREDICTED: 4F2 cell-surface antigen heavy chain [Canis lupus familiaris]	SLC3A2	gi|545531146		59 kDa		0	0	1	1	2
PREDICTED: plakophilin-3, partial [Canis lupus familiaris]	PKP3	gi|545531425		81 kDa		0	1	0	1	2
PREDICTED: reticulocalbin-1 [Canis lupus familiaris]	RCN1	gi|545531443		38 kDa		2	0	0	0	2
PREDICTED: N-alpha-acetyltransferase 15, NatA auxiliary subunit [Canis lupus familiaris]	NAA15	gi|545531644		95 kDa	TRUE	0	0	1	1	2
PREDICTED: LOW QUALITY PROTEIN: tubulin monoglycylase TTLL3 [Canis lupus familiaris]	TTLL3	gi|545532775		98 kDa		0	0	1	1	2
Cluster of PREDICTED: bis(5'-adenosyl)-triphosphatase isoform X6 [Canis lupus familiaris] (gi|545533072)	FHIT	gi|545533072		15 kDa	TRUE	1	1	0	0	2
PREDICTED: hyaluronidase-2 isoform X2 [Canis lupus familiaris]	HYAL2	gi|545533642		53 kDa		1	0	1	0	2
PREDICTED: serine protease inhibitor Kazal-type 8 isoform X1 [Canis lupus familiaris]	SPINK8	gi|545533870		13 kDa		2	0	0	0	2
PREDICTED: armadillo repeat-containing protein 6 isoform X1 [Canis lupus familiaris]	ARMC6	gi|545534080		51 kDa		0	0	1	1	2
PREDICTED: UV excision repair protein RAD23 homolog A isoform X2 [Canis lupus familiaris]	RAD23A	gi|545534506	(+1)	40 kDa	TRUE	2	0	0	0	2
PREDICTED: ras-related protein Rab-3D isoform X1 [Canis lupus familiaris]	RAB3D	gi|545534649		24 kDa	TRUE	1	0	0	1	2
Cluster of PREDICTED: heterogeneous nuclear ribonucleoprotein M isoform X4 [Canis lupus familiaris] (gi|545534918)	HNRNPM	gi|545534918	[4]	80 kDa	TRUE	0	0	1	1	2
PREDICTED: LOW QUALITY PROTEIN: far upstream element-binding protein 2 [Canis lupus familiaris]	KHSRP	gi|545535671		72 kDa	TRUE	1	0	1	0	2
Cluster of PREDICTED: AMP deaminase 3 isoform X2 [Canis lupus familiaris] (gi|545536804)	AMPD3	gi|545536804	[2]	90 kDa	TRUE	0	0	2	0	2
Cluster of PREDICTED: ubiquitin-conjugating enzyme E2 variant 3 isoform X1 [Canis lupus familiaris] (gi|545536997)	UEVLD	gi|545536997	[3]	54 kDa	TRUE	1	0	0	1	2
PREDICTED: 60S acidic ribosomal protein P1-like [Canis lupus familiaris]	LOC102156895	gi|545537126		8 kDa		1	0	0	1	2
Cluster of gi|545537686|ref|XP_005634033.1| PREDICTED: LIM domain only protein 7 isoform X2 [Canis lupus familiaris] (gi|545537686|ref|XP_005634033.1| PREDICTED: LIM domain only protein 7 isoform X2 [Canis lupus familiaris]-DECOY)	LMO7	gi|545537686	|ref|XP_005634033.1| PREDICTED: LIM domain only protein 7 isoform X2 [Canis lupus familiaris]-DECOY	?	TRUE	2	0	0	0	2
Cluster of PREDICTED: sciellin isoform X8 [Canis lupus familiaris] (gi|545537741)	SCEL	gi|545537741	[2]	76 kDa	TRUE	2	0	0	0	2
PREDICTED: dnaJ homolog subfamily C member 3 [Canis lupus familiaris]	DNAJC3	gi|545537816		55 kDa		0	0	1	1	2
Cluster of gi|545537910|ref|XP_005634113.1| PREDICTED: heterogeneous nuclear ribonucleoprotein D-like [Canis lupus familiaris] (gi|545537910|ref|XP_005634113.1| PREDICTED: heterogeneous nuclear ribonucleoprotein D-like [Canis lupus familiaris]-DECOY)	LOC102155805	gi|545537910	|ref|XP_005634113.1| PREDICTED: heterogeneous nuclear ribonucleoprotein D-like [Canis lupus familiaris]-DECOY [2]	?	TRUE	1	0	0	1	2
Cluster of PREDICTED: serine/threonine-protein phosphatase 6 regulatory ankyrin repeat subunit A isoform X3 [Canis lupus familiaris] (gi|545538837)	ANKRD28	gi|545538837		117 kDa	TRUE	2	0	0	0	2
PREDICTED: propionyl-CoA carboxylase beta chain, mitochondrial [Canis lupus familiaris]	PCCB	gi|545539043		60 kDa		0	0	1	1	2
PREDICTED: sodium/potassium-transporting ATPase subunit beta-3, partial [Canis lupus familiaris]	ATP1B3	gi|545539571		30 kDa		2	0	0	0	2
PREDICTED: LOW QUALITY PROTEIN: phospholipid scramblase 1 [Canis lupus familiaris]	LOC611500	gi|545539576		39 kDa		1	0	0	1	2
PREDICTED: dolichyl-diphosphooligosaccharide--protein glycosyltransferase subunit 2 isoform X4 [Canis lupus familiaris]	RPN2	gi|545540620		71 kDa		0	1	1	0	2
PREDICTED: sorting nexin-21 isoform X1 [Canis lupus familiaris]	SNX21	gi|545540916		40 kDa		0	1	0	1	2
Cluster of PREDICTED: sister chromatid cohesion protein PDS5 homolog B isoform X2 [Canis lupus familiaris] (gi|545541818)	PDS5B	gi|545541818	[2]	164 kDa	TRUE	2	0	0	0	2
PREDICTED: ubiquitin-like 3 [Canis lupus familiaris]	UBL3	gi|545541874		13 kDa		1	0	0	1	2
Cluster of PREDICTED: myotubularin-related protein 9 isoform X2 [Canis lupus familiaris] (gi|545542314)	MTMR9	gi|545542314		54 kDa	TRUE	2	0	0	0	2
Cluster of PREDICTED: DBIRD complex subunit KIAA1967 homolog isoform X3 [Canis lupus familiaris] (gi|545542486)	CCAR2	gi|545542486	[2]	102 kDa	TRUE	1	1	0	0	2
PREDICTED: COP9 signalosome complex subunit 7b isoform X3 [Canis lupus familiaris]	COPS7B	gi|545542854		30 kDa		1	0	0	1	2
PREDICTED: EF-hand domain-containing protein D1, partial [Canis lupus familiaris]	EFHD1	gi|545542881		16 kDa	TRUE	0	1	0	1	2
PREDICTED: cysteine protease ATG4B, partial [Canis lupus familiaris]	ATG4B	gi|545543249		51 kDa		1	0	0	1	2
PREDICTED: LOW QUALITY PROTEIN: density-regulated protein [Canis lupus familiaris]	DENR	gi|545543631		35 kDa		2	0	0	0	2
PREDICTED: huntingtin-interacting protein 1-related protein [Canis lupus familiaris]	HIP1R	gi|545544604		120 kDa	TRUE	0	1	1	0	2
Cluster of PREDICTED: COP9 signalosome complex subunit 7a isoform X3 [Canis lupus familiaris] (gi|545546562)	COPS7A	gi|545546562	[2]	30 kDa	TRUE	1	0	0	1	2
Cluster of PREDICTED: MMS19 nucleotide excision repair protein homolog isoform X2 [Canis lupus familiaris] (gi|545547558)	MMS19	gi|545547558	[2]	113 kDa	TRUE	1	0	1	0	2
PREDICTED: SEC23-interacting protein isoform X2 [Canis lupus familiaris]	SEC23IP	gi|545548131		112 kDa	TRUE	1	0	0	1	2
PREDICTED: mitotic checkpoint protein BUB3 isoform X4 [Canis lupus familiaris]	BUB3	gi|545548225	(+1)	28 kDa		1	0	1	0	2
PREDICTED: PDZ and LIM domain protein 1 [Canis lupus familiaris]	PDLIM1	gi|545548354		56 kDa	TRUE	1	1	0	0	2
Cluster of PREDICTED: uncharacterized protein LOC100684514 [Canis lupus familiaris] (gi|545548410)	LOC100684514	gi|545548410	[2]	97 kDa	TRUE	2	0	0	0	2
Cluster of PREDICTED: transcription elongation factor A protein 1 isoform X3 [Canis lupus familiaris] (gi|545548639)	TCEA1	gi|545548639	[3]	32 kDa	TRUE	2	0	0	0	2
PREDICTED: tyrosine-protein kinase Lyn isoform X2 [Canis lupus familiaris]	LYN	gi|545548667	(+1)	56 kDa	TRUE	0	0	2	0	2
Cluster of PREDICTED: formin-1 isoform X1 [Canis lupus familiaris] (gi|545549267)	FMN1	gi|545549267		174 kDa	TRUE	2	0	0	0	2
Cluster of PREDICTED: 60S acidic ribosomal protein P1 [Canis lupus familiaris] (gi|545550702)	RPLP1	gi|545550702		8 kDa	TRUE	0	0	2	0	2
PREDICTED: neuroplastin [Canis lupus familiaris]	NPTN	gi|545550716		46 kDa		2	0	0	0	2
PREDICTED: ubiquitin carboxyl-terminal hydrolase 25 isoform 2 [Canis lupus familiaris]	USP25	gi|545550849		130 kDa	TRUE	2	0	0	0	2
PREDICTED: pyridoxal kinase [Canis lupus familiaris]	PDXK	gi|545551384		38 kDa		1	0	1	0	2
PREDICTED: serine/arginine repetitive matrix protein 3 [Canis lupus familiaris]	CSTB	gi|545551502		49 kDa		0	0	0	2	2
Cluster of PREDICTED: aminoacyl tRNA synthase complex-interacting multifunctional protein 1 isoform X2 [Canis lupus familiaris] (gi|545552186)	AIMP1	gi|545552186	[2]	34 kDa	TRUE	0	0	1	1	2
PREDICTED: bifunctional 3'-phosphoadenosine 5'-phosphosulfate synthase 1 isoform 2 [Canis lupus familiaris]	PAPSS1	gi|545552192		75 kDa	TRUE	2	0	0	0	2
Cluster of PREDICTED: transferrin receptor protein 1 isoform X1 [Canis lupus familiaris] (gi|545552729)	TFRC	gi|545552729	[2]	88 kDa	TRUE	0	1	1	0	2
Cluster of PREDICTED: CD47 antigen isoform X1 [Canis lupus familiaris] (gi|545552745)	CD47	gi|545552745		35 kDa	TRUE	1	1	0	0	2
PREDICTED: limbic system-associated membrane protein isoform X2 [Canis lupus familiaris]	LSAMP	gi|545552922		40 kDa		1	0	0	1	2
PREDICTED: methionine synthase reductase isoform X2 [Canis lupus familiaris]	MTRR	gi|545553386		78 kDa		0	0	1	1	2
Cluster of PREDICTED: lipoma-preferred partner isoform X6 [Canis lupus familiaris] (gi|545553805)	LPP	gi|545553805		55 kDa	TRUE	0	0	1	1	2
PREDICTED: thiopurine S-methyltransferase isoform X2 [Canis lupus familiaris]	TPMT	gi|545554167		28 kDa		2	0	0	0	2
PREDICTED: protein phosphatase 1 regulatory subunit 11 isoform X2 [Canis lupus familiaris]	PPP1R11	gi|545554754		13 kDa		0	1	1	0	2
Cluster of PREDICTED: COBL-like 1 isoform X1 [Canis lupus familiaris] (gi|545555047)	COBLL1	gi|545555047	[2]	128 kDa	TRUE	0	0	1	1	2
Cluster of PREDICTED: cytoplasmic dynein 1 intermediate chain 2 isoform X6 [Canis lupus familiaris] (gi|545555191)	DYNC1I2	gi|545555191	[2]	71 kDa	TRUE	2	0	0	0	2
Cluster of PREDICTED: serine/threonine-protein phosphatase 6 regulatory ankyrin repeat subunit B isoform X3 [Canis lupus familiaris] (gi|545555725)	ANKRD44	gi|545555725	[2]	118 kDa	TRUE	0	1	1	0	2
Cluster of gi|545556057|ref|XP_005640657.1| PREDICTED: ribulose-phosphate 3-epimerase isoform X7 [Canis lupus familiaris] (gi|545556057|ref|XP_005640657.1| PREDICTED: ribulose-phosphate 3-epimerase isoform X7 [Canis lupus familiaris]-DECOY)	RPE	gi|545556057	|ref|XP_005640657.1| PREDICTED: ribulose-phosphate 3-epimerase isoform X7 [Canis lupus familiaris]-DECOY [2]	?	TRUE	0	1	1	0	2
Cluster of PREDICTED: mannose-1-phosphate guanyltransferase alpha isoform X15 [Canis lupus familiaris] (gi|545556352)	GMPPA	gi|545556352		46 kDa	TRUE	0	1	0	1	2
PREDICTED: BRO1 domain-containing protein BROX isoform X2 [Canis lupus familiaris]	BROX	gi|545556760		46 kDa		0	0	1	1	2
PREDICTED: C-reactive protein [Canis lupus familiaris]	CRP	gi|545556971		28 kDa		1	0	1	0	2
PREDICTED: regucalcin isoform X1 [Canis lupus familiaris]	RGN	gi|545557930		33 kDa		0	2	0	0	2
Cluster of PREDICTED: ras-related GTP-binding protein B isoform X4 [Canis lupus familiaris] (gi|545558253)	RRAGB	gi|545558253	[2]	40 kDa	TRUE	1	0	1	0	2
Cluster of PREDICTED: fragile X mental retardation protein 1 isoform X20 [Canis lupus familiaris] (gi|545559604)	FMR1	gi|545559604		68 kDa	TRUE	1	0	1	0	2
PREDICTED: proteolipid protein 2 [Canis lupus familiaris]	PLP2	gi|545560056		17 kDa		0	1	1	0	2
Cluster of PREDICTED: peptidyl-prolyl cis-trans isomerase NIMA-interacting 4 [Canis lupus familiaris] (gi|545560080)	PIN4	gi|545560080	[3]	17 kDa	TRUE	1	0	1	0	2
Cluster of PREDICTED: 2-oxoglutarate dehydrogenase, mitochondrial isoform X2 [Canis lupus familiaris] (gi|545560283)	OGDH	gi|545560283	[2]	91 kDa	TRUE	1	0	1	0	2
Cluster of PREDICTED: rho guanine nucleotide exchange factor 1-like, partial [Canis lupus familiaris] (gi|545560824)	LOC100856005	gi|545560824		104 kDa	TRUE	0	0	2	0	2
Cluster of ras-related protein Rab-4B [Canis lupus familiaris] (gi|54792729)	RAB4B	gi|54792729		24 kDa	TRUE	1	0	1	0	2
Cluster of gi|548923719|ref|NP_001271389.1| serine protease HTRA2, mitochondrial [Canis lupus familiaris] (gi|548923719|ref|NP_001271389.1| serine protease HTRA2, mitochondrial [Canis lupus familiaris]-DECOY)	HTRA2	gi|548923719	|ref|NP_001271389.1| serine protease HTRA2, mitochondrial [Canis lupus familiaris]-DECOY [2]	?	TRUE	1	0	0	1	2
serine/threonine-protein kinase 38-like [Canis lupus familiaris]	STK38L	gi|548923810		54 kDa	TRUE	2	0	0	0	2
protein S100-A4 [Canis lupus familiaris]	S100A4	gi|55741496		12 kDa	TRUE	0	0	0	2	2
sodium/glucose cotransporter 1 [Canis lupus familiaris]	SLC5A1	gi|55741754		73 kDa	TRUE	2	0	0	0	2
vacuolar protein sorting-associated protein 29 isoform 2 [Canis lupus familiaris]	Vps29	gi|558515889	(+1)	20 kDa		2	0	0	0	2
60S ribosomal protein L7a [Canis lupus familiaris]	RPL7A	gi|558611350		30 kDa		0	0	0	2	2
AP-3 complex subunit mu-1 [Canis lupus familiaris]	AP3M1	gi|560186527		47 kDa	TRUE	2	0	0	0	2
PREDICTED: 26S proteasome non-ATPase regulatory subunit 8 [Canis lupus familiaris]	PSMD8	gi|57036591		40 kDa		1	0	1	0	2
PREDICTED: gigaxonin isoform X3 [Canis lupus familiaris]	GAN	gi|57087273		68 kDa		1	0	1	0	2
PREDICTED: methylosome protein 50 isoform 1 [Canis lupus familiaris]	WDR77	gi|57088141		37 kDa	TRUE	2	0	0	0	2
Cluster of PREDICTED: peptidyl-prolyl cis-trans isomerase FKBP3 isoformX1 [Canis lupus familiaris] (gi|57090119)	FKBP3	gi|57090119		25 kDa	TRUE	1	0	1	0	2
PREDICTED: SPRY domain-containing protein 4 [Canis lupus familiaris]	SPRYD4	gi|57092549		23 kDa		1	0	0	1	2
PREDICTED: bis(5'-nucleosyl)-tetraphosphatase [asymmetrical] isoform X3 [Canis lupus familiaris]	NUDT2	gi|57093665		17 kDa		0	1	1	0	2
PREDICTED: apolipoprotein M isoform X3 [Canis lupus familiaris]	APOM	gi|57094349		21 kDa		2	0	0	0	2
PREDICTED: eukaryotic translation initiation factor 3 subunit H isoform 1 [Canis lupus familiaris]	EIF3H	gi|57095314		40 kDa		0	0	2	0	2
PREDICTED: pyrroline-5-carboxylate reductase 3 [Canis lupus familiaris]	PYCRL	gi|57095680		30 kDa		0	1	0	1	2
PREDICTED: anterior gradient protein 2 homolog isoformX2 [Canis lupus familiaris]	AGR2	gi|57096374		20 kDa		2	0	0	0	2
PREDICTED: lumican [Canis lupus familiaris]	LUM	gi|57097203		38 kDa		1	1	0	0	2
PREDICTED: protein FAM98A [Canis lupus familiaris]	FAM98A	gi|57098233		55 kDa		2	0	0	0	2
Cluster of PREDICTED: annexin A5 [Canis lupus familiaris] (gi|57100553)	ANXA5	gi|57100553	[2]	36 kDa	TRUE	1	0	1	0	2
PREDICTED: UDP-GlcNAc:betaGal beta-1,3-N-acetylglucosaminyltransferase 3 [Canis lupus familiaris]	B3GNT3	gi|57101758		42 kDa	TRUE	2	0	0	0	2
PREDICTED: N-alpha-acetyltransferase 25, NatB auxiliary subunit isoform 1 [Canis lupus familiaris]	NAA25	gi|57105852		112 kDa	TRUE	2	0	0	0	2
PREDICTED: keratin, type I cytoskeletal 18 isoform 1 [Canis lupus familiaris]	KRT18	gi|57106334		48 kDa	TRUE	1	1	0	0	2
PREDICTED: ADP-ribose pyrophosphatase, mitochondrial [Canis lupus familiaris]	NUDT9	gi|57109118		39 kDa	TRUE	0	0	2	0	2
PREDICTED: programmed cell death protein 10 isoform 1 [Canis lupus familiaris]	Pdcd10	gi|57110102		25 kDa		0	0	2	0	2
elafin precursor [Canis lupus familiaris]	PI3	gi|587651908		11 kDa		1	1	0	0	2
Cluster of MHC class II DR alpha chain precursor [Canis lupus familiaris] (gi|58801551)	DLA	gi|58801551		29 kDa	TRUE	1	0	0	1	2
tripeptidyl-peptidase 1 precursor [Canis lupus familiaris]	TPP1	gi|62078829		61 kDa		0	1	0	1	2
keratin, type I cytoskeletal 9 [Canis lupus familiaris]	KRT9	gi|62122767		76 kDa	TRUE	2	0	0	0	2
nucleoside diphosphate kinase B [Canis lupus familiaris]	NME2	gi|66864901		17 kDa	TRUE	0	0	1	1	2
PREDICTED: electron transfer flavoprotein subunit beta isoform 1 [Canis lupus familiaris]	ETFB	gi|73946970		28 kDa		2	0	0	0	2
PREDICTED: protein bicaudal D homolog 2 isoform X2 [Canis lupus familiaris]	BICD2	gi|73947197		95 kDa	TRUE	1	0	0	1	2
PREDICTED: kallikrein-12 isoform X2 [Canis lupus familiaris]	KLK12	gi|73947851		29 kDa		0	0	1	1	2
PREDICTED: protein FAM188A [Canis lupus familiaris]	FAM188A	gi|73949020		54 kDa		1	0	0	1	2
PREDICTED: ADP-sugar pyrophosphatase isoform 1 [Canis lupus familiaris]	NUDT5	gi|73949060		24 kDa		1	0	0	1	2
PREDICTED: T-cell immunomodulatory protein isoform 2 [Canis lupus familiaris]	ITFG1	gi|73949891		68 kDa		0	0	1	1	2
Cluster of PREDICTED: protein archease isoformX1 [Canis lupus familiaris] (gi|73949962)	ZBTB8OS	gi|73949962	[2]	21 kDa	TRUE	1	0	1	0	2
PREDICTED: ATPase inhibitor, mitochondrial isoformX2 [Canis lupus familiaris]	ATPIF1	gi|73950105		12 kDa		2	0	0	0	2
PREDICTED: transmembrane protein 222 isoform 2 [Canis lupus familiaris]	TMEM222	gi|73950133		23 kDa		2	0	0	0	2
PREDICTED: anamorsin [Canis lupus familiaris]	CIAPIN1	gi|73950355		34 kDa		1	0	0	1	2
PREDICTED: WD repeat-containing protein 61 isoform 1 [Canis lupus familiaris]	WDR61	gi|73951322		34 kDa		1	0	0	1	2
PREDICTED: interferon-stimulated gene 20 kDa protein [Canis lupus familiaris]	ISG20	gi|73951438		19 kDa	TRUE	1	0	1	0	2
PREDICTED: huntingtin [Canis lupus familiaris]	HTT	gi|73951765		346 kDa	TRUE	1	0	1	0	2
PREDICTED: ADP-ribosyl cyclase 2 [Canis lupus familiaris]	BST1	gi|73951823		35 kDa		1	0	1	0	2
PREDICTED: clathrin light chain B isoform 5 [Canis lupus familiaris]	CLTB	gi|73953337		23 kDa	TRUE	1	1	0	0	2
PREDICTED: arginine--tRNA ligase, cytoplasmic isoform 1 [Canis lupus familiaris]	RARS	gi|73953488		76 kDa		1	0	0	1	2
PREDICTED: alpha-methylacyl-CoA racemase isoform X2 [Canis lupus familiaris]	AMACR	gi|73954345		42 kDa		2	0	0	0	2
PREDICTED: yorkie homolog [Canis lupus familiaris]	YAP1	gi|73955238		50 kDa	TRUE	1	0	0	1	2
PREDICTED: arachidonate 12-lipoxygenase, 12S-type isoform 1 [Canis lupus familiaris]	ALOX12	gi|73955347		75 kDa		1	0	0	1	2
PREDICTED: tripartite motif-containing protein 16 [Canis lupus familiaris]	TRIM16	gi|73956072		62 kDa		0	0	1	1	2
PREDICTED: protein DJ-1 isoform 6 [Canis lupus familiaris]	PARK7	gi|73956706		20 kDa		1	0	0	1	2
PREDICTED: diphosphomevalonate decarboxylase [Canis lupus familiaris]	MVD	gi|73956933		44 kDa		1	0	0	1	2
PREDICTED: transmembrane protein 79 [Canis lupus familiaris]	TMEM79	gi|73961565		44 kDa		2	0	0	0	2
PREDICTED: actin-related protein 10 isoform 2 [Canis lupus familiaris]	ACTR10	gi|73963028		46 kDa		2	0	0	0	2
PREDICTED: eukaryotic translation initiation factor 5 isoform 4 [Canis lupus familiaris]	EIF5	gi|73964067		49 kDa		2	0	0	0	2
PREDICTED: tether containing UBX domain for GLUT4 isoformX1 [Canis lupus familiaris]	ASPSCR1	gi|73964675		59 kDa		1	1	0	0	2
PREDICTED: 39S ribosomal protein L12, mitochondrial [Canis lupus familiaris]	MRPL12	gi|73964761		21 kDa		2	0	0	0	2
Cluster of PREDICTED: signal transducer and activator of transcription 5A isoformX7 [Canis lupus familiaris] (gi|73965784)	STAT5A	gi|73965784	[3]	91 kDa	TRUE	2	0	0	0	2
PREDICTED: vacuolar-sorting protein SNF8 isoform 1 [Canis lupus familiaris]	SNF8	gi|73966269		29 kDa		2	0	0	0	2
Cluster of PREDICTED: serine/threonine-protein phosphatase 6 catalytic subunit isoform 3 [Canis lupus familiaris] (gi|73968080)	PPP6C	gi|73968080		33 kDa	TRUE	1	0	1	0	2
Cluster of PREDICTED: ras-related protein Rap-1b isoform 2 [Canis lupus familiaris] (gi|73968729)	RAP1B	gi|73968729	[2]	21 kDa	TRUE	2	0	0	0	2
PREDICTED: GTP-binding protein SAR1b [Canis lupus familiaris]	SAR1B	gi|73971260		22 kDa	TRUE	1	0	1	0	2
PREDICTED: lysosomal thioesterase PPT2 isoform X4 [Canis lupus familiaris]	PPT2	gi|73972357		34 kDa		1	0	1	0	2
PREDICTED: protein canopy homolog 3 [Canis lupus familiaris]	CNPY3	gi|73972976		31 kDa		0	0	1	1	2
PREDICTED: activating signal cointegrator 1 complex subunit 3 isoformX2 [Canis lupus familiaris]	ASCC3	gi|73973611		251 kDa		2	0	0	0	2
PREDICTED: nudC domain-containing protein 1 [Canis lupus familiaris]	NUDCD1	gi|73974518		67 kDa		0	0	1	1	2
PREDICTED: ubiquitin-like modifier activating enzyme 6 isoform X2 [Canis lupus familiaris]	UBA6	gi|73975341		118 kDa		1	0	0	1	2
PREDICTED: src kinase-associated phosphoprotein 2 isoform X3 [Canis lupus familiaris]	SKAP2	gi|73976519		41 kDa		1	0	1	0	2
PREDICTED: cullin-1 isoform 3 [Canis lupus familiaris]	CUL1	gi|73978425		90 kDa		1	1	0	0	2
Cluster of PREDICTED: pleckstrin homology domain-containing family A member 2 isoformX1 [Canis lupus familiaris] (gi|73979149)	PLEKHA2	gi|73979149	[2]	47 kDa	TRUE	1	0	0	1	2
PREDICTED: mannosyl-oligosaccharide glucosidase [Canis lupus familiaris]	MOGS	gi|73980965		92 kDa		1	0	1	0	2
PREDICTED: COMM domain-containing protein 9 [Canis lupus familiaris]	COMMD9	gi|73982299		22 kDa		2	0	0	0	2
PREDICTED: exosome complex component RRP45 isoform 1 [Canis lupus familiaris]	EXOSC9	gi|73983962		49 kDa		2	0	0	0	2
PREDICTED: alpha-1,6-mannosylglycoprotein 6-beta-N-acetylglucosaminyltransferase A isoform X2 [Canis lupus familiaris]	MGAT5	gi|73984271		85 kDa		0	1	0	1	2
Cluster of PREDICTED: DCC-interacting protein 13-alpha isoformX2 [Canis lupus familiaris] (gi|73985222)	APPL1	gi|73985222	[3]	80 kDa	TRUE	1	0	1	0	2
Cluster of PREDICTED: ELAV-like protein 1 isoform 1 [Canis lupus familiaris] (gi|73986922)	ELAVL1	gi|73986922	[2]	36 kDa	TRUE	1	0	1	0	2
PREDICTED: endophilin-A2 isoform 2 [Canis lupus familiaris]	SH3GL1	gi|73987150		41 kDa	TRUE	0	0	1	1	2
PREDICTED: basigin [Canis lupus familiaris]	BSG	gi|73987612		29 kDa		0	1	0	1	2
PREDICTED: calpain-5 isoformX1 [Canis lupus familiaris]	CAPN5	gi|73987887		73 kDa		0	1	1	0	2
PREDICTED: importin-7 isoform 1 [Canis lupus familiaris]	IPO7	gi|73988461		120 kDa	TRUE	0	0	0	2	2
PREDICTED: carboxypeptidase B2 [Canis lupus familiaris]	CPB2	gi|73989292		49 kDa		2	0	0	0	2
PREDICTED: phosphatidylinositol 4,5-bisphosphate 3-kinase catalytic subunit beta isoform isoform 1 [Canis lupus familiaris]	PIK3CB	gi|73990263		123 kDa	TRUE	1	0	1	0	2
PREDICTED: complement component C1q receptor [Canis lupus familiaris]	CD93	gi|73991045		68 kDa		2	0	0	0	2
PREDICTED: cysteine desulfurase, mitochondrial isoform 2 [Canis lupus familiaris]	NFS1	gi|73992307		50 kDa		1	0	1	0	2
PREDICTED: calcium-binding protein 39 isoform 1 [Canis lupus familiaris]	CAB39	gi|73993934		40 kDa	TRUE	1	0	0	1	2
Cluster of PREDICTED: autophagy-related protein 16-1 isoformX1 [Canis lupus familiaris] (gi|73993996)	ATG16L1	gi|73993996		66 kDa	TRUE	2	0	0	0	2
Cluster of PREDICTED: GATS protein-like 3 isoformX2 [Canis lupus familiaris] (gi|73995005)	GATSL3	gi|73995005		36 kDa	TRUE	1	1	0	0	2
PREDICTED: v-crk sarcoma virus CT10 oncogene homolog (avian) isoform 1 [Canis lupus familiaris]	CRKL	gi|73995905		34 kDa	TRUE	1	1	0	0	2
PREDICTED: keratin, type II cytoskeletal 78 [Canis lupus familiaris]	KRT78	gi|73996461		56 kDa	TRUE	1	0	0	1	2
PREDICTED: complement C1r subcomponent isoformX1 [Canis lupus familiaris]	C1R	gi|73997271		80 kDa	TRUE	0	0	1	1	2
Cluster of PREDICTED: bifunctional protein NCOAT isoform 1 [Canis lupus familiaris] (gi|73998301)	MGEA5	gi|73998301		103 kDa	TRUE	0	0	1	1	2
Cluster of PREDICTED: golgi-specific brefeldin A-resistance guanine nucleotide exchange factor 1 isoformX1 [Canis lupus familiaris] (gi|73998365)	GBF1	gi|73998365	[2]	206 kDa	TRUE	1	1	0	0	2
PREDICTED: von Willebrand factor A domain-containing protein 2 [Canis lupus familiaris]	VWA2	gi|73998866		85 kDa		0	1	0	1	2
PREDICTED: lactamase, beta 2 isoformX1 [Canis lupus familiaris]	LACTB2	gi|73999212		33 kDa		1	1	0	0	2
PREDICTED: F-box only protein 22 [Canis lupus familiaris]	FBXO22	gi|74001045		44 kDa		2	0	0	0	2
PREDICTED: eukaryotic translation initiation factor 4E isoformX1 [Canis lupus familiaris]	EIF4E	gi|74001995		25 kDa		1	0	0	1	2
PREDICTED: methylcrotonoyl-CoA carboxylase subunit alpha, mitochondrial isoform 1 [Canis lupus familiaris]	MCCC1	gi|74003228		80 kDa	TRUE	1	0	1	0	2
PREDICTED: claudin-1 [Canis lupus familiaris]	CLDN1	gi|74003604		23 kDa		1	0	0	1	2
PREDICTED: protein phosphatase 1L [Canis lupus familiaris]	PPM1L	gi|74003697		41 kDa		1	1	0	0	2
Cluster of PREDICTED: NAD-dependent protein deacylase sirtuin-5, mitochondrial isoform X3 [Canis lupus familiaris] (gi|74004087)	SIRT5	gi|74004087		34 kDa	TRUE	0	0	2	0	2
PREDICTED: RING finger protein 39 [Canis lupus familiaris]	RNF39	gi|74004300		38 kDa	TRUE	0	0	1	1	2
Cluster of gi|74006052|ref|XP_536116.2| PREDICTED: ubiquitin carboxyl-terminal hydrolase isozyme L5 isoform X2 [Canis lupus familiaris] (gi|74006052|ref|XP_536116.2| PREDICTED: ubiquitin carboxyl-terminal hydrolase isozyme L5 isoform X2 [Canis lupus familiaris]-DECOY)	UCHL5	gi|74006052|	ref|XP_536116.2| PREDICTED: ubiquitin carboxyl-terminal hydrolase isozyme L5 isoform X2 [Canis lupus familiaris]-DECOY [2]	?	TRUE	0	0	1	1	2
PREDICTED: prefoldin subunit 2 [Canis lupus familiaris]	PFDN2	gi|74006277		17 kDa		2	0	0	0	2
PREDICTED: peroxisomal biogenesis factor 19 [Canis lupus familiaris]	PEX19	gi|74006307		33 kDa		0	1	1	0	2
Cluster of PREDICTED: putative RNA-binding protein 3 isoformX2 [Canis lupus familiaris] (gi|74006873)	RBM3	gi|74006873		18 kDa	TRUE	1	0	1	0	2
PREDICTED: properdin [Canis lupus familiaris]	CFP	gi|74007356		51 kDa		0	0	1	1	2
PREDICTED: UDP-N-acetylglucosamine--peptide N-acetylglucosaminyltransferase 110 kDa subunit isoformX2 [Canis lupus familiaris]	OGT	gi|74007670		117 kDa		0	1	1	0	2
Cluster of PREDICTED: ribose-phosphate pyrophosphokinase 1 isoformX2 [Canis lupus familiaris] (gi|74008042)	PRPS1	gi|74008042		35 kDa	TRUE	1	0	1	0	2
PREDICTED: alpha-galactosidase A [Canis lupus familiaris]	GLA	gi|74008237		48 kDa		0	1	0	1	2
PREDICTED: V-type proton ATPase subunit S1 isoform 1 [Canis lupus familiaris]	ATP6AP1	gi|74008854		52 kDa		2	0	0	0	2
ammonium transporter Rh type C [Canis lupus familiaris]	RHCG	gi|114158624		51 kDa	TRUE	0	0	1	0	1
NADH-cytochrome b5 reductase 3 [Canis lupus familiaris]	CYB5R3	gi|114326313		34 kDa	TRUE	1	0	0	0	1
2'-5'-oligoadenylate synthase 3 [Canis lupus familiaris]	OAS3	gi|114326317		122 kDa		1	0	0	0	1
ras-related protein Rab-27A [Canis lupus familiaris]	RAB27A	gi|114326367		25 kDa	TRUE	0	0	0	1	1
rho GTPase-activating protein 1 [Canis lupus familiaris]	ARHGAP1	gi|134085902		51 kDa	TRUE	0	0	0	1	1
Cluster of stromal membrane-associated protein 1 [Canis lupus familiaris] (gi|148226605)	SMAP1	gi|148226605		51 kDa	TRUE	1	0	0	0	1
cytochrome b-245, beta polypeptide [Canis lupus familiaris]	Nox2	gi|154152055		65 kDa		0	0	1	0	1
frataxin, mitochondrial [Canis lupus familiaris]	fxn	gi|158262735		22 kDa		0	0	1	0	1
LSM4 homolog, U6 small nuclear RNA associated [Canis lupus familiaris]	LSM4	gi|160837874		15 kDa		1	0	0	0	1
selenoprotein M precursor [Canis lupus familiaris]	SELM	gi|169234774		16 kDa		1	0	0	0	1
selenoprotein P precursor [Canis lupus familiaris]	SEPP1	gi|169403968		45 kDa		1	0	0	0	1
Cluster of myosin-8 [Canis lupus familiaris] (gi|189303587)	MYH8	gi|189303587		223 kDa	TRUE	1	0	0	0	1
copine-1 [Canis lupus familiaris]	CPNE1	gi|284795268		59 kDa	TRUE	1	0	0	0	1
Cluster of SPARC related modular calcium binding 2 precursor [Canis lupus familiaris] (gi|295317381)	SMOC2	gi|295317381		49 kDa	TRUE	1	0	0	0	1
heme oxygenase 1 [Canis lupus familiaris]	Q6Q2K4	gi|303227961		33 kDa	TRUE	1	0	0	0	1
membrane-associated progesterone receptor component 1 [Canis lupus familiaris]	PGRMC1	gi|305410870		22 kDa	TRUE	1	0	0	0	1
intercellular adhesion molecule 1 precursor [Canis lupus familiaris]	ICAM1	gi|308081738		58 kDa	TRUE	1	0	0	0	1
gi|308210787|ref|NP_001184085.1| thrombospondin-2 precursor [Canis lupus familiaris]	THBS2	gi|308210787	|ref|NP_001184085.1| thrombospondin-2 precursor [Canis lupus familiaris]-DECOY	?	TRUE	1	0	0	0	1
kallikrein-6 precursor [Canis lupus familiaris]	KLK6	gi|308210822		27 kDa		0	0	1	0	1
ras-related protein Rab-10 [Canis lupus familiaris]	RAB10	gi|311771751		23 kDa	TRUE	0	0	1	0	1
eukaryotic translation initiation factor 4E-binding protein 3 [Canis lupus familiaris]	EIF4EBP3	gi|321400065		11 kDa		0	0	0	1	1
cytosolic phospholipase A2 beta [Canis lupus familiaris]	PLA2G4B	gi|324123885		89 kDa		0	0	1	0	1
arachidonate 5-lipoxygenase [Canis lupus familiaris]	E7ECW0	gi|326693955		78 kDa		0	0	0	1	1
PREDICTED: signal transducer and activator of transcription 6 isoform X1 [Canis lupus familiaris]	STAT6	gi|345776418		94 kDa		1	0	0	0	1
PREDICTED: galectin-related protein [Canis lupus familiaris]	LGALSL	gi|345777006		18 kDa		0	1	0	0	1
PREDICTED: pyridoxal phosphate phosphatase [Canis lupus familiaris]	PDXP	gi|345777073		32 kDa		1	0	0	0	1
PREDICTED: transmembrane protein 131 [Canis lupus familiaris]	TMEM131	gi|345777249		205 kDa		0	0	0	1	1
Cluster of PREDICTED: bifunctional UDP-N-acetylglucosamine 2-epimerase/N-acetylmannosamine kinase isoformX1 [Canis lupus familiaris] (gi|345777595)	GNE	gi|345777595	[2]	83 kDa	TRUE	1	0	0	0	1
PREDICTED: protein NipSnap homolog 3A [Canis lupus familiaris]	NIPSNAP3A	gi|345777666		28 kDa	TRUE	0	0	1	0	1
PREDICTED: elongator complex protein 1 isoform X3 [Canis lupus familiaris]	IKBKAP	gi|345777683	(+1)	150 kDa		1	0	0	0	1
PREDICTED: GDNF family receptor alpha like [Canis lupus familiaris]	GFRAL	gi|345778503		45 kDa		0	0	0	1	1
PREDICTED: ly6/PLAUR domain-containing protein 2 [Canis lupus familiaris]	LYPD2	gi|345779529		22 kDa		1	0	0	0	1
PREDICTED: non-syndromic hearing impairment protein 5 [Canis lupus familiaris]	DFNA5	gi|345779933		55 kDa		1	0	0	0	1
Cluster of PREDICTED: apoptotic protease-activating factor 1 isoform X1 [Canis lupus familiaris] (gi|345781094)	APAF1	gi|345781094	[2]	142 kDa	TRUE	0	0	1	0	1
gi|345781135|ref|XP_532669.3| PREDICTED: nucleoporin Nup37 isoform X2 [Canis lupus familiaris]	NUP37	gi|345781135	|ref|XP_532669.3| PREDICTED: nucleoporin Nup37 isoform X2 [Canis lupus familiaris]-DECOY	?		0	0	0	1	1
PREDICTED: tissue-type plasminogen activator [Canis lupus familiaris]	PLAT	gi|345781617		64 kDa		1	0	0	0	1
Cluster of PREDICTED: small ubiquitin-related modifier 2-like [Canis lupus familiaris] (gi|345781678)	LOC100682962	gi|345781678		9 kDa	TRUE	1	0	0	0	1
PREDICTED: intersectin-2 isoform 2 [Canis lupus familiaris]	ITSN2	gi|345781917		193 kDa	TRUE	0	0	1	0	1
PREDICTED: sorting nexin-17 isoform 10 [Canis lupus familiaris]	SNX17	gi|345782122		51 kDa		1	0	0	0	1
PREDICTED: protein prune homolog isoform X2 [Canis lupus familiaris]	PRUNE	gi|345782628	(+1)	50 kDa		1	0	0	0	1
PREDICTED: LOW QUALITY PROTEIN: BCL2/adenovirus E1B 19kD interacting protein like [Canis lupus familiaris]	BNIPL	gi|345782630		40 kDa		0	0	0	1	1
PREDICTED: conserved oligomeric Golgi complex subunit 5 isoform X2 [Canis lupus familiaris]	COG5	gi|345782986	(+1)	109 kDa		1	0	0	0	1
PREDICTED: LOW QUALITY PROTEIN: phosphofurin acidic cluster sorting protein 1 [Canis lupus familiaris]	PACS1	gi|345783091		105 kDa		0	0	1	0	1
PREDICTED: heterogeneous nuclear ribonucleoprotein U-like 2 [Canis lupus familiaris]	HNRNPUL2	gi|345783239		85 kDa		0	0	1	0	1
PREDICTED: vacuolar protein sorting-associated protein 37C [Canis lupus familiaris]	VPS37C	gi|345783305		39 kDa		1	0	0	0	1
PREDICTED: chitinase domain-containing protein 1 [Canis lupus familiaris]	CHID1	gi|345783982		45 kDa		1	0	0	0	1
PREDICTED: FGFR1 oncogene partner [Canis lupus familiaris]	FGFR1OP	gi|345784495		40 kDa		0	0	0	1	1
PREDICTED: laminin subunit alpha-2 [Canis lupus familiaris]	LAMA2	gi|345784566		342 kDa	TRUE	1	0	0	0	1
Cluster of PREDICTED: LOW QUALITY PROTEIN: transducin-like enhancer protein 1 [Canis lupus familiaris] (gi|345784934)	TLE1	gi|345784934		83 kDa	TRUE	1	0	0	0	1
PREDICTED: tyrosine-protein kinase SYK isoformX1 [Canis lupus familiaris]	SYK	gi|345785566		72 kDa	TRUE	0	0	0	1	1
PREDICTED: 60S ribosomal protein L28 isoform 2 [Canis lupus familiaris]	RPL28	gi|345785949		16 kDa		1	0	0	0	1
Cluster of PREDICTED: BDNF/NT-3 growth factors receptor isoform X3 [Canis lupus familiaris] (gi|345786030)	NTRK2	gi|345786030	[2]	92 kDa	TRUE	0	1	0	0	1
PREDICTED: lysosomal alpha-mannosidase isoformX1 [Canis lupus familiaris]	MAN2B1	gi|345786397	(+1)	113 kDa	TRUE	0	0	1	0	1
PREDICTED: tyrosine-protein phosphatase non-receptor type 23 [Canis lupus familiaris]	PTPN23	gi|345786959		127 kDa	TRUE	1	0	0	0	1
Cluster of PREDICTED: ubiquitin carboxyl-terminal hydrolase 4 isoformX2 [Canis lupus familiaris] (gi|345787398)	USP4	gi|345787398		109 kDa	TRUE	0	1	0	0	1
Cluster of PREDICTED: olfactory receptor 56A3 [Canis lupus familiaris] (gi|345788458)	COR56A20	gi|345788458		35 kDa	TRUE	0	0	0	1	1
PREDICTED: LOW QUALITY PROTEIN: dnaJ homolog subfamily C member 13 [Canis lupus familiaris]	DNAJC13	gi|345789180		254 kDa	TRUE	1	0	0	0	1
Cluster of PREDICTED: cytoplasmic protein NCK1 isoformX3 [Canis lupus familiaris] (gi|345789233)	NCK1	gi|345789233		35 kDa	TRUE	0	0	1	0	1
PREDICTED: signal-regulatory protein beta-2 [Canis lupus familiaris]	SIRPB2	gi|345789560		38 kDa		1	0	0	0	1
PREDICTED: phosphatidylinositol 3,4,5-trisphosphate-dependent Rac exchanger 1 protein [Canis lupus familiaris]	PREX1	gi|345789700		179 kDa	TRUE	0	0	1	0	1
PREDICTED: eukaryotic translation initiation factor 2 subunit 2 isoform 6 [Canis lupus familiaris]	EIF2S2	gi|345789938		38 kDa		0	0	0	1	1
PREDICTED: DNA topoisomerase 1 [Canis lupus familiaris]	TOP1	gi|345790055		91 kDa		1	0	0	0	1
Cluster of PREDICTED: exportin-4 isoform X6 [Canis lupus familiaris] (gi|345790328)	XPO4	gi|345790328	[3]	130 kDa	TRUE	1	0	0	0	1
PREDICTED: tripartite motif-containing protein 35 [Canis lupus familiaris]	TRIM35	gi|345790523		56 kDa		1	0	0	0	1
PREDICTED: rasGAP-activating-like protein 1 [Canis lupus familiaris]	RASAL1	gi|345791169		90 kDa	TRUE	1	0	0	0	1
PREDICTED: LOW QUALITY PROTEIN: nuclear receptor corepressor 2 [Canis lupus familiaris]	NCOR2	gi|345791303		276 kDa	TRUE	0	0	0	1	1
PREDICTED: stromal cell-derived factor 2-like 1 [Canis lupus familiaris]	SDF2L1	gi|345791445		24 kDa	TRUE	1	0	0	0	1
PREDICTED: fructose-2,6-bisphosphatase TIGAR [Canis lupus familiaris]	TIGAR	gi|345791680		30 kDa		0	0	1	0	1
Cluster of gi|345792069|ref|XP_543840.3| PREDICTED: complement component 1, r subcomponent-like isoformX1 [Canis lupus familiaris] (gi|345792069|ref|XP_543840.3| PREDICTED: complement component 1, r subcomponent-like isoformX1 [Canis lupus familiaris]-DECOY)	C1RL	gi|345792069	|ref|XP_543840.3| PREDICTED: complement component 1, r subcomponent-like isoformX1 [Canis lupus familiaris]-DECOY [2]	?	TRUE	0	0	1	0	1
PREDICTED: uncharacterized protein LOC100682701 [Canis lupus familiaris]	LOC100682701	gi|345792426		56 kDa		1	0	0	0	1
PREDICTED: hypoxia-inducible factor 1-alpha inhibitor [Canis lupus familiaris]	HIF1AN	gi|345792689		40 kDa		1	0	0	0	1
PREDICTED: plexin domain-containing protein 2 [Canis lupus familiaris]	PLXDC2	gi|345793467		59 kDa	TRUE	1	0	0	0	1
PREDICTED: LOW QUALITY PROTEIN: neuroblastoma suppressor of tumorigenicity 1 [Canis lupus familiaris]	NBL1	gi|345793744		23 kDa		0	0	0	1	1
Cluster of PREDICTED: serine protease inhibitor Kazal-type 6 isoformX2 [Canis lupus familiaris] (gi|345794017)	SPINK6	gi|345794017		12 kDa	TRUE	1	0	0	0	1
PREDICTED: peptidyl-prolyl cis-trans isomerase CWC27 homolog isoform 3 [Canis lupus familiaris]	CWC27	gi|345794141		53 kDa		0	0	0	1	1
PREDICTED: LOW QUALITY PROTEIN: monocyte differentiation antigen CD14 [Canis lupus familiaris]	CD14	gi|345794218		40 kDa		1	0	0	0	1
PREDICTED: BSD domain-containing protein 1 isoformX4 [Canis lupus familiaris]	BSDC1	gi|345794333		47 kDa		0	0	0	1	1
PREDICTED: unconventional myosin-Ie isoform X2 [Canis lupus familiaris]	MYO1E	gi|345795005		127 kDa	TRUE	0	0	0	1	1
PREDICTED: heat shock 70 kDa protein 13 [Canis lupus familiaris]	HSPA13	gi|345795505		52 kDa		0	0	0	1	1
PREDICTED: osteopontin isoform 1 [Canis lupus familiaris]	SPP1	gi|345795731	(+1)	30 kDa		0	0	1	0	1
PREDICTED: resistin like beta [Canis lupus familiaris]	RETNLB	gi|345796063		12 kDa		1	0	0	0	1
PREDICTED: LOW QUALITY PROTEIN: DNA polymerase theta [Canis lupus familiaris]	POLQ	gi|345796069		289 kDa		0	0	0	1	1
PREDICTED: protein disulfide-isomerase A5 [Canis lupus familiaris]	PDIA5	gi|345796092		60 kDa		0	1	0	0	1
gi|345796375|ref|XP_535824.3| PREDICTED: 26S proteasome non-ATPase regulatory subunit 2 [Canis lupus familiaris]	PSMD2	gi|345796375	|ref|XP_535824.3| PREDICTED: 26S proteasome non-ATPase regulatory subunit 2 [Canis lupus familiaris]-DECOY	?		1	0	0	0	1
PREDICTED: ephrin type-B receptor 3 isoform 2 [Canis lupus familiaris]	EPHB3	gi|345796384		106 kDa	TRUE	0	0	1	0	1
PREDICTED: valacyclovir hydrolase isoform X2 [Canis lupus familiaris]	BPHL	gi|345796936		33 kDa		0	0	0	1	1
PREDICTED: nck-associated protein 1 [Canis lupus familiaris]	NCKAP1	gi|345797072		126 kDa	TRUE	0	0	0	1	1
PREDICTED: olfactory receptor 10T2-like [Canis lupus familiaris]	LOC610646	gi|345797899		35 kDa		0	0	0	1	1
PREDICTED: alpha-2-macroglobulin receptor-associated protein [Canis lupus familiaris]	LRPAP1	gi|345798366		42 kDa	TRUE	1	0	0	0	1
Cluster of PREDICTED: SH3 domain-binding protein 2 isoformX3 [Canis lupus familiaris] (gi|345798381)	SH3BP2	gi|345798381	[2]	66 kDa	TRUE	1	0	0	0	1
PREDICTED: protein FAM184B isoform X2 [Canis lupus familiaris]	FAM184B	gi|345798400		122 kDa		1	0	0	0	1
gi|345798602|ref|XP_536297.3| PREDICTED: G-protein coupled receptor 98 [Canis lupus familiaris]	GPR98	gi|345798602	|ref|XP_536297.3| PREDICTED: G-protein coupled receptor 98 [Canis lupus familiaris]-DECOY	?		0	0	0	1	1
PREDICTED: protein FAM151B isoform X3 [Canis lupus familiaris]	FAM151B	gi|345798640		31 kDa		1	0	0	0	1
PREDICTED: CMP-N-acetylneuraminate-poly-alpha-2,8-sialyltransferase [Canis lupus familiaris]	St8sia4	gi|345798733		41 kDa		1	0	0	0	1
PREDICTED: activated RNA polymerase II transcriptional coactivator p15 [Canis lupus familiaris]	SUB1	gi|345798927		14 kDa		1	0	0	0	1
PREDICTED: dedicator of cytokinesis protein 2 [Canis lupus familiaris]	DOCK2	gi|345799388		212 kDa	TRUE	0	0	1	0	1
PREDICTED: polypeptide N-acetylgalactosaminyltransferase 10 [Canis lupus familiaris]	GALNT10	gi|345799489		69 kDa		1	0	0	0	1
PREDICTED: ras GTPase-activating protein-binding protein 1 isoform 4 [Canis lupus familiaris]	G3BP1	gi|345799503		52 kDa	TRUE	0	0	1	0	1
PREDICTED: myelin protein zero-like 2 [Canis lupus familiaris]	MPZL2	gi|345799717		25 kDa		0	0	0	1	1
PREDICTED: 40S ribosomal protein S25 [Canis lupus familiaris]	RPS25	gi|345799858		14 kDa		1	0	0	0	1
PREDICTED: alpha-crystallin B chain isoform 5 [Canis lupus familiaris]	CRYAB	gi|345799951		20 kDa		1	0	0	0	1
PREDICTED: phosphoribosylformylglycinamidine synthase isoform X3 [Canis lupus familiaris]	PFAS	gi|345800235		145 kDa		0	0	1	0	1
Cluster of PREDICTED: 60S ribosomal protein L23a-like [Canis lupus familiaris] (gi|345800307)	LOC100687735	gi|345800307	[2]	17 kDa	TRUE	1	0	0	0	1
PREDICTED: protein Hook homolog 1 [Canis lupus familiaris]	HOOK1	gi|345800425		85 kDa		1	0	0	0	1
Cluster of PREDICTED: ubiquitin conjugation factor E4 B isoformX1 [Canis lupus familiaris] (gi|345800685)	UBE4B	gi|345800685	[2]	133 kDa	TRUE	1	0	0	0	1
PREDICTED: LOW QUALITY PROTEIN: kinesin family member 1B isoform 1 [Canis lupus familiaris]	KIF1B	gi|345800687		199 kDa	TRUE	0	0	0	1	1
PREDICTED: LOW QUALITY PROTEIN: malonyl-CoA decarboxylase, mitochondrial [Canis lupus familiaris]	MLYCD	gi|345801055		55 kDa		1	0	0	0	1
PREDICTED: UPF0764 protein C16orf89 homolog [Canis lupus familiaris]	C16orf89	gi|345801917		42 kDa		0	0	0	1	1
PREDICTED: cyclin-F isoform X2 [Canis lupus familiaris]	CCNF	gi|345802406		87 kDa		0	0	1	0	1
PREDICTED: ras-related protein Rab-25 isoform X2 [Canis lupus familiaris]	RAB25	gi|345802588		24 kDa	TRUE	0	0	0	1	1
Cluster of PREDICTED: desmocollin-1 isoformX2 [Canis lupus familiaris] (gi|345802790)	DSC1	gi|345802790		100 kDa	TRUE	0	0	0	1	1
PREDICTED: tetratricopeptide repeat protein 39C [Canis lupus familiaris]	TTC39C	gi|345803342		59 kDa		0	0	0	1	1
PREDICTED: LOW QUALITY PROTEIN: dehydrogenase/reductase SDR family member 1 [Canis lupus familiaris]	DHRS1	gi|345804217		34 kDa		0	1	0	0	1
PREDICTED: LOW QUALITY PROTEIN: E3 ubiquitin-protein ligase HECTD1 isoform 1 [Canis lupus familiaris]	HECTD1	gi|345804260		289 kDa		0	0	0	1	1
PREDICTED: ribosomal protein L10-like isoform X2 [Canis lupus familiaris]	RPL10L	gi|345804316		25 kDa	TRUE	1	0	0	0	1
PREDICTED: guanine nucleotide-binding protein G(I)/G(S)/G(O) subunit gamma-2 isoform X3 [Canis lupus familiaris]	Gng2	gi|345804362		8 kDa	TRUE	1	0	0	0	1
PREDICTED: protein Smaug homolog 1 isoformX4 [Canis lupus familiaris]	SAMD4A	gi|345804391		79 kDa	TRUE	0	0	0	1	1
PREDICTED: kinectin isoform X8 [Canis lupus familiaris]	KTN1	gi|345804402		151 kDa		0	0	0	1	1
PREDICTED: 5'(3')-deoxyribonucleotidase, cytosolic type, partial [Canis lupus familiaris]	NT5C	gi|345804772		19 kDa		1	0	0	0	1
PREDICTED: calcium/calmodulin-dependent protein kinase kinase 1 isoform 2 [Canis lupus familiaris]	CAMKK1	gi|345805079		55 kDa		1	0	0	0	1
PREDICTED: beclin-1 isoformX1 [Canis lupus familiaris]	BECN1	gi|345805137	(+1)	52 kDa		1	0	0	0	1
Cluster of PREDICTED: keratin, type I cuticular Ha8 [Canis lupus familiaris] (gi|345805139)	KRT37	gi|345805139	[3]	49 kDa	TRUE	1	0	0	0	1
PREDICTED: coiled-coil domain-containing protein 43 isoform X2 [Canis lupus familiaris]	CCDC43	gi|345805450		25 kDa		0	0	1	0	1
PREDICTED: unconventional myosin-Id [Canis lupus familiaris]	MYO1D	gi|345805768		116 kDa	TRUE	1	0	0	0	1
Cluster of PREDICTED: beta-lactoglobulin-2-like [Canis lupus familiaris] (gi|345806191)	LOC607807	gi|345806191	[2]	23 kDa	TRUE	1	0	0	0	1
PREDICTED: trafficking protein particle complex 2 [Canis lupus familiaris]	TRAPPC2	gi|345806808		22 kDa		1	0	0	0	1
PREDICTED: LOW QUALITY PROTEIN: serine/threonine-protein kinase A-Raf isoform 1 [Canis lupus familiaris]	ARAF	gi|345807097		67 kDa	TRUE	1	0	0	0	1
PREDICTED: proSAAS [Canis lupus familiaris]	PCSK1N	gi|345807130		27 kDa		0	0	1	0	1
PREDICTED: serine/threonine-protein kinase MST4 isoform X2 [Canis lupus familiaris]	STK26	gi|345807222		47 kDa	TRUE	0	0	0	1	1
PREDICTED: LOW QUALITY PROTEIN: ephrin-B1 [Canis lupus familiaris]	EFNB1	gi|345807425		37 kDa		0	1	0	0	1
PREDICTED: SAM and SH3 domain-containing protein 3 isoform X2 [Canis lupus familiaris]	SASH3	gi|345808038		42 kDa		1	0	0	0	1
60S ribosomal protein L27 [Canis lupus familiaris]	RPL27	gi|354622964		16 kDa		1	0	0	0	1
C-Myc-binding protein [Canis lupus familiaris]	MYCBP	gi|356582465		12 kDa		1	0	0	0	1
COMM domain-containing protein 3 [Canis lupus familiaris]	COMMD3	gi|356640240		22 kDa		0	0	0	1	1
Cluster of S-phase kinase-associated protein 1 [Canis lupus familiaris] (gi|356991212)	Skp1	gi|356991212		19 kDa	TRUE	0	0	1	0	1
keratin, type I cytoskeletal 19 [Canis lupus familiaris]	KRT19	gi|359279916		44 kDa	TRUE	0	0	0	1	1
Cluster of PREDICTED: dynein light chain Tctex-type 1 isoform X1 [Canis lupus familiaris] (gi|359318505)	CW-1	gi|359318505		12 kDa	TRUE	1	0	0	0	1
PREDICTED: basal cell adhesion molecule [Canis lupus familiaris]	BCAM	gi|359318637		68 kDa		1	0	0	0	1
PREDICTED: LOW QUALITY PROTEIN: protein patched homolog 1 [Canis lupus familiaris]	PTCH1	gi|359318849		161 kDa		0	0	0	1	1
PREDICTED: LDLR chaperone MESD [Canis lupus familiaris]	MESDC2	gi|359319169		29 kDa		0	0	0	1	1
PREDICTED: WD repeat-containing protein 93 isoform X1 [Canis lupus familiaris]	WDR93	gi|359319196		78 kDa		0	0	0	1	1
PREDICTED: F-box only protein 4 [Canis lupus familiaris]	FBXO4	gi|359319255		44 kDa		0	0	0	1	1
PREDICTED: protein disulfide-isomerase A2 isoform X1 [Canis lupus familiaris]	PDIA2	gi|359319817		58 kDa		0	0	1	0	1
PREDICTED: leukocyte surface antigen CD53 [Canis lupus familiaris]	CD53	gi|359319836		24 kDa		1	0	0	0	1
PREDICTED: sorting nexin-6 [Canis lupus familiaris]	DKFZp459M2127	gi|359320043		47 kDa	TRUE	1	0	0	0	1
PREDICTED: CDK5 regulatory subunit-associated protein 3 [Canis lupus familiaris]	CDK5RAP3	gi|359320346		57 kDa		1	0	0	0	1
PREDICTED: biogenesis of lysosome-related organelles complex 1 subunit 1 isoform X4 [Canis lupus familiaris]	BLOC1S1	gi|359320538		14 kDa		1	0	0	0	1
PREDICTED: prolow-density lipoprotein receptor-related protein 1 [Canis lupus familiaris]	LRP1	gi|359320553		505 kDa	TRUE	0	1	0	0	1
gi|359320705|ref|XP_538573.3| PREDICTED: metabotropic glutamate receptor 6 [Canis lupus familiaris]	GRM6	gi|359320705	|ref|XP_538573.3| PREDICTED: metabotropic glutamate receptor 6 [Canis lupus familiaris]-DECOY	?	TRUE	0	0	0	1	1
Cluster of PREDICTED: acidic leucine-rich nuclear phosphoprotein 32 family member E isoformX1 [Canis lupus familiaris] (gi|359321697)	ANP32E	gi|359321697	[2]	30 kDa	TRUE	1	0	0	0	1
Cluster of PREDICTED: rho-related GTP-binding protein RhoD isoformX2 [Canis lupus familiaris] (gi|359321784)	RHOD	gi|359321784		24 kDa	TRUE	1	0	0	0	1
PREDICTED: DNA replication licensing factor MCM2 [Canis lupus familiaris]	MCM2	gi|359322058		104 kDa		0	0	1	0	1
PREDICTED: lipid phosphate phosphohydrolase 2 [Canis lupus familiaris]	PLPP2	gi|359322179		32 kDa	TRUE	0	1	0	0	1
PREDICTED: growth arrest-specific protein 6 [Canis lupus familiaris]	GAS6	gi|359322545		76 kDa		1	0	0	0	1
Cluster of PREDICTED: uncharacterized protein C2orf54 homolog [Canis lupus familiaris] (gi|359322878)	C25H2orf54	gi|359322878	[2]	49 kDa	TRUE	0	0	0	1	1
PREDICTED: ras-related protein Rab-35 isoform 2 [Canis lupus familiaris]	RAB35	gi|359322950		23 kDa	TRUE	1	0	0	0	1
PREDICTED: D-dopachrome decarboxylase-like [Canis lupus familiaris]	DDT	gi|359323006		13 kDa		1	0	0	0	1
PREDICTED: slit homolog 1 protein isoform X2 [Canis lupus familiaris]	SLIT1	gi|359323220		168 kDa	TRUE	0	1	0	0	1
PREDICTED: erythroid differentiation-related factor 1 isoformX2 [Canis lupus familiaris]	EDRF1	gi|359323265		135 kDa		0	0	0	1	1
PREDICTED: cytosolic phospholipase A2 delta [Canis lupus familiaris]	PLA2G4D	gi|359323358		91 kDa		1	0	0	0	1
PREDICTED: cingulin-like 1 isoform X3 [Canis lupus familiaris]	CGNL1	gi|359323385		148 kDa	TRUE	1	0	0	0	1
PREDICTED: dual oxidase maturation factor 1 isoform X1 [Canis lupus familiaris]	DUOXA1	gi|359323435		38 kDa		0	0	0	1	1
PREDICTED: estradiol 17-beta-dehydrogenase 11 [Canis lupus familiaris]	HSD17B11	gi|359323638		33 kDa	TRUE	1	0	0	0	1
PREDICTED: N-alpha-acetyltransferase 50 [Canis lupus familiaris]	NAT13	gi|359323735		19 kDa		0	0	0	1	1
PREDICTED: LOW QUALITY PROTEIN: bromodomain-containing protein 9 [Canis lupus familiaris]	BRD9	gi|359323738		61 kDa		0	0	0	1	1
PREDICTED: translation initiation factor eIF-2B subunit epsilon [Canis lupus familiaris]	EIF2B5	gi|359323805		80 kDa	TRUE	1	0	0	0	1
gi|359323889|ref|XP_852443.2| PREDICTED: homeobox protein Hox-D9 [Canis lupus familiaris]	HOXD9	gi|359323889	|ref|XP_852443.2| PREDICTED: homeobox protein Hox-D9 [Canis lupus familiaris]-DECOY	?		0	0	0	1	1
PREDICTED: lysophospholipase-like protein 1 [Canis lupus familiaris]	LYPLAL1	gi|359323997		26 kDa		1	0	0	0	1
Cluster of PREDICTED: sorting nexin-12 isoform X1 [Canis lupus familiaris] (gi|359324023)	SNX12	gi|359324023	[2]	19 kDa	TRUE	0	1	0	0	1
PREDICTED: synaptotagmin-like 4 isoform X1 [Canis lupus familiaris]	SYTL4	gi|359324038	(+1)	77 kDa	TRUE	0	0	0	1	1
Cluster of PREDICTED: cullin-4B isoform 3 [Canis lupus familiaris] (gi|359324061)	CUL4B	gi|359324061		104 kDa	TRUE	0	0	1	0	1
PREDICTED: peroxiredoxin-4 isoformX2 [Canis lupus familiaris]	PRDX4	gi|359324137		30 kDa	TRUE	1	0	0	0	1
dynein light chain Tctex-type 3 [Canis lupus familiaris]	DYNLT3	gi|50950245		13 kDa		1	0	0	0	1
carboxypeptidase B precursor [Canis lupus familiaris]	CPB1	gi|50950255		48 kDa		1	0	0	0	1
induced myeloid leukemia cell differentiation protein Mcl-1 homolog [Canis lupus familiaris]	mcl-1	gi|50978640		37 kDa		1	0	0	0	1
rho GTPase-activating protein 35 [Canis lupus familiaris]	ARHGAP35	gi|50978650		170 kDa	TRUE	1	0	0	0	1
prostaglandin-H2 D-isomerase precursor [Canis lupus familiaris]	PTGDS	gi|50978842		21 kDa		1	0	0	0	1
DNA-binding protein A [Canis lupus familiaris]	ZONAB	gi|50978844		32 kDa	TRUE	0	1	0	0	1
phosphatidylinositol 3,4,5-trisphosphate 3-phosphatase and dual-specificity protein phosphatase PTEN [Canis lupus familiaris]	PTEN	gi|50978942		47 kDa		1	0	0	0	1
Cluster of beta-glucuronidase precursor [Canis lupus familiaris] (gi|50978948)	GUSB	gi|50978948		74 kDa	TRUE	1	0	0	0	1
galactocerebrosidase precursor [Canis lupus familiaris]	GALC	gi|50979024		75 kDa	TRUE	1	0	0	0	1
sodium/potassium-transporting ATPase subunit beta-1 [Canis lupus familiaris]	ATP1B1	gi|50979092		35 kDa		1	0	0	0	1
arginine esterase precursor [Canis lupus familiaris]	P09582	gi|50979094	(+1)	29 kDa		0	0	1	0	1
solute carrier family 2, facilitated glucose transporter member 3 precursor [Canis lupus familiaris]	SLC2A3	gi|50979140		54 kDa	TRUE	1	0	0	0	1
dolichyl-diphosphooligosaccharide--protein glycosyltransferase 48 kDa subunit precursor [Canis lupus familiaris]	DDOST	gi|50979164		50 kDa		1	0	0	0	1
coagulation factor IX preproprotein [Canis lupus familiaris]	F9	gi|50979168		51 kDa		1	0	0	0	1
PREDICTED: zinc-binding alcohol dehydrogenase domain-containing protein 2 [Canis lupus familiaris]	ZADH2	gi|545485029		40 kDa		0	0	0	1	1
PREDICTED: NAD-dependent malic enzyme, mitochondrial isoform X3 [Canis lupus familiaris]	ME2	gi|545485302		65 kDa		0	0	0	1	1
PREDICTED: mRNA cap guanine-N7 methyltransferase isoform X4 [Canis lupus familiaris]	RNMT	gi|545485317		55 kDa		0	0	1	0	1
Cluster of PREDICTED: ralBP1-associated Eps domain-containing protein 1 isoform X3 [Canis lupus familiaris] (gi|545485479)	REPS1	gi|545485479	[3]	81 kDa	TRUE	1	0	0	0	1
Cluster of PREDICTED: G-protein coupled receptor 126 isoform X4 [Canis lupus familiaris] (gi|545485497)	ADGRG6	gi|545485497		140 kDa	TRUE	0	0	0	1	1
PREDICTED: ras-related protein Rab-32 [Canis lupus familiaris]	RAB32	gi|545485583		15 kDa		1	0	0	0	1
PREDICTED: keratinocyte differentiation-associated protein isoform X1 [Canis lupus familiaris]	KRTDAP	gi|545486326		9 kDa	TRUE	0	0	0	1	1
Cluster of PREDICTED: serine/threonine-protein phosphatase 6 regulatory subunit 1 isoform X1 [Canis lupus familiaris] (gi|545487415)	PPP6R1	gi|545487415	[4]	99 kDa	TRUE	0	0	1	0	1
PREDICTED: myeloid-associated differentiation marker-like isoform X2 [Canis lupus familiaris]	LOC100855913	gi|545487462		35 kDa		1	0	0	0	1
PREDICTED: N-formyl peptide receptor 2 [Canis lupus familiaris]	FPR2	gi|545487499		39 kDa		1	0	0	0	1
PREDICTED: sulfotransferase family cytosolic 2B member 1 [Canis lupus familiaris]	SULT2B1	gi|545487894		38 kDa	TRUE	0	0	0	1	1
PREDICTED: LOW QUALITY PROTEIN: relA-associated inhibitor [Canis lupus familiaris]	PPP1R13L	gi|545488152		91 kDa		0	0	0	1	1
PREDICTED: cytochrome P450 2F5-like [Canis lupus familiaris]	CYP2F1	gi|545488441		56 kDa		1	0	0	0	1
PREDICTED: phospholipase D3 isoform X2 [Canis lupus familiaris]	PLD3	gi|545488477		55 kDa		1	0	0	0	1
PREDICTED: 40S ribosomal protein S16 isoform X1 [Canis lupus familiaris]	RPS16	gi|545488542	(+1)	17 kDa		1	0	0	0	1
PREDICTED: proprotein convertase subtilisin/kexin type 5 [Canis lupus familiaris]	PCSK5	gi|545489174		205 kDa		0	1	0	0	1
PREDICTED: integrin beta-1 isoform X2 [Canis lupus familiaris]	ITGB1	gi|545489482		88 kDa	TRUE	0	0	1	0	1
Cluster of PREDICTED: ras-related protein Rab-18 isoform X1 [Canis lupus familiaris] (gi|545489511)	RAB18	gi|545489511		21 kDa	TRUE	0	0	0	1	1
Cluster of PREDICTED: LIM zinc-binding domain-containing Nebulette isoform X4 [Canis lupus familiaris] (gi|545489670)	NEBL	gi|545489670		116 kDa	TRUE	0	0	0	1	1
Cluster of PREDICTED: optineurin isoformX1 [Canis lupus familiaris] (gi|545489974)	OPTN	gi|545489974	[2]	66 kDa	TRUE	1	0	0	0	1
PREDICTED: isopentenyl-diphosphate Delta-isomerase 1, partial [Canis lupus familiaris]	IDI1	gi|545490135		18 kDa	TRUE	0	0	1	0	1
PREDICTED: transcriptional activator protein Pur-alpha isoform X3 [Canis lupus familiaris]	pur-alpha	gi|545490326		35 kDa		0	0	1	0	1
Cluster of PREDICTED: FCH and double SH3 domains protein 1 isoform X1 [Canis lupus familiaris] (gi|545490430)	FCHSD1	gi|545490430	[3]	77 kDa	TRUE	1	0	0	0	1
PREDICTED: trafficking protein particle complex subunit 13 isoform X6 [Canis lupus familiaris]	TRAPPC13	gi|545490831		46 kDa		0	0	0	1	1
PREDICTED: FCH domain only protein 2 [Canis lupus familiaris]	FCHO2	gi|545490911		86 kDa		1	0	0	0	1
PREDICTED: probable G-protein coupled receptor 97 isoform X1 [Canis lupus familiaris]	ADGRG3	gi|545491036		63 kDa		1	0	0	0	1
Cluster of PREDICTED: homocysteine-inducible, endoplasmic reticulum stress-inducible, ubiquitin-like domain member 1 isoform X4 [Canis lupus familiaris] (gi|545491100)	HERPUD1	gi|545491100	[2]	35 kDa	TRUE	0	0	1	0	1
PREDICTED: AKT-interacting protein isoform X5 [Canis lupus familiaris]	AKTIP	gi|545491163		33 kDa		1	0	0	0	1
gi|545491224|ref|XP_005617635.1| PREDICTED: HEAT repeat-containing protein 3 [Canis lupus familiaris]	HEATR3	gi|545491224	|ref|XP_005617635.1| PREDICTED: HEAT repeat-containing protein 3 [Canis lupus familiaris]-DECOY	?		0	0	0	1	1
PREDICTED: NEDD4-binding protein 1 [Canis lupus familiaris]	N4BP1	gi|545491249		91 kDa		1	0	0	0	1
PREDICTED: uncharacterized protein LOC612166 [Canis lupus familiaris]	AIM1L	gi|545491719		200 kDa	TRUE	0	0	1	0	1
Cluster of PREDICTED: platelet-activating factor acetylhydrolase 2, cytoplasmic isoform X4 [Canis lupus familiaris] (gi|545491769)	PAFAH2	gi|545491769		46 kDa	TRUE	1	0	0	0	1
Cluster of PREDICTED: heterogeneous nuclear ribonucleoprotein R isoform X3 [Canis lupus familiaris] (gi|545491908)	HNRNPR	gi|545491908	[2]	71 kDa	TRUE	0	0	1	0	1
Cluster of PREDICTED: E3 ubiquitin-protein ligase UBR4 isoform X4 [Canis lupus familiaris] (gi|545492112)	UBR4	gi|545492112	[2]	578 kDa	TRUE	0	1	0	0	1
gi|545492283|ref|XP_005618006.1| PREDICTED: LOW QUALITY PROTEIN: probable cation-transporting ATPase 13A2 [Canis lupus familiaris]	ATP13A2	gi|545492283	|ref|XP_005618006.1| PREDICTED: LOW QUALITY PROTEIN: probable cation-transporting ATPase 13A2 [Canis lupus familiaris]-DECOY	?	TRUE	0	0	0	1	1
PREDICTED: transmembrane protein 51 isoform X4 [Canis lupus familiaris]	TMEM51	gi|545492359		28 kDa		1	0	0	0	1
PREDICTED: EF-hand domain-containing protein D2 [Canis lupus familiaris]	EFHD2	gi|545492476		22 kDa	TRUE	0	1	0	0	1
PREDICTED: leucyl-cystinyl aminopeptidase isoform X1 [Canis lupus familiaris]	LNPEP	gi|545492629		119 kDa	TRUE	0	0	1	0	1
Cluster of PREDICTED: protein FAM172A isoform X6 [Canis lupus familiaris] (gi|545492743)	FAM172A	gi|545492743	[2]	38 kDa	TRUE	1	0	0	0	1
PREDICTED: single-stranded DNA-binding protein 2 isoform X5 [Canis lupus familiaris]	Ssbp2	gi|545492887		35 kDa	TRUE	0	0	0	1	1
gi|545492968|ref|XP_005618243.1| PREDICTED: proteinase-activated receptor 1 [Canis lupus familiaris]	F2R	gi|545492968	|ref|XP_005618243.1| PREDICTED: proteinase-activated receptor 1 [Canis lupus familiaris]-DECOY	?		0	0	0	1	1
PREDICTED: basic proline-rich protein-like [Canis lupus familiaris]	LOC102151979	gi|545493047		88 kDa		0	0	0	1	1
Cluster of PREDICTED: RNA-binding protein 47 isoform X2 [Canis lupus familiaris] (gi|545493147)	RBM47	gi|545493147		67 kDa	TRUE	1	0	0	0	1
PREDICTED: isocitrate dehydrogenase [NADP], mitochondrial isoform X2 [Canis lupus familiaris]	IDH2	gi|545493473		47 kDa	TRUE	1	0	0	0	1
PREDICTED: UPF0235 protein C15orf40 homolog [Canis lupus familiaris]	C3H15orf40	gi|545493571		28 kDa		0	0	0	1	1
Cluster of PREDICTED: pro-interleukin-16 isoformX1 [Canis lupus familiaris] (gi|545493612)	IL16	gi|545493612	[2]	147 kDa	TRUE	0	1	0	0	1
PREDICTED: grpE protein homolog 1, mitochondrial [Canis lupus familiaris]	GRPEL1	gi|545493740		26 kDa		0	0	0	1	1
PREDICTED: macrophage erythroblast attacher [Canis lupus familiaris]	MAEA	gi|545493949		44 kDa		1	0	0	0	1
PREDICTED: sodium-dependent phosphate transport protein 2B isoform X2 [Canis lupus familiaris]	SLC34A2	gi|545494271	(+1)	78 kDa		0	0	0	1	1
Cluster of PREDICTED: major facilitator superfamily domain-containing protein 7 isoform X3 [Canis lupus familiaris] (gi|545494427)	MFSD7	gi|545494427	[2]	46 kDa	TRUE	0	0	0	1	1
PREDICTED: prolyl 4-hydroxylase subunit alpha-1 isoform X4 [Canis lupus familiaris]	P4HA1	gi|545495221		61 kDa		0	0	1	0	1
Cluster of PREDICTED: dnaJ homolog subfamily B member 2-like [Canis lupus familiaris] (gi|545495476)	LOC102151313	gi|545495476	[2]	29 kDa	TRUE	1	0	0	0	1
Cluster of PREDICTED: ras-related protein Rab-24 isoform X1 [Canis lupus familiaris] (gi|545495648)	RAB24	gi|545495648	[2]	23 kDa	TRUE	1	0	0	0	1
PREDICTED: protein FAM114A2 [Canis lupus familiaris]	FAM114A2	gi|545495999		55 kDa		0	1	0	0	1
PREDICTED: sorting nexin-18 isoform X2 [Canis lupus familiaris]	SNX18	gi|545496184		60 kDa		1	0	0	0	1
PREDICTED: complement component C6 isoform X2 [Canis lupus familiaris]	C6	gi|545496287		108 kDa	TRUE	1	0	0	0	1
PREDICTED: peptidyl-prolyl cis-trans isomerase F, mitochondrial [Canis lupus familiaris]	PPIF	gi|545496532		17 kDa	TRUE	0	0	1	0	1
PREDICTED: PDZ and LIM domain protein 7 [Canis lupus familiaris]	PDLIM7	gi|545496549		47 kDa	TRUE	1	0	0	0	1
PREDICTED: interleukin-18 isoform X1 [Canis lupus familiaris]	IL18	gi|545496637		23 kDa		1	0	0	0	1
PREDICTED: zinc finger and BTB domain-containing protein 44 isoform X5 [Canis lupus familiaris]	ZBTB44	gi|545496778		69 kDa		0	0	0	1	1
PREDICTED: CMP-N-acetylneuraminate-beta-galactosamide-alpha-2,3-sialyltransferase 4 isoform X1 [Canis lupus familiaris]	ST3GAL4	gi|545496844		42 kDa		1	0	0	0	1
PREDICTED: transmembrane protease serine 4 [Canis lupus familiaris]	TMPRSS4	gi|545497248		48 kDa		0	0	1	0	1
PREDICTED: LOW QUALITY PROTEIN: beta-arrestin-2 [Canis lupus familiaris]	ARRB2	gi|545497840		46 kDa	TRUE	0	0	1	0	1
PREDICTED: RING finger protein 222 isoform X1 [Canis lupus familiaris]	RNF222	gi|545498096		22 kDa		1	0	0	0	1
Cluster of PREDICTED: FGGY carbohydrate kinase domain-containing protein isoform X2 [Canis lupus familiaris] (gi|545498656)	FGGY	gi|545498656	[2]	59 kDa	TRUE	1	0	0	0	1
PREDICTED: transmembrane protein 59 isoform X2 [Canis lupus familiaris]	TMEM59	gi|545498729		36 kDa		0	1	0	0	1
PREDICTED: isobutyryl-CoA dehydrogenase, mitochondrial, partial [Canis lupus familiaris]	ACAD8	gi|545498813		42 kDa		0	0	1	0	1
PREDICTED: thioredoxin domain-containing protein 17 [Canis lupus familiaris]	TXNDC17	gi|545498875		15 kDa		1	0	0	0	1
PREDICTED: c-X-C motif chemokine 16 [Canis lupus familiaris]	CXCL16	gi|545498880		47 kDa	TRUE	1	0	0	0	1
PREDICTED: arf-GAP with coiled-coil, ANK repeat and PH domain-containing protein 1 [Canis lupus familiaris]	ACAP1	gi|545498882		82 kDa	TRUE	0	0	1	0	1
PREDICTED: ubiquitin carboxyl-terminal hydrolase 24 [Canis lupus familiaris]	USP24	gi|545498931		290 kDa	TRUE	0	0	1	0	1
PREDICTED: uncharacterized protein C1orf170 homolog isoform X1 [Canis lupus familiaris]	PERM1	gi|545498958		78 kDa		0	0	0	1	1
PREDICTED: NAD kinase [Canis lupus familiaris]	NADK	gi|545499101		55 kDa		1	0	0	0	1
Cluster of PREDICTED: RING finger protein 207 isoform X1 [Canis lupus familiaris] (gi|545499231)	RNF207	gi|545499231	[2]	69 kDa	TRUE	1	0	0	0	1
[truncated: 494 more rows]
[truncated: 1 more columns]
